# Supplementary material for: Microglia regulate nucleus accumbens synaptic development and circuit function underlying threat avoidance behaviors
Source: Research Square preprint supplement (doi:10.21203/rs.3.rs-5837701/v1), 2025-01-22
Supplement: Supplementary file 1 [file 88b443f86dff91cce9c0120a.xlsx]

## Sheet: all proteins
UniProtID	Gene Symbol	Description	WT1_male	WT2_Female	WT3_Female	WT4_Male	WT5_Male	KO1_Male	KO2_Female	KO3_Male	KO4_Female	KO5_Male
Q9CPV9	P2ry12	purinergic receptor P2Y, G-protein coupled 12	25.6047	24.2544	25.4285	24.5772	24.9621	21.4108	21.1471	20.4312	20.4312	20.6289
Q9R118	Htra1	HtrA serine peptidase 1	23.6731	20.4312	20.4312	20.4312	20.4312	25.7321	25.2586	24.952	26.177	26.5234
Q3V117	Acly	ATP citrate lyase	30.8053	30.7288	30.8269	30.7512	30.6509	30.902	30.9927	31.0084	30.9927	31.0473
P20060	Hexb	hexosaminidase B	26.8951	26.6265	26.5968	27.3099	26.2032	21.4108	23.476	22.4333	24.4503	20.6289
P26041	Msn	moesin	26.4028	27.1644	26.0454	25.8175	26.1533	21.4108	21.1471	24.0414	23.5805	20.6289
Q80ZJ7	Snx32	sorting nexin 32	20.475	22.1372	20.4312	22.4899	20.6289	23.906	24.9595	24.1628	23.0302	23.9067
P48320	Gad2	glutamic acid decarboxylase 2	31.2022	31.4337	31.2022	31.1029	31.6014	30.6189	30.6856	30.5629	31.0311	30.5355
Q7TNB5	Gria1	glutamate receptor, ionotropic, AMPA1 (alpha 1)	28.2086	28.586	27.9902	28.4183	28.3012	28.7464	28.9825	29.1014	28.7513	28.8591
P55096	Abcd3	ATP-binding cassette, sub-family D member 3	26.9426	26.7593	26.6744	26.714	26.3453	27.7367	27.7148	27.7699	27.2349	27.0977
F8WGF8	Myo16	None	20.475	20.4312	20.4312	20.4312	20.4312	26.24	21.1471	24.9425	24.4734	25.2825
P40124	Cap1	cyclase associated actin cytoskeleton regulatory protein 1	31.1814	31.2717	31.1069	31.086	31.0953	30.8544	30.5692	30.7373	31.0084	30.5559
Q9CPQ1	Cox6c	cytochrome c oxidase subunit 6C	31.6976	31.8137	31.7756	31.7756	31.6861	31.5394	31.6413	31.4337	31.2717	31.4065
Q3UMR5	Mcu	mitochondrial calcium uniporter	28.3632	28.4007	28.6767	28.621	28.5479	28.7301	29.1507	28.9945	28.81	29.0464
Q9CR39	Wdr45b	WD repeat domain 45B	22.5701	22.9568	22.2472	23.5895	21.836	24.3928	24.8235	24.0597	23.5031	24.3316
P52503	Ndufs6	NADH:ubiquinone oxidoreductase core subunit S6	26.8581	26.5933	26.4981	25.9518	26.7701	25.9144	25.6162	25.251	25.9554	25.606
P17439	Gba1	glucosylceramidase beta 1	20.475	20.4312	20.4312	21.2441	20.475	21.4108	23.9177	22.2808	23.0156	24.6112
Q3TD49	Sppl2b	signal peptide peptidase like 2B	20.475	20.4312	20.4312	20.4312	20.4312	21.4108	22.9584	22.4086	20.952	23.0182
P14733	Lmnb1	lamin B1	30.0926	30.112	30.4421	29.9995	30.2644	29.311	29.8593	29.5886	29.8267	29.2211
Q6PIC6	Atp1a3	ATPase, Na+/K+ transporting, alpha 3 polypeptide	34.7685	34.5728	34.5728	34.455	34.7685	34.455	34.3402	34.3402	34.3402	34.2765
O35075	Vps26c	VPS26 endosomal protein sorting factor C	24.3702	23.7062	22.4209	24.038	23.593	25.3687	25.3107	24.5296	25.0769	25.1042
Q8BJU0	Sgta	small glutamine-rich tetratricopeptide repeat (TPR)-containing, alpha	24.1968	24.1532	24.506	24.3033	24.0644	25.8412	24.9245	24.8148	24.7901	25.7067
S4R286	None	None	28.1815	27.9902	28.3789	27.9366	27.8333	28.3203	28.6819	28.7258	28.4375	28.8211
A9Z1V5	Vwa5b1	von Willebrand factor A domain containing 5B1	24.7677	25.4842	24.6978	24.0869	25.2142	21.4108	24.0689	20.4312	23.056	20.6289
Q78J03	Msrb2	methionine sulfoxide reductase B2	23.3305	24.6468	23.9833	24.2275	25.0898	21.4108	21.1471	22.1149	23.8008	20.6289
Q8CII5	Tia1	cytotoxic granule-associated RNA binding protein 1	21.965	20.475	20.4312	20.9273	20.5734	22.9501	23.8453	22.3133	21.4967	23.6126
Q3TJZ6	Fam98a	family with sequence similarity 98, member A	20.475	20.4312	20.4312	22.3608	21.4041	22.9584	24.044	22.1372	22.9584	22.467
P31650	Slc6a11	solute carrier family 6 (neurotransmitter transporter, GABA), member 11	30.5235	31.1317	30.4351	30.4314	31.1524	30.2672	29.5562	29.6041	30.2254	29.7788
B1AU25	Aifm1	apoptosis-inducing factor, mitochondrion-associated 1	28.7699	28.5628	28.8528	28.9149	28.6898	29.0724	29.1406	29.1135	28.8959	28.9945
P39053	Dnm1	dynamin 1	28.1248	27.6044	28.2719	28.1509	27.7274	28.2197	28.7127	28.674	28.9886	28.6392
Q8BL66	Eea1	early endosome antigen 1	28.0573	28.4403	28.7505	28.2719	28.644	27.0447	27.7612	27.4023	28.2156	27.3481
O08530	S1pr1	sphingosine-1-phosphate receptor 1	22.8349	21.5516	22.52	22.3765	22.081	24.8974	22.9023	24.8235	23.1556	24.3365
A2A6U3	Septin9	septin 9	28.5736	28.3432	28.4634	28.6767	28.3079	28.7908	29.0494	28.9647	28.5881	28.9698
Q91XD6	Vps36	vacuolar protein sorting 36	23.0878	24.1559	24.7817	23.4425	24.7053	25.0265	25.3445	25.3906	25.3357	25.4582
Q9QXX4	Slc25a13	solute carrier family 25 (mitochondrial carrier, adenine nucleotide translocator), member 13	27.2247	27.117	27.0437	27.2805	26.6011	27.9227	27.4764	27.4367	27.5711	27.5933
Q61696	Hspa1a	heat shock protein 1A	24.1047	23.7616	24.1197	23.9324	23.7397	24.748	24.3155	24.2155	24.4875	25.0538
Z4YKT6	None	None	25.0525	24.3198	24.4503	25.3829	23.822	25.6114	25.5994	26.3032	25.3772	25.9206
O08997	Atox1	antioxidant 1 copper chaperone	20.475	20.4312	20.6289	20.4312	20.4312	23.3377	23.0501	22.1598	20.4312	23.1757
P29341	Pabpc1	poly(A) binding protein, cytoplasmic 1	29.3971	29.546	29.4722	29.5683	29.3186	29.6369	30.1533	29.9365	29.7971	29.6662
Q9DCJ9	Npl	N-acetylneuraminate pyruvate lyase	23.4425	22.8056	23.1082	23.6358	23.5805	21.4108	23.3578	20.4312	20.4312	20.6289
Q8QZY1	Eif3l	eukaryotic translation initiation factor 3, subunit L	27.1802	27.3192	27.357	27.2608	27.0152	27.479	27.5473	27.6	27.3243	27.5853
P62141	Ppp1cb	protein phosphatase 1 catalytic subunit beta	28.6548	28.7236	28.8029	28.5713	28.8188	28.6099	28.3659	28.4197	28.5581	28.4791
Q6PIE5	Atp1a2	ATPase, Na+/K+ transporting, alpha 2 polypeptide	35.0774	35.0774	34.9092	34.9625	35.0774	34.9092	34.8398	34.9092	34.8398	34.9092
G5E8H1	None	None	30.2142	30.2039	30.1834	30.3316	30.1189	30.3998	30.5013	30.5435	30.2501	30.6027
P17427	Ap2a2	adaptor-related protein complex 2, alpha 2 subunit	31.8246	31.8323	31.8539	31.9295	31.6193	31.8921	32.0884	32.0355	32.1295	32.2035
P62812	Gabra1	gamma-aminobutyric acid type A receptor subunit alpha 1	29.0937	28.8257	28.6566	28.93	29.3896	28.3164	28.3502	27.9541	28.798	28.2535
P48722	Hspa4l	heat shock protein 4 like	29.8816	30.1569	30.0586	30.2447	30.073	29.7354	29.921	29.7626	29.9313	29.7857
Q9DCT1	Akr1e1	aldo-keto reductase family 1, member E1	25.3551	25.6949	24.9328	25.337	25.6678	23.6475	24.776	22.2736	20.4312	22.9406
A0A0G2JFD8	None	None	20.475	20.4312	20.6289	20.4312	20.4312	24.397	23.9324	20.6289	23.0272	22.1083
Q60625	Icam5	intercellular adhesion molecule 5, telencephalin	29.6532	29.7312	29.8034	29.4977	29.7604	29.8103	29.8735	29.9113	30.0669	30.0553
Q3UH45	Tecpr2	tectonin beta-propeller repeat containing 2	20.475	21.2929	20.4312	21.6693	20.4312	21.4108	22.493	22.2528	23.6839	22.1947
Q924C1	Xpo5	exportin 5	24.2661	23.5534	23.8308	24.0414	23.8268	24.315	24.848	24.6468	24.1434	24.5081
Q9Z0V7	Timm17b	translocase of inner mitochondrial membrane 17b	23.6839	24.2177	24.5993	25.3182	23.7489	25.3864	25.9323	25.6188	25.0073	25.394
Q3TBW2	Mrpl10	mitochondrial ribosomal protein L10	25.3226	24.905	25.3317	25.7858	25.3704	25.6487	26.514	25.9221	25.9537	26.0574
Q9CWU6	Uqcc1	ubiquinol-cytochrome c reductase complex assembly factor 1	20.475	21.553	20.4312	23.2679	21.5278	23.9595	23.7098	24.0967	22.1508	24.6456
A2AAN2	None	None	26.5723	26.0044	25.893	26.4386	26.244	25.7661	25.1934	25.7741	25.8966	25.3762
Q04447	Ckb	creatine kinase, brain	33.222	33.222	33.2537	33.3841	33.2537	33.4689	33.3841	33.5961	33.3841	33.7235
Q8JZS0	Lin7a	lin-7 homolog A, crumbs cell polarity complex component	29.5537	29.3765	29.6041	29.5937	29.6744	29.4611	29.3239	29.197	29.3458	29.3686
Q8BGY7	Fam210a	family with sequence similarity 210, member A	24.3155	24.4418	23.6629	24.9961	23.4372	25.1505	26.4913	26.1138	24.5934	26.065
A0A498WGS3	None	None	33.96	33.6498	33.5059	33.6733	33.96	33.3055	32.7928	33.1937	33.6295	32.9856
Q91VS7	Mgst1	microsomal glutathione S-transferase 1	23.9001	23.5234	22.8539	23.364	23.098	21.4108	21.1471	22.7413	22.8325	20.6289
Q9DCN2	Cyb5r3	cytochrome b5 reductase 3	29.6521	29.372	29.5625	29.4593	29.3676	29.6973	29.9807	29.7593	29.7788	29.5937
A0A498WGM0	Syt7	synaptotagmin VII	28.8802	28.7276	28.723	28.7823	28.8591	28.9455	29.1046	28.8362	28.9705	29.0434
P15105	Glul	glutamate-ammonia ligase	33.1064	33.1247	32.9018	33.0283	33.1698	32.9242	32.8838	32.6426	32.9242	32.695
P99024	Tubb5	tubulin, beta 5 class I	30.7146	30.6888	30.6398	30.7288	30.7512	31.0707	30.7856	30.8334	30.8448	31.086
O88485	Dync1i1	dynein cytoplasmic 1 intermediate chain 1	27.2398	27.1991	26.774	27.3117	27.3563	26.7036	26.6475	26.673	27.0472	26.4113
P62484	Abi2	abl interactor 2	27.5836	27.8891	27.2621	27.8341	27.5978	28.039	28.4026	28.2077	27.7815	28.2696
Q91VM3	Wdr45	WD repeat domain 45	24.8022	23.742	24.5538	24.6978	24.2973	21.4108	21.1471	22.4757	22.292	24.5296
E9Q1V2	None	None	20.475	23.3008	20.4312	20.4312	20.4312	24.2677	23.4938	22.0496	25.1226	22.9086
P55012	Slc12a2	solute carrier family 12, member 2	27.4808	27.0027	26.6771	27.1129	27.0285	26.6659	26.1162	26.3453	26.8581	26.1424
P26039	Tln1	talin 1	27.4965	26.8959	27.0447	27.3366	26.7008	25.1874	25.4734	26.5494	26.8544	25.2028
P97927	Lama4	laminin, alpha 4	20.475	20.6289	20.6289	22.5406	20.6289	21.4108	23.5402	23.859	22.4826	23.0941
D3Z742	Mb21d2	Mab-21 domain containing 2	22.5223	20.6289	20.5734	20.4312	20.4312	23.0084	22.8128	21.2142	23.7201	23.407
Q91XW9	Pcdhgc5	protocadherin gamma subfamily C, 5	26.0217	25.9931	26.2133	26.3508	26.0147	26.9389	27.0952	26.3571	26.2624	26.7802
Q61701	Elavl4	ELAV like RNA binding protein 4	27.6889	27.9106	27.8891	27.7035	27.2291	28.247	28.2264	27.9786	28.1071	28.7602
Q9D394	Rufy3	RUN and FYVE domain containing 3	29.4629	29.3409	29.6001	29.3661	29.5293	29.2287	29.0956	29.2781	29.3784	29.2528
H3BIW6	None	None	26.7985	27.0691	26.6198	26.6155	27.2572	25.6119	26.0114	26.5457	26.5851	26.1289
A0A0A6YVR9	None	None	25.0379	24.886	24.6206	25.0036	24.606	24.5182	24.6739	24.0505	24.0784	24.4307
Q9CXW3	Cacybp	calcyclin binding protein	27.8674	28.2521	27.9775	28.2018	27.9227	26.7438	27.2663	27.8961	27.6623	27.403
Q9ERL9	Gucy1a1	guanylate cyclase 1, soluble, alpha 1	27.5853	27.1829	27.4313	27.6278	27.5553	27.1842	27.1932	27.2589	27.2224	27.2608
Q91WM1	Strbp	spermatid perinuclear RNA binding protein	20.475	20.4312	20.4312	20.4312	20.4312	25.8627	24.7279	21.9928	23.3792	20.6289
Q3UHT7	Erc2	ELKS/RAB6-interacting/CAST family member 2	30.1722	29.9839	29.847	29.7959	29.9113	29.1527	29.1094	29.2235	30.0128	29.4556
Q8K4Z0	Lgi2	leucine-rich repeat LGI family, member 2	22.4966	23.2615	22.851	24.7076	23.734	22.861	21.1471	20.4312	20.6289	22.4413
Q9D387	Lamp5	lysosomal-associated membrane protein family, member 5	26.5933	26.0682	26.5933	26.2152	27.403	25.5109	26.1203	25.7291	25.8599	24.8988
P10605	Ctsb	cathepsin B	27.2749	27.0304	26.9708	27.2828	27.4727	26.482	26.5553	27.1967	26.7593	26.663
Q91WS0	Cisd1	CDGSH iron sulfur domain 1	30.3247	30.631	30.5559	30.6856	30.4818	30.0769	30.4753	30.1949	30.3247	30.1895
Q8BHC1	Rab39b	RAB39B, member RAS oncogene family	25.7291	25.7807	26.1215	26.4028	26.2537	26.3969	27.1115	27.2061	26.2301	27.3398
Q8VDD5	Myh9	myosin, heavy polypeptide 9, non-muscle	29.4308	29.7604	29.8958	29.5413	29.6299	28.8716	28.598	29.1417	29.6989	28.7258
P84096	Rhog	ras homolog family member G	24.5503	23.822	25.0172	24.0967	25.2221	23.8684	21.1471	21.8873	22.5261	23.9683
Q5M8N4	Sdr39u1	short chain dehydrogenase/reductase family 39U, member 1	25.9072	25.8899	26.4688	26.8045	25.7263	26.4688	27.0205	27.1289	26.7074	27.2768
Q8BZ81	Lrrtm3	leucine rich repeat transmembrane neuronal 3	25.9152	24.8606	25.0521	25.3445	24.4368	25.8203	25.8435	25.8004	26.2457	25.8412
P35762	Cd81	CD81 antigen	29.5014	28.8959	29.5485	29.1756	29.3441	29.7946	29.6635	29.7135	29.4977	30.0518
P12849	Prkar1b	protein kinase, cAMP dependent regulatory, type I beta	27.0285	26.2817	25.9355	25.7681	26.3586	26.1634	24.8073	25.1469	24.7575	25.4445
Q8R0F8	Fahd1	fumarylacetoacetate hydrolase domain containing 1	24.2973	24.0703	23.0156	24.8424	23.6773	25.3291	25.1784	25.1865	24.2861	25.3864
P05132	Prkaca	protein kinase, cAMP dependent, catalytic, alpha	30.3741	30.6856	30.5355	30.3674	30.5128	30.6093	30.9341	30.7146	30.6398	30.8701
P28028	Braf	Braf transforming gene	26.0354	26.3517	26.2311	26.2537	26.9644	26.6667	27.3752	26.985	26.9656	26.7895
P14152	Mdh1	malate dehydrogenase 1, NAD (soluble)	33.3371	33.4689	33.1572	33.3371	33.2072	33.096	33.1937	33.0844	33.1572	33.1064
F8VQE9	Agap3	ArfGAP with GTPase domain, ankyrin repeat and PH domain 3	27.7974	27.8361	27.7499	27.6142	27.6533	27.8459	28.0198	27.8221	27.9541	27.8474
Q9WUU7	Ctsz	cathepsin Z	23.995	23.4297	23.9644	20.4312	24.6507	21.4108	21.1471	20.4312	21.4864	20.6289
V9GX43	None	None	20.475	20.921	20.4312	20.4312	20.4312	21.4108	22.8539	21.3986	20.6289	22.1149
Q9CR57	Rpl14	ribosomal protein L14	27.2572	26.1177	26.958	26.6707	25.4818	27.5228	27.9402	27.2098	27.2087	27.7076
Q9WTS4	Tenm1	teneurin transmembrane protein 1	26.3135	25.9247	26.7265	26.183	26.551	26.9266	26.7802	26.8956	26.5328	26.8781
Q5SVL6	Rap1gap2	RAP1 GTPase activating protein 2	25.7367	25.5121	25.6001	25.5075	25.7672	25.6259	26.0392	26.0392	25.9668	26.3701
P70372	Elavl1	ELAV like RNA binding protein 1	28.6291	28.6686	28.4128	28.3333	28.3193	29.0434	29.1389	28.8629	29.0641	28.4261
Q9CX86	Hnrnpa0	heterogeneous nuclear ribonucleoprotein A0	27.9402	27.7795	27.8221	27.9489	27.3324	28.544	28.5736	28.1051	28.1949	27.9099
Q60668	Hnrnpd	heterogeneous nuclear ribonucleoprotein D	29.3311	29.197	29.1094	29.5862	29.1135	29.6521	30.0217	29.83	29.5886	29.3517
Q8K2I1	Fntb	farnesyltransferase, CAAX box, beta	22.5923	23.5317	23.0251	20.4312	22.8202	21.4108	21.1471	20.4312	20.4312	20.6289
P34914	Ephx2	epoxide hydrolase 2, cytoplasmic	26.9787	26.5336	26.7008	27.198	26.7461	27.3071	27.1881	27.4009	26.9787	27.2663
E0CXW2	None	None	20.475	20.4312	20.4312	22.1508	20.4312	23.1757	26.4416	21.6693	23.2475	22.3352
E9QNF7	Cntnap2	contactin associated protein-like 2	29.1809	29.327	29.0884	29.2169	29.3458	29.122	28.6017	28.7737	29.1613	28.7513
P03995	Gfap	glial fibrillary acidic protein	25.2753	24.7536	27.8361	27.7746	26.5152	28.2246	28.7258	29.5014	28.2216	27.6561
D3YVF0	Akap5	A kinase anchor protein 5	29.9515	30.1895	30.6189	30.0322	30.2796	30.6284	30.7461	30.7688	30.3017	30.7235
Q9WU60	Atrn	attractin	25.1852	24.1956	23.9364	23.6839	24.6468	23.7588	21.1471	21.9823	23.5895	23.0234
Q9WTP7	Ak3	adenylate kinase 3	28.6499	28.9381	28.6017	28.7127	28.8802	28.4755	28.4214	28.6291	28.5941	28.5669
P63044	Vamp2	vesicle-associated membrane protein 2	30.1445	30.0621	29.9113	30.2223	29.9023	30.4106	30.3631	30.26	30.0797	30.4421
Q8VHM5	Hnrnpr	heterogeneous nuclear ribonucleoprotein R	28.5669	28.5143	28.3806	28.8802	28.4244	28.8362	29.546	29.0754	28.6752	29.1135
Q9D964	Gatm	glycine amidinotransferase (L-arginine:glycine amidinotransferase)	24.5772	24.8122	23.0338	24.5485	22.5406	21.4108	21.1471	24.1405	20.4312	20.6289
Q8BGD5	Cpt1c	carnitine palmitoyltransferase 1c	26.5791	26.0082	25.9221	25.6949	26.2392	26.228	25.0355	24.8042	25.1943	24.6526
P50096	Impdh1	inosine monophosphate dehydrogenase 1	20.475	23.4136	21.5558	23.2973	20.4312	24.7863	22.7838	24.9872	23.9095	23.6839
G5E8T9	Hagh	hydroxyacyl glutathione hydrolase	28.8667	29.1135	28.532	28.6188	28.7127	28.634	28.5067	28.1071	28.3465	28.2863
P62245	Rps15a	ribosomal protein S15A	27.5083	26.9973	26.8097	27.317	26.4269	27.8462	28.213	27.4938	27.5131	27.4367
Q8BLC3	Lypd1	Ly6/Plaur domain containing 1	25.7672	25.0549	25.0549	25.7561	25.7854	26.2381	26.5611	25.9056	25.8909	25.9465
P19246	Nefh	neurofilament, heavy polypeptide	29.1613	28.161	28.3975	28.5894	28.6291	27.6502	28.3333	27.6243	28.3069	27.4242
P58854	Tubgcp3	tubulin, gamma complex component 3	20.475	20.4312	20.6289	21.3986	20.4312	22.9327	23.1022	21.4379	20.6289	22.388
Q5DQR4	Stxbp5l	syntaxin binding protein 5-like	28.4026	28.3111	28.4819	27.9756	28.4874	27.5762	27.8014	27.9925	28.2426	27.9838
Q810B7	Slitrk5	SLIT and NTRK-like family, member 5	22.3133	20.6289	21.9611	20.4312	21.4894	23.1802	22.5643	22.0574	22.3765	22.4444
Q3TF41	None	None	24.6342	24.4322	24.6918	24.5886	24.7934	25.8372	25.347	26.1723	24.5993	25.1352
Q80VP1	Epn1	epsin 1	27.211	26.6643	26.893	27.4839	27.1076	27.5798	27.7367	28.0159	27.1153	28.2055
Q8BP00	Iqcb1	IQ calmodulin-binding motif containing 1	23.6678	24.109	23.2826	23.9142	24.3316	24.1033	24.9706	24.5726	24.7076	24.2861
Q99J08	Sec14l2	SEC14-like lipid binding 2	26.0019	26.6097	26.5108	26.8116	26.1105	26.3651	25.3906	25.6155	25.8718	25.6514
Q3UX10	Tubal3	tubulin, alpha-like 3	23.8187	24.2753	24.2348	24.1916	23.6248	24.6223	24.6897	24.7677	24.0414	25.2215
G3UX26	None	None	25.0521	24.2027	24.8275	25.0999	23.8441	21.4108	21.1471	24.3221	24.1015	20.6289
Q9ESJ1	Cables1	CDK5 and Abl enzyme substrate 1	20.475	20.4312	20.4312	20.9413	20.4312	21.4108	23.2973	21.5339	20.6289	22.164
Q99NF7	Ppm1b	protein phosphatase 1B, magnesium dependent, beta isoform	20.475	20.4312	20.4312	23.3064	23.3754	24.1434	23.9386	23.995	22.382	25.2109
P98200	Atp8a2	ATPase, aminophospholipid transporter-like, class I, type 8A, member 2	24.8082	23.5081	23.922	22.8056	24.2572	21.4108	21.1471	24.475	20.4312	20.6289
P61961	Ufm1	ubiquitin-fold modifier 1	20.475	22.008	20.4312	24.4524	24.732	25.4163	25.4651	25.4423	23.7616	25.696
Q8K341	Atat1	alpha tubulin acetyltransferase 1	26.239	26.6771	26.5253	26.7553	26.4957	26.5579	27.3233	26.7593	27.4183	27.3012
Q8BG89	Zfp365	zinc finger protein 365	20.475	21.0508	22.2437	23.0302	21.2929	23.3993	23.2649	22.0246	23.5821	23.086
H3BJQ8	None	None	20.475	23.098	21.3899	21.3767	24.3298	23.0454	25.3291	24.6022	24.3889	24.0839
A0A1B0GQW0	None	None	20.475	20.6289	20.4312	20.4312	21.0716	23.2826	23.2356	21.2626	20.4312	23.1342
P56812	Pdcd5	programmed cell death 5	20.475	21.1797	20.4312	21.4041	20.6289	23.4113	21.1471	21.2831	21.9928	22.6527
Q64522	H2ac21	H2A clustered histone 21	25.7561	25.315	25.6614	26.0666	25.1857	25.433	25.076	24.9915	25.097	24.952
Q3UBW1	Spryd7	SPRY domain containing 7	20.475	23.3621	23.054	24.2753	25.2825	21.4108	21.1471	21.553	20.4312	20.6289
Q6S5J6	Krit1	KRIT1, ankyrin repeat containing	21.8154	20.4312	20.9273	22.1693	20.4993	23.2961	22.5719	22.4413	21.3899	24.4075
Q8R3C7	Ddx19b	DEAD box helicase 19b	26.2602	26.0002	26.0491	25.7688	26.7762	25.7137	25.5006	25.571	25.9393	25.6188
G3UXT7	None	None	28.5881	28.7737	29.3482	29.0972	28.9864	29.2332	29.4449	29.492	29.7857	29.1485
A2AIJ1	None	None	24.4407	23.6358	23.3328	23.4026	23.9324	23.9762	21.1471	20.4312	20.4312	22.8827
Q80X85	Mrps7	mitchondrial ribosomal protein S7	23.1661	22.5579	24.0839	23.5402	22.1885	23.6588	23.7397	24.9771	24.8328	24.1373
Q9QUG9	Rasgrp2	RAS, guanyl releasing protein 2	27.8547	27.2201	27.7624	27.5963	27.6931	26.9669	26.2612	26.6744	27.2756	27.5687
Q3UGY8	Arfgef3	ARFGEF family member 3	26.9082	26.8676	27.1053	26.9341	26.9389	26.4795	26.5445	26.4159	26.9426	25.7498
D3YXZ3	Klc2	None	27.3071	27.9786	27.7974	27.8547	27.8411	27.0656	27.6287	27.3681	27.4727	27.2276
P51863	Atp6v0d1	ATPase, H+ transporting, lysosomal V0 subunit D1	27.1115	27.0891	27.1323	26.5436	26.6509	28.1051	27.1289	27.3715	27.541	27.2291
A0A0U1RNK7	Dock7	dedicator of cytokinesis 7	23.2417	23.742	23.8684	24.1441	23.1996	23.4468	24.6621	25.0295	24.935	24.6088
Q61990	Pcbp2	poly(rC) binding protein 2	27.4554	27.1235	27.6082	28.2645	27.7699	28.1484	28.4448	28.5162	27.8255	28.2381
D3YYP5	None	None	23.536	20.6289	20.8691	20.4312	24.109	24.4934	24.1703	24.4093	23.6915	23.476
Q8BI08	Mal2	mal, T cell differentiation protein 2	25.757	24.9291	25.5109	24.2169	25.5109	26.3586	26.706	26.128	25.1874	27.0764
P21619	Lmnb2	lamin B2	27.3343	27.909	27.6209	27.7712	27.6082	26.735	27.158	27.5283	27.3359	26.2588
Q8BMK4	Ckap4	cytoskeleton-associated protein 4	28.1637	28.3659	28.2055	28.2216	28.3659	27.7148	27.6305	27.9069	28.3059	27.0522
A0A087WS04	Ktn1	kinectin 1	27.9925	28.5812	28.3079	28.1275	28.7954	27.6544	27.5587	28.0082	28.2914	27.1842
P21761	Trhr	thyrotropin releasing hormone receptor	20.475	20.4312	23.395	23.9578	20.4312	24.6371	25.0488	24.028	22.3854	24.4322
P16283	Slc4a3	solute carrier family 4 (anion exchanger), member 3	25.0999	26.7285	26.6433	25.9491	25.1824	23.5599	24.4695	24.6206	25.9867	24.1899
O35972	Mrpl23	mitochondrial ribosomal protein L23	25.4752	25.5013	25.3789	25.5642	24.9972	26.1893	25.9537	25.3884	25.7207	25.7976
P97772	Grm1	glutamate receptor, metabotropic 1	25.0698	25.7321	24.9223	23.1454	26.0962	23.8283	21.1471	21.7969	25.0295	20.6289
Q9WUK2	Eif4h	eukaryotic translation initiation factor 4H	27.9247	28.0269	27.9808	27.9641	27.3752	27.9688	28.6188	28.2739	28.2615	28.1932
O35633	Slc32a1	solute carrier family 32 (GABA vesicular transporter), member 1	30.1504	30.1949	30.1698	29.6863	30.5559	29.7857	29.6585	29.5562	29.9934	29.7649
F6S7W6	None	None	27.6618	27.7887	28.0584	27.6468	27.785	27.5872	27.4425	27.541	27.7463	27.3544
Q99JF8	Psip1	PC4 and SFRS1 interacting protein 1	28.0082	27.3022	27.9253	28.3975	27.7604	28.9569	28.2696	28.1794	28.7711	28.2544
D3Z730	None	None	22.3279	23.843	23.0368	23.8869	22.5943	24.339	24.5414	23.6487	23.6023	24.2753
Q8R326	Pspc1	paraspeckle protein 1	26.3873	25.4123	25.6188	27.3007	25.4141	27.4367	27.0747	27.1007	26.3499	27.4432
P62259	Ywhae	tyrosine 3-monooxygenase/tryptophan 5-monooxygenase activation protein, epsilon polypeptide	31.2351	31.0473	31.1524	30.9618	31.5919	31.0203	30.8544	30.8608	30.9618	30.8448
Q69ZP3	Pnkd	paroxysmal nonkinesiogenic dyskinesia	24.5414	23.574	24.4439	24.8395	24.2477	21.4108	21.1471	24.3593	23.971	20.6289
P48318	Gad1	glutamate decarboxylase 1	29.7788	29.8143	29.7007	30.0505	30.0834	29.2861	29.4358	29.1593	30.045	29.3065
Q9D0I9	Rars1	arginyl-tRNA synthetase 1	27.346	27.0459	26.7762	28.0778	26.7602	27.8526	28.0539	27.6943	27.5853	28.3032
Q04750	Top1	topoisomerase (DNA) I	24.8988	25.4035	25.5258	25.3846	24.2878	25.4937	26.9743	25.7858	25.606	26.0704
Q61334	Bcap29	B cell receptor associated protein 29	25.7377	25.3291	25.3445	24.5503	24.4658	21.4108	24.271	20.4312	23.9941	24.4237
P22005	Penk	preproenkephalin	24.7165	23.6839	24.9665	25.1535	25.0879	23.4834	21.1471	23.9595	24.2806	20.6289
P63143	Kcnab1	potassium voltage-gated channel, shaker-related subfamily, beta member 1	24.7934	23.895	23.912	26.0354	24.5538	25.7207	25.6001	26.0904	25.2263	25.7893
A0A494BBC4	None	None	20.475	20.4312	22.2736	22.4868	21.5564	23.5805	23.6773	22.5544	21.4904	23.5081
P24549	Aldh1a1	aldehyde dehydrogenase family 1, subfamily A1	30.4351	30.2213	30.1361	30.4156	30.3247	30.8863	30.9204	30.7785	30.1445	30.7146
A0A3B2WB82	None	None	20.475	20.4312	20.4312	22.9829	20.4312	21.4108	23.643	22.4259	22.1149	24.2325
B2RQR5	Sgsm1	small G protein signaling modulator 1	27.9132	28.3012	27.6468	27.8913	27.7875	27.2949	27.9287	27.3936	27.5762	27.3837
D3YYT0	None	None	25.546	25.5006	26.0574	24.8706	25.6092	26.5737	26.2588	25.8435	25.7681	26.1265
Q80TJ1	Cadps	Ca2+-dependent secretion activator	31.0473	30.8785	30.7512	31.0707	30.9927	31.1607	31.1029	31.1524	31.0203	31.1069
Z4YJU8	None	None	23.5429	22.0881	23.6686	21.0086	23.1342	21.4108	22.479	20.6289	20.4312	20.6289
Q80Y56	Rbsn	rabenosyn, RAB effector	20.475	22.1508	20.4312	23.7693	20.4312	21.4108	24.6972	23.4834	24.2177	24.7677
E9Q4D5	Rem2	rad and gem related GTP binding protein 2	26.4243	26.0983	27.2509	26.814	26.177	27.4441	27.2768	26.8668	26.9708	27.1568
P31938	Map2k1	mitogen-activated protein kinase kinase 1	30.8608	30.7373	30.8701	30.8785	30.7856	30.6254	30.7652	30.4156	30.819	30.4818
E0CYI9	None	None	29.9995	20.4312	23.1556	29.4308	24.0816	21.4108	21.1471	20.4312	20.4312	20.6289
Q9D2P8	Mobp	myelin-associated oligodendrocytic basic protein	26.7444	25.2586	26.5449	24.6214	25.7716	21.4108	21.1471	24.4934	25.1111	24.8974
A8Y5T6	Pars2	prolyl-tRNA synthetase (mitochondrial)(putative)	23.922	24.8344	25.0698	24.271	22.975	24.9961	25.1697	25.2643	25.0345	25.1943
P05532	Kit	KIT proto-oncogene receptor tyrosine kinase	22.4444	24.4439	24.5296	21.2952	24.2275	24.3994	26.5832	26.031	23.9078	26.4471
Q8BVG8	Nat14	N-acetyltransferase 14	23.6358	23.1802	22.3716	23.352	22.6501	24.1496	24.1301	23.086	24.038	23.574
P61027	Rab10	RAB10, member RAS oncogene family	30.0071	29.7741	30.0322	29.6137	30.1398	29.5485	29.7959	29.5964	29.7604	29.4611
Q9D2N9	Vps33a	VPS33A CORVET/HOPS core subunit	25.5013	25.6188	25.3772	26.065	25.4793	25.71	26.0186	26.0044	26.0114	25.9323
Q80ZW2	Them6	thioesterase superfamily member 6	25.1643	24.6621	24.9291	25.0375	25.5779	25.0036	26.4893	26.5933	25.3906	26.1138
J9RV59	None	None	23.1169	23.1729	22.5056	24.1015	23.4425	23.6915	24.6075	23.8626	23.7727	24.1603
Q8R361	Rab11fip5	RAB11 family interacting protein 5 (class I)	26.7653	27.0447	26.7495	26.0194	27.2233	25.84	25.1861	25.9413	26.8979	25.7279
Q7TMB8	Cyfip1	cytoplasmic FMR1 interacting protein 1	27.8892	27.6731	27.2153	27.6943	27.986	27.346	27.4808	27.0952	27.0227	27.4999
Q5DTN8	Jakmip3	janus kinase and microtubule interacting protein 3	20.475	23.9973	22.5544	22.3011	24.044	21.4108	21.1471	20.4312	21.3957	20.6289
P54823	Ddx6	DEAD-box helicase 6	27.1235	26.8781	26.8342	27.3398	26.4767	27.4691	27.2949	27.4585	27.0063	27.5263
Q9Z204	Hnrnpc	heterogeneous nuclear ribonucleoprotein C	29.3686	29.1485	29.1828	29.5347	29.04	29.6662	29.7593	29.7162	29.3065	29.3765
K3W4R2	None	None	25.2661	30.2841	25.097	25.6514	30.1361	24.6426	25.4246	23.734	24.2144	23.2395
Q9EQZ6	Rapgef4	Rap guanine nucleotide exchange factor (GEF) 4	28.0294	27.664	27.4242	27.4662	27.8474	27.8755	26.3723	26.9082	27.2233	26.5457
Q91VM9	Ppa2	pyrophosphatase (inorganic) 2	20.475	23.3328	22.4494	20.4312	24.6022	23.6126	25.3407	25.581	23.0396	25.3906
Q9JIA7	Sphk2	sphingosine kinase 2	24.5886	24.1603	24.2131	25.3062	24.1186	25.308	25.2342	25.3182	24.4636	25.7741
Q5DTY9	Kctd16	potassium channel tetramerisation domain containing 16	26.8598	27.2153	26.7329	26.8964	26.6667	26.0134	26.1742	26.714	26.3634	26.8637
A0A668KLA2	None	None	24.2601	24.8881	25.1632	25.0047	25.363	24.1877	23.6369	24.1163	24.8352	22.2808
Q91Z31	Ptbp2	polypyrimidine tract binding protein 2	27.9112	27.8976	27.8755	28.0472	27.2372	28.1406	28.81	28.0918	28.2761	28.0472
O35454	Clcn6	chloride channel, voltage-sensitive 6	22.8325	24.7165	25.1453	24.2797	24.701	25.7476	24.825	25.223	25.5485	25.5033
Q6P5F7	Ttyh3	tweety family member 3	21.9326	25.1429	25.6414	23.4468	24.6426	28.0144	25.7741	27.6664	24.6395	25.755
Q8BWF0	Aldh5a1	aldhehyde dehydrogenase family 5, subfamily A1	31.6014	31.7756	31.8921	31.8647	31.8438	31.6193	31.7682	31.6976	31.4246	31.4652
P84075	Hpca	hippocalcin	26.3233	24.6371	24.6559	26.1488	23.9203	27.0498	26.1117	26.9209	25.3209	27.7255
A2A5E1	None	None	23.9032	25.2537	24.9037	25.3306	28.5237	21.4108	23.0421	23.2649	25.0125	23.6629
O35344	Kpna3	karyopherin subunit alpha 3	27.0063	26.9069	26.9656	26.9839	26.8893	26.2777	26.5436	27.1267	26.3233	26.6541
A0A0N4SUV6	None	None	24.1603	23.476	25.2028	24.7837	23.0156	25.4228	25.3919	24.8055	24.8148	25.2501
P49813	Tmod1	tropomodulin 1	24.517	22.7438	24.1154	22.4086	23.859	25.7217	24.9037	26.0011	23.1124	25.9375
A0A1L1SSS4	None	None	21.7683	20.4312	20.4312	21.9703	20.4312	21.4108	23.6091	23.8797	20.9861	23.5065
A0A1Y7VN70	None	None	23.1996	21.9823	21.7578	22.0881	21.3464	24.0816	23.6475	22.4583	22.388	23.1378
P05064	Aldoa	aldolase A, fructose-bisphosphate	34.5728	34.5189	34.7685	34.5189	34.5728	34.4008	34.455	34.455	34.5189	34.5189
Q91VW3	Sh3bgrl3	SH3 domain binding glutamic acid-rich protein-like 3	26.714	27.3856	27.0587	26.0838	27.3867	26.1352	26.3416	25.1672	23.775	26.5392
Q99LE6	Abcf2	ATP-binding cassette, sub-family F member 2	24.201	22.3511	21.4864	25.3039	21.9578	24.4264	25.1898	24.4595	24.701	25.3107
A0A5H1ZRM8	Scn2a	sodium channel, voltage-gated, type II, alpha	29.684	29.1445	29.282	29.2111	29.2567	29.1465	28.857	29.1558	29.1079	29.0191
P24270	Cat	catalase	28.5396	28.6548	28.5696	27.7255	28.8681	28.3465	26.7129	26.8581	28.4514	26.9031
Q99LF4	Rtcb	RNA 2',3'-cyclic phosphate and 5'-OH ligase	28.161	28.0963	28.1914	28.4214	27.6957	27.7679	27.4084	27.8106	28.0539	27.6816
Q9JMG7	Hdgfl3	HDGF like 3	27.4691	27.1129	27.5687	27.6488	26.918	28.3032	27.403	27.7338	28.1551	27.6623
Q9CRB2	Nhp2	NHP2 ribonucleoprotein	23.7616	22.3553	22.6744	24.6133	21.782	23.651	24.4418	24.3452	24.6022	24.3994
A0A2R8VK79	None	None	24.4595	25.1042	24.4901	24.5626	25.9144	25.9773	26.4367	26.239	24.748	25.8354
P51150	Rab7	RAB7, member RAS oncogene family	30.103	30.045	29.8332	29.83	29.7312	30.1445	30.1314	30.2095	29.9995	30.0071
F8WJG3	Tra2b	transformer 2 beta	28.109	27.5117	28.0269	27.7367	27.9641	27.2386	27.159	27.0227	28.1199	26.4714
Q61768	Kif5b	kinesin family member 5B	29.0113	28.8878	28.8512	28.3659	28.8124	28.3993	28.247	28.1248	28.9018	28.1867
Q8BXZ1	Tmx3	thioredoxin-related transmembrane protein 3	27.6863	27.5899	27.7986	27.4511	27.8026	26.8964	27.3117	26.161	25.113	27.6161
Q3UVU3	Slc30a10	solute carrier family 30, member 10	20.475	20.4312	21.0508	20.4312	21.4925	21.4108	23.7367	21.5315	20.9674	22.3765
P62305	Snrpe	small nuclear ribonucleoprotein E	25.8678	25.3617	25.4776	25.755	24.9979	26.2248	26.3701	25.8107	25.433	26.3571
P56391	Cox6b1	cytochrome c oxidase, subunit 6B1	30.2796	30.2343	29.9023	30.2039	30.1484	30.3977	30.2254	30.5355	30.2039	30.6231
P62301	Rps13	ribosomal protein S13	28.6188	28.5396	28.857	28.847	28.4183	29.0496	28.7614	28.7236	29.0884	28.9622
Q60737	Csnk2a1	casein kinase 2, alpha 1 polypeptide	29.4176	29.4421	29.5385	29.6635	29.3311	29.6801	29.7196	29.546	29.6369	29.5625
Q80TL7	Mon2	MON2 homolog, regulator of endosome to Golgi trafficking	25.076	24.7456	25.8203	24.475	25.5559	24.7901	24.7491	24.3671	23.9806	24.4875
F7CPX0	None	None	23.4567	22.9214	22.3279	24.1047	22.5744	24.8999	24.4109	25.1602	22.5223	25.0567
Q60749	Khdrbs1	KH domain containing, RNA binding, signal transduction associated 1	26.8661	26.0454	26.4582	27.6682	26.4729	27.3481	27.9132	27.2743	26.9312	27.7604
Q63810	Ppp3r1	protein phosphatase 3, regulatory subunit B, alpha isoform (calcineurin B, type I)	27.1301	26.71	26.72	27.2908	27.0747	28.2216	27.7261	27.5532	26.6953	27.9884
O08919	Numbl	numb-like	28.3428	28.5696	28.3247	28.3203	28.8362	28.0679	28.0573	28.2863	28.4448	28.1018
Q66L44	Cbarp	calcium channel, voltage-dependent, beta subunit associated regulatory protein	24.0597	24.3702	25.8771	23.8283	24.1933	21.4108	21.1471	23.7714	23.407	24.2531
A0A0A0MQM0	None	None	28.6791	28.6898	28.3164	28.2544	28.8528	28.4085	27.957	28.3059	28.3993	27.9055
Q9Z2I9	Sucla2	succinate-Coenzyme A ligase, ADP-forming, beta subunit	31.7807	31.7286	31.8246	31.6413	31.8137	31.4652	31.7104	31.3234	31.7927	31.3546
Q9CR68	Uqcrfs1	ubiquinol-cytochrome c reductase, Rieske iron-sulfur polypeptide 1	30.5355	30.2095	30.4259	30.2981	30.6027	30.3674	30.0071	30.1698	30.26	30.2039
D3Z7E5	None	None	27.5392	27.2743	27.2663	27.2297	27.4432	27.1802	27.1382	27.1396	27.2871	27.2485
P26043	Rdx	radixin	28.754	28.6767	28.8591	28.7663	29.1046	28.4413	28.634	28.1356	28.9116	28.2805
H7BXB6	None	None	21.9611	20.4312	20.4312	26.0374	25.9599	25.4827	26.1215	26.3651	25.1986	26.2861
A0A0R4J049	Prmt5	protein arginine N-methyltransferase 5	27.5308	27.5263	27.3544	27.4009	27.0093	27.6533	27.6161	27.8333	27.7604	27.3648
P31230	None	None	29.9934	30.3247	30.1314	29.6883	30.4377	29.7604	29.5537	29.6299	30.1518	29.5014
Q08331	Calb2	calbindin 2	25.7681	26.6433	26.2664	27.1153	26.2488	27.785	27.1067	27.4884	26.14	27.8778
P0C192	Lrrc4b	leucine rich repeat containing 4B	26.4198	26.1236	25.873	26.1138	26.0597	26.6237	26.792	27.5687	25.9491	26.72
Q9CR95	Necap1	NECAP endocytosis associated 1	28.7568	28.9484	28.9553	28.5997	28.6686	29.4403	28.9356	29.135	28.7349	29.387
E9QLA5	Inf2	inverted formin, FH2 and WH2 domain containing	28.798	28.7127	28.847	26.6744	28.9672	28.7602	26.8581	26.6084	26.0934	26.57
O35682	Myadm	myeloid-associated differentiation marker	26.6404	26.3314	26.9031	25.9838	26.3723	27.3258	27.1356	26.7285	26.4471	27.0628
G3X9N3	Pnma8b	PNMA family member 8B	22.6066	22.2373	20.9861	22.872	20.45	22.9829	22.5544	23.1082	22.7181	23.2891
O88958	Gnpda1	glucosamine-6-phosphate deaminase 1	25.3357	25.0125	24.556	25.4808	25.1772	25.3337	22.9568	23.8008	23.5567	24.7944
P41241	Csk	c-src tyrosine kinase	22.2847	25.2558	25.034	24.72	23.6678	23.071	22.8585	22.6527	23.5455	22.2555
Q8K274	Fn3krp	fructosamine 3 kinase related protein	26.8116	26.6384	26.57	25.9791	26.353	26.1144	25.9951	25.4793	26.4729	25.0026
P97799	Nrsn1	neurensin 1	23.8513	23.4164	23.6475	20.4312	23.798	21.4108	21.1471	20.4312	22.8349	20.6289
Q9CQI3	Gmfb	glia maturation factor, beta	26.8988	25.9599	25.8505	26.2355	26.2259	26.3662	25.3588	24.8728	25.4793	25.7027
D3YYE1	None	None	26.6737	25.7797	26.4447	26.1151	25.9856	26.4694	24.3338	25.6614	25.3291	24.5194
A2RSJ4	Bltp3b	bridge-like lipid transfer protein family member 3B	25.1559	25.5137	26.3753	25.175	25.586	25.18	25.1226	25.0846	25.0647	24.2878
Q99JX4	Eif3m	eukaryotic translation initiation factor 3, subunit M	25.5295	23.9001	24.5909	25.7077	23.8351	25.7498	26.1393	25.9144	24.7536	26.3011
Q9DCU6	Mrpl4	mitochondrial ribosomal protein L4	25.0826	24.7811	23.6726	25.6155	23.299	25.0769	26.239	25.5516	25.2694	25.6047
O88343	Slc4a4	solute carrier family 4 (anion exchanger), member 4	23.0338	22.382	22.5796	20.4312	22.5978	24.2098	23.0302	23.6302	23.1148	22.8056
Q9EP72	Emc7	ER membrane protein complex subunit 7	25.4123	25.3978	25.734	25.8122	24.8135	26.5152	25.6678	25.8086	25.8298	25.8899
Q9CY27	Tecr	trans-2,3-enoyl-CoA reductase	28.0185	27.8153	27.7035	27.935	28.2719	27.6872	27.9143	27.4474	27.7624	27.2537
Q68FF6	Git1	GIT ArfGAP 1	29.1828	29.3212	29.2332	29.0149	29.12	28.8211	29.05	28.7852	29.2567	28.6933
P31324	Prkar2b	protein kinase, cAMP dependent regulatory, type II beta	30.7194	31.0203	31.2506	30.894	31.2163	31.4766	31.1929	31.4513	31.0052	31.5394
Q80ZM5	H1f10	H1.10 linker histone	23.9762	24.2521	25.1861	25.2475	24.0992	25.4154	25.903	25.4154	24.4468	25.6414
P61264	Stx1b	syntaxin 1B	32.0884	31.8647	32.019	31.7286	32.0728	31.9055	31.5919	31.7286	31.8438	31.7433
Q9QZE5	Copg1	coatomer protein complex, subunit gamma 1	25.8884	25.2625	25.5095	26.1634	25.2134	26.1389	25.7936	26.1033	25.9206	26.3416
Q9D0T1	Snu13	SNU13 homolog, small nuclear ribonucleoprotein (U4/U6.U5)	24.4368	25.7429	25.6173	25.23	25.1602	23.407	25.2152	20.4312	24.9706	20.6289
A0A5F8MPK9	None	None	28.2535	27.9489	27.8867	28.0756	28.1289	27.6082	28.1132	27.6917	27.4023	27.9378
P63046	Sult4a1	sulfotransferase family 4A, member 1	26.1117	25.1436	24.1186	26.3416	25.4035	21.4108	24.3928	25.0375	22.8936	24.7901
Q9CQI6	Cotl1	coactosin like F-actin binding protein 1	28.9018	29.1183	28.6467	28.4948	29.394	28.6304	28.7568	28.3415	28.3706	28.5067
Q91YM4	Tbrg4	transforming growth factor beta regulated gene 4	25.2374	25.4208	25.2586	25.9599	24.8413	25.5509	26.8031	25.1898	26.6527	26.6155
Q8R550	Sh3kbp1	SH3-domain kinase binding protein 1	23.8008	25.1861	24.7934	25.5357	24.507	24.7456	26.3984	25.4567	25.6259	26.0354
Q91Z69	Srgap1	SLIT-ROBO Rho GTPase activating protein 1	24.9733	25.848	25.4496	23.3993	25.7077	23.3936	23.6716	22.5851	25.5183	22.7438
A0A0R4J2B2	Kctd12	potassium channel tetramerisation domain containing 12	27.9756	28.0198	28.4026	28.1637	28.0185	27.7588	28.1484	27.9424	27.7087	27.8176
Q8VE70	Pdcd10	programmed cell death 10	25.8627	26.4742	25.8641	26.2595	26.1148	26.0704	26.9426	26.6097	26.3453	26.6566
Q3V460	Smim26	small integral membrane protein 26	24.2719	23.1292	23.1327	20.4312	23.2453	21.4108	21.1471	20.4312	22.5579	20.6289
Q9ES28	Arhgef7	Rho guanine nucleotide exchange factor	28.5894	28.6045	28.8233	28.2761	28.4413	28.0778	28.3193	28.247	28.5162	28.3247
Q8BPE4	Tmem177	transmembrane protein 177	23.9614	23.1082	24.0017	23.123	22.6257	25.1245	23.7201	23.352	24.4489	24.7536
O35382	Exoc4	exocyst complex component 4	27.663	27.5067	27.738	27.5853	27.479	27.5711	27.6731	27.9106	27.8014	27.9756
B1AZ46	Baiap2	brain-specific angiogenesis inhibitor 1-associated protein 2	30.9443	31.2834	31.4065	31.0953	30.9204	31.1698	31.3289	31.3709	31.5243	31.488
A2A5R2	Arfgef2	ADP ribosylation factor guanine nucleotide exchange factor 2	25.1279	26.2032	26.1018	26.5968	25.477	26.8074	26.63	25.9323	27.1531	26.564
P04627	Araf	Araf proto-oncogene, serine/threonine kinase	27.3099	27.2608	27.1568	27.086	26.9226	26.1018	26.298	26.3969	27.2398	27.114
A0A0A6YWT4	None	None	20.475	21.2441	20.4312	22.5261	20.4312	21.4108	23.8308	21.5199	22.2736	22.5151
Q7M729	Scn4b	sodium channel, type IV, beta	26.2595	26.0114	25.8086	26.3152	26.065	26.3508	25.2006	24.0451	24.0824	25.7578
F8WGT1	Ahcyl2	S-adenosylhomocysteine hydrolase-like 2	27.9069	28.1061	27.5199	26.9787	28.1289	27.3012	27.0628	26.8544	27.7061	26.6358
Q5RJI5	Brsk1	BR serine/threonine kinase 1	28.2578	28.644	28.5396	27.7612	28.3465	27.9112	27.8835	27.8153	28.2805	27.3386
Q9CRC9	Gnpda2	glucosamine-6-phosphate deaminase 2	23.826	24.7033	23.1044	25.2537	24.0939	23.9067	21.1471	22.0126	23.1277	23.7992
Q8BU88	Mrpl22	mitochondrial ribosomal protein L22	26.024	26.0821	26.2217	26.14	26.7713	24.9371	26.1144	25.7207	24.3269	26.0962
Q3UHL1	Camkv	CaM kinase-like vesicle-associated	31.1178	31.3081	31.498	31.3081	30.9798	31.3234	31.2717	31.7104	31.6547	31.6193
Q80YN3	Bcas1	brain enriched myelin associated protein 1	28.7191	28.9455	28.9242	28.7424	28.7101	28.3012	28.0648	28.1815	29.1046	27.3936
Q3TDK6	Rogdi	rogdi homolog	26.3605	26.2537	26.2595	26.8893	26.5336	26.8781	26.7279	27.1942	26.3909	27.4223
E9QQ10	Akap9	A kinase anchor protein 9	24.7332	23.1148	24.68	22.0155	22.2602	24.2123	21.1471	20.4312	20.4312	20.6289
Q3TZM9	Alg11	ALG11 alpha-1,2-mannosyltransferase	22.4259	22.5492	22.5851	20.4312	21.2831	21.4108	21.1471	20.4312	20.6337	20.6289
Q8C8T7	Elfn1	leucine rich repeat and fibronectin type III, extracellular 1	26.1893	25.8537	24.3593	23.6345	24.0733	21.4108	23.0156	20.4312	26.1018	20.6289
Q14C51	Ptcd3	pentatricopeptide repeat domain 3	24.1798	23.0941	23.4792	22.1372	23.702	23.7616	23.0338	25.6233	25.394	25.7589
P62849	Rps24	ribosomal protein S24	26.9198	26.4198	26.7511	26.8724	25.6126	27.1932	27.1571	27.0235	26.7643	27.1644
A0A2R8VKG2	None	None	27.4938	27.5836	27.6664	26.985	27.2811	26.109	26.7378	26.9656	27.6533	26.4861
D3YUM1	None	None	31.6091	31.5668	31.4513	31.704	31.488	31.551	31.8323	31.704	31.6976	31.7104
Q8JZQ9	Eif3b	eukaryotic translation initiation factor 3, subunit B	27.4009	27.0977	27.3503	27.1481	26.9603	27.4194	27.5963	27.1767	27.821	27.3903
Q8C4C4	Regma	None	22.7696	22.1947	22.7355	20.4312	22.614	24.8184	24.0393	24.4766	21.5516	23.5895
A0A498WGK6	None	None	22.861	23.3993	24.1486	22.2868	23.1299	24.7503	24.0102	24.1985	22.9937	24.4379
G5E829	Atp2b1	ATPase, Ca++ transporting, plasma membrane 1	31.8539	31.6673	31.7286	31.7104	31.7286	31.9193	31.762	31.9295	31.7286	31.9295
Q9Z1P6	Ndufa7	NADH:ubiquinone oxidoreductase subunit A7	30.5629	30.9204	30.6804	30.2405	30.7288	30.3316	30.1834	29.7999	30.7194	30.0926
Q9CQF0	Mrpl11	mitochondrial ribosomal protein L11	24.5867	24.34	25.3762	25.3226	23.6404	25.9537	25.848	25.2888	24.8235	25.426
O54781	Srpk2	serine/arginine-rich protein specific kinase 2	26.4447	26.2259	25.7291	25.3588	25.6872	27.1623	26.0316	26.5861	26.3437	26.244
A0A140LHR3	None	None	26.3508	24.8222	26.2537	25.9526	25.7846	25.3659	24.4379	24.5051	25.63	25.349
Q920Q4	None	None	25.7508	25.7273	26.0428	26.2681	25.7484	25.8537	26.4709	26.1517	26.4367	26.2636
P51881	Slc25a5	solute carrier family 25 (mitochondrial carrier, adenine nucleotide translocator), member 5	32.2292	31.9055	31.5243	32.2292	31.9635	32.4314	32.2035	32.4088	32.0355	32.3551
Q9QYS2	Grm3	glutamate receptor, metabotropic 3	29.2742	29.3008	29.2861	29.0552	29.4748	29.3147	29.3374	29.4946	29.595	29.6973
A2A547	Rpl19	ribosomal protein L19	27.7588	27.271	27.5263	27.2519	27.2175	26.9524	26.1749	25.9938	27.8293	26.4159
Q9CQ62	Decr1	2,4-dienoyl CoA reductase 1, mitochondrial	26.9708	26.735	26.8637	27.4183	26.6155	27.4455	27.6488	27.1481	27.0152	27.2224
P70670	Naca	nascent polypeptide-associated complex alpha polypeptide	26.5092	25.7846	25.8537	25.6444	25.5908	27.3343	28.7852	26.1289	25.848	27.0239
Q80YD1	Supv3l1	suppressor of var1, 3-like 1 (S. cerevisiae)	25.8435	26.2133	25.3324	26.2217	24.852	27.1129	26.0863	26.0714	26.3586	26.2675
Q8BGA9	Oxa1l	oxidase assembly 1-like	25.3386	25.8627	25.7498	24.8449	26.0011	24.9199	24.8974	23.9854	25.7858	24.2719
P27545	Cers1	ceramide synthase 1	24.5279	23.8869	23.0234	24.0351	22.0419	24.2508	25.1559	24.1703	24.1968	24.7738
E9Q6P5	Ttc7b	tetratricopeptide repeat domain 7B	27.0601	27.1842	27.6897	27.346	27.0472	27.5817	27.7061	27.7045	27.2598	28.4183
Q8BPM0	Daam1	dishevelled associated activator of morphogenesis 1	26.1424	24.4468	24.9055	23.8724	24.0703	21.4108	23.2961	24.2544	24.1775	23.4673
A0A0G2JER9	None	None	21.8526	24.6223	23.3377	25.4793	22.8737	25.5559	26.0666	24.9245	23.9833	25.2572
A0A0U1RNF2	None	None	25.7923	24.8352	25.4237	25.1531	25.5788	26.0392	25.4658	26.5353	25.4834	25.9694
Q8K0Z7	Taco1	translational activator of mitochondrially encoded cytochrome c oxidase I	26.4386	26.3233	25.7578	27.1246	26.0002	25.6988	26.0934	24.2689	25.9759	25.4228
P60867	Rps20	ribosomal protein S20	27.4194	27.3887	27.5532	28.3734	27.3955	27.9541	28.2863	27.9014	27.9424	28.169
P61358	Rpl27	ribosomal protein L27	28.4474	27.9838	28.4007	28.3111	27.7237	28.7505	28.1327	28.6229	28.6121	28.5628
Q8BXV2	Bri3bp	Bri3 binding protein	26.1265	25.8185	26.0923	26.2259	26.1688	26.4416	25.0781	24.1916	25.7863	24.7934
P56371	Rab4a	RAB4A, member RAS oncogene family	24.7137	25.6813	25.349	25.8546	25.6107	26.5445	26.2032	25.9931	25.2006	26.71
F6YVP7	None	None	29.4387	29.2961	29.0956	29.4157	28.917	29.546	29.5964	29.282	29.6001	29.372
Q91YS7	Map2k2	mitogen-activated protein kinase kinase 2	25.2006	25.0196	24.8164	25.972	24.776	25.6942	26.4802	25.7217	25.231	25.7321
O35945	Aldh1a7	aldehyde dehydrogenase family 1, subfamily A7	24.6621	24.0301	23.9578	24.6991	23.9941	26.6566	26.1647	24.8617	23.7098	25.5978
Q64521	Gpd2	glycerol phosphate dehydrogenase 2, mitochondrial	30.8269	30.8269	30.955	31.0311	30.6888	31.1398	31.0052	31.1607	30.7987	31.1967
A0A1L1SQE2	None	None	27.2743	28.81	27.986	27.7126	28.1149	25.0345	27.5283	26.7461	28.2739	25.6259
Q9JIP4	Panx1	pannexin 1	23.1299	21.9928	22.4413	22.4512	22.2437	23.7949	24.0217	22.8897	22.12	23.4834
P10126	Eef1a1	eukaryotic translation elongation factor 1 alpha 1	32.5477	32.3749	32.2695	32.3419	32.2292	32.1519	32.1519	32.1295	32.3419	32.2738
O35963	Rab33b	RAB33B, member RAS oncogene family	25.1264	24.0829	23.8626	20.4312	24.3889	21.4108	21.1471	21.4894	23.4526	20.6289
P42125	Eci1	enoyl-Coenzyme A delta isomerase 1	26.3167	26.4767	25.903	26.1018	26.5392	27.1942	26.4386	26.5579	26.7502	26.3586
Q8BH44	Coro2b	coronin, actin binding protein, 2B	28.9864	28.7908	28.8055	28.4026	29.0956	29.1071	29.0226	29.1838	29.1784	28.9149
Q07079	Igfbp5	insulin-like growth factor binding protein 5	22.8056	23.593	20.4312	23.3936	22.4413	21.4108	21.1471	20.4312	22.3133	20.6289
Q9DBL7	Coasy	Coenzyme A synthase	27.5263	27.5228	26.9728	27.5775	27.2733	27.4585	27.9775	27.7035	27.4528	27.8934
A0A991EPK0	None	None	29.3239	29.995	29.8735	29.5562	30.2447	29.7007	29.7086	29.1756	28.9095	29.1558
Q9CR76	Tmem186	transmembrane protein 186	23.1378	23.4026	23.7874	24.0597	23.8971	23.0501	21.1471	21.1851	21.4925	24.4806
Q9D1F0	Rtl8a	retrotransposon Gag like 8A	22.1693	20.4312	20.9413	21.553	21.4379	21.4108	23.0251	22.5492	22.0574	25.7846
Q4VA53	Pds5b	PDS5 cohesin associated factor B	21.7578	20.4312	20.6289	23.995	20.4312	23.364	22.5406	21.9326	23.5134	23.6653
P32233	Drg1	developmentally regulated GTP binding protein 1	24.0673	22.5643	23.5234	24.7791	22.7696	24.8263	23.6665	24.3152	24.5909	25.6126
O08599	Stxbp1	syntaxin binding protein 1	34.0032	33.9265	33.96	33.96	34.0032	33.8037	33.96	33.9265	33.96	33.8458
P49442	Inpp1	inositol polyphosphate-1-phosphatase	25.6593	26.7023	26.8893	25.3789	26.6541	26.1265	24.2027	25.5053	25.3182	25.6198
F7B0R9	None	None	25.3884	25.097	20.4312	24.3671	25.1784	21.4108	21.1471	20.4312	20.4312	24.6371
A0A286YDH6	None	None	26.1177	25.8771	25.1542	26.024	24.9371	26.3365	26.6737	26.1847	25.5033	26.7643
Q6P1F6	Ppp2r2a	protein phosphatase 2, regulatory subunit B, alpha	29.3186	29.5485	29.236	29.4092	29.3147	29.3784	29.684	29.4593	29.5683	29.4946
A0A338P7E0	None	None	24.2131	24.6133	24.5023	20.4312	23.395	23.8797	21.1471	20.4312	20.8235	20.6289
Q6PCP5	Mff	mitochondrial fission factor	25.8302	26.3295	26.5181	26.0821	26.8116	24.5965	26.0002	25.9313	25.6098	26.1273
O70566	Diaph2	diaphanous related formin 2	24.5051	23.0368	24.7018	24.4161	25.6259	21.4108	21.1471	20.4312	25.7236	23.074
F8WJ51	None	None	24.7751	25.9686	26.2032	26.1221	25.6414	26.1533	26.4941	26.8269	25.7994	26.6883
Q00915	Rbp1	retinol binding protein 1, cellular	22.1083	22.5923	24.2544	21.5199	24.4307	23.3233	21.1471	21.4864	20.4312	20.6289
Q99LC8	Eif2b1	eukaryotic translation initiation factor 2B, subunit alpha	22.2868	20.6289	20.6289	21.3617	20.6289	21.4108	22.9086	20.8235	23.1378	23.5545
Q8CGC7	Eprs1	glutamyl-prolyl-tRNA synthetase 1	29.5862	29.394	29.4977	29.921	29.5438	29.1429	28.8073	29.1638	29.6973	29.3896
Q9WUA6	Akt3	thymoma viral proto-oncogene 3	25.9951	27.7402	28.2961	26.5553	27.8976	25.0125	26.463	26.4703	26.482	26.6771
P70336	Rock2	Rho-associated coiled-coil containing protein kinase 2	28.7737	29.1014	29.2667	28.8512	29.1079	28.4431	28.3164	28.9095	29.0815	28.6467
Q921L3	Tmco1	transmembrane and coiled-coil domains 1	26.2649	25.6944	26.2091	25.4228	25.7649	25.674	25.6796	24.9621	24.952	25.6796
P09242	Alpl	alkaline phosphatase, liver/bone/kidney	20.475	23.2199	22.2373	22.493	20.6289	21.4108	24.1968	23.5833	24.2027	23.1802
E9PX38	Pde8b	phosphodiesterase 8B	24.6133	24.859	25.0867	23.6915	24.7503	21.4108	23.5109	23.7588	25.0185	22.8737
Q3TCD4	None	None	27.3043	27.329	27.3022	27.0656	26.9558	27.6502	27.0723	27.5364	27.3715	27.7699
Q3USX9	None	None	24.3033	24.9425	25.5392	29.1111	25.2152	24.3079	21.1471	24.6562	24.6456	23.5261
Q91V57	Chn1	chimerin 1	24.7076	23.0234	24.7804	23.4041	25.1226	21.4108	21.1471	24.3079	24.3551	20.6289
O88307	Sorl1	sortilin-related receptor, LDLR class A repeats-containing	24.7491	21.9578	23.791	20.4312	22.3011	24.6022	24.5314	24.6371	23.6752	23.6739
P62843	Rps15	ribosomal protein S15	26.663	26.8186	27.1235	26.5282	24.918	26.8893	27.8961	27.7727	26.7602	27.2519
Q8JZP2	Syn3	synapsin III	30.6856	30.3513	30.2796	29.9285	30.7567	30.2291	30.1233	29.4169	30.2981	29.5601
P48024	Eif1	eukaryotic translation initiation factor 1	23.6629	22.5223	20.4312	24.3551	23.8441	24.2222	24.3008	24.6075	24.128	24.6843
P56564	Slc1a3	solute carrier family 1 (glial high affinity glutamate transporter), member 3	31.2096	31.1698	31.4652	31.2834	31.2351	31.345	31.6333	31.551	31.2022	31.7286
Q6NS65	Gpr17	G protein-coupled receptor 17	22.8897	20.4312	20.4312	20.4312	23.2053	25.5674	21.1471	23.2579	22.7602	24.776
Q9QYB1	Clic4	chloride intracellular channel 4	25.171	24.7356	23.5134	23.2826	25.6918	24.7053	21.1471	23.7315	20.4312	23.0878
Q9WTR1	Trpv2	transient receptor potential cation channel, subfamily V, member 2	25.7236	25.0957	24.4976	25.696	25.8599	25.7047	25.6392	31.2834	30.7461	26.3848
P28740	Kif2a	kinesin family member 2A	29.9365	29.6744	30.0505	29.6703	29.9365	29.6211	29.5485	29.3165	29.995	29.3311
Q9R1Q8	Tagln3	transgelin 3	27.8333	28.3879	28.8415	27.9227	28.754	27.9168	27.3022	27.8735	28.2381	27.8459
Q99JX7	Nxf1	nuclear RNA export factor 1	20.475	20.4312	23.6716	20.4312	20.4312	21.4108	23.4136	23.817	22.0303	22.5643
Q3TPE9	Ankmy2	ankyrin repeat and MYND domain containing 2	26.0516	25.9393	25.5062	26.3622	25.7321	26.0516	25.0957	25.2064	25.4929	25.546
Q9JHU9	Isyna1	myo-inositol 1-phosphate synthase A1	26.0806	27.4938	27.2916	26.9973	26.9497	26.9842	27.5319	28.0778	27.4764	27.738
Q6GT24	Prdx6	peroxiredoxin 6	27.8153	27.9997	27.346	27.491	27.5853	28.1509	27.5067	28.1389	28.0105	28.1071
Q6PAK3	Prmt8	protein arginine N-methyltransferase 8	26.7074	26.5901	26.0962	26.3054	26.0806	25.1588	26.1018	26.1502	25.4228	26.3365
P00416	COX3	cytochrome c oxidase subunit III	27.9541	27.7679	28.2197	27.8018	28.9569	24.6182	27.5836	27.6142	23.6048	28.0159
K3W4T3	None	None	32.1355	32.1934	32.3135	32.1791	32.2035	32.3862	32.2864	32.3749	32.1519	32.3419
P17751	Tpi1	triosephosphate isomerase 1	33.3055	33.5059	33.4689	32.9598	33.6295	32.9018	33.0283	32.5322	33.5575	32.8201
D3YUP1	None	None	23.6219	23.0396	23.4376	24.0134	22.8282	24.9223	25.2242	25.2661	22.6015	24.2806
Q9CZY3	Ube2v1	ubiquitin-conjugating enzyme E2 variant 1	27.4585	27.1076	26.6953	26.4883	27.6682	27.4528	25.4583	26.3416	26.4307	25.2221
P62897	Cycs	cytochrome c, somatic	30.1895	30.1533	29.847	30.2375	29.7354	28.8899	29.9127	29.3374	30.048	29.6744
Q80T41	Gabbr2	gamma-aminobutyric acid type B receptor subunit 2	26.706	27.1623	27.2571	26.128	27.1323	26.6224	25.7854	26.4893	26.7366	25.9611
E9PWP9	Spata31e2	spermatogenesis associated 31 subfamily E member 2	25.5127	25.3762	25.6126	20.4312	25.664	25.6918	21.1471	20.4312	20.4312	20.6289
E9PYG6	Rasa1	RAS p21 protein activator 1	24.0939	25.137	23.9177	25.2418	25.0196	24.9717	25.5428	25.1279	26.2227	25.113
P30416	Fkbp4	FK506 binding protein 4	28.8878	28.8343	28.6051	28.2615	28.5143	28.3502	28.2673	27.8813	28.754	27.6664
Q80ZJ6	Zer1	zyg-11 related, cell cycle regulator	23.9973	23.9203	23.9078	22.4182	23.4383	23.896	24.0462	23.9762	24.7677	24.3171
A0A1Y7VK76	Crppa	CDP-L-ribitol pyrophosphorylase A	22.9937	21.8995	23.2453	22.2186	22.4494	23.3688	24.1434	23.0272	22.614	23.1454
Q8C0Q9	Rapgef5	Rap guanine nucleotide exchange factor (GEF) 5	23.906	24.8565	23.7735	20.4312	22.8564	21.4108	21.1471	20.4312	23.2679	20.6289
O08529	Capn2	calpain 2	27.6305	27.6863	27.5775	27.9775	27.8813	26.2392	26.5449	27.7746	26.8521	27.943
P47754	Capza2	capping actin protein of muscle Z-line subunit alpha 2	29.8366	29.9627	30.0969	30.2213	29.894	30.1834	30.2672	30.5013	29.8816	30.5128
Q9CZJ2	Hspa12b	heat shock protein 12B	25.1898	24.8617	25.1986	25.8994	24.5841	25.606	25.9439	25.4285	25.4658	25.63
F6Y0S3	None	None	28.8188	29.1268	29.1014	28.9705	28.5346	27.6703	28.4849	28.6467	29.0496	28.2018
Q9EPU0	Upf1	UPF1 regulator of nonsense transcripts homolog (yeast)	27.6287	27.2247	27.8631	27.5427	27.1235	27.5614	27.8445	27.9884	27.8895	27.6382
Q61016	Gng7	guanine nucleotide binding protein (G protein), gamma 7	26.0011	26.9644	25.8412	25.7458	26.5494	27.7624	27.7402	27.2663	25.4752	27.7402
P16330	Cnp	2',3'-cyclic nucleotide 3' phosphodiesterase	32.6128	32.2625	31.8438	32.4653	32.3419	32.1355	31.9193	31.8438	32.2625	31.8539
Q99N84	Mrps18b	mitochondrial ribosomal protein S18B	25.3107	24.952	23.855	24.2369	25.3762	24.1015	24.7332	21.1925	23.9142	23.1148
B1AT82	Prpsap1	phosphoribosyl pyrophosphate synthetase-associated protein 1	24.8122	26.1265	25.2144	25.7027	25.1844	25.8185	26.1508	25.5816	25.84	26.1018
Q8R4E6	Purg	purine-rich element binding protein G	22.2555	22.5978	20.4312	24.7456	22.2666	24.3365	25.2914	25.1844	21.7101	25.1961
Q6PA06	Atl2	atlastin GTPase 2	26.0472	26.6198	26.9603	26.9524	27.3071	27.2756	27.1568	27.0691	27.2519	27.2349
Q8C413	Dgkg	diacylglycerol kinase, gamma	23.3621	23.2099	20.4312	24.5194	20.4312	23.7397	24.1351	23.8403	23.9032	24.5522
Q5SS80	Dhrs13	dehydrogenase/reductase 13	25.7976	26.109	26.4269	25.6076	25.2753	25.581	25.8196	24.4612	24.8222	25.4163
A0A338P6U4	None	None	24.2677	25.2643	24.5825	23.0878	24.556	21.4108	24.8606	20.4312	23.2649	23.4164
A0A0F6AIX5	Ldah	lipid droplet associated hydrolase	24.1532	24.2562	25.2418	24.2521	24.6874	23.9854	24.2952	23.8837	24.3622	23.8308
Q99JY9	Actr3	ARP3 actin-related protein 3	30.26	30.2291	30.4726	30.2796	30.3872	30.1504	30.2223	30.2142	30.252	30.2938
Q9JHS4	Clpx	caseinolytic mitochondrial matrix peptidase chaperone subunit	24.1434	25.2109	23.916	21.4894	23.8869	21.4108	21.1471	21.9449	24.5796	20.6289
F7BJK1	None	None	27.7126	28.5941	28.5941	28.3012	28.674	28.644	28.8149	28.7678	28.5185	29.0496
Q3UJP5	Cfap418	cilia and flagella associated protein 418	24.7594	25.2152	23.9731	24.6302	25.0319	21.4108	21.1471	25.52	24.5139	22.4182
Q9CQ54	Ndufc2	NADH:ubiquinone oxidoreductase subunit C2	27.9808	28.0315	28.3906	28.7777	28.1637	28.798	29.0258	28.8681	27.985	28.9915
Q8BG32	Psmd11	proteasome (prosome, macropain) 26S subunit, non-ATPase, 11	28.2961	28.6615	28.1867	28.7491	28.0499	28.9647	29.7374	28.9825	28.2018	28.7678
Q9D6K8	Fundc2	FUN14 domain containing 2	26.2032	25.3884	25.7936	26.8355	26.4969	26.4677	27.7945	26.5223	26.3023	27.357
Q8BGT5	Gpt2	glutamic pyruvate transaminase (alanine aminotransferase) 2	25.7661	24.6972	25.4123	25.7649	25.1919	23.9472	24.2689	23.5821	25.6354	25.2095
Q5FWK3	Arhgap1	Rho GTPase activating protein 1	28.7276	28.5881	28.6579	28.5294	28.723	29.12	28.9074	29.1046	28.383	29.1313
O08688	Capn5	calpain 5	26.9669	26.5851	26.7285	27.2014	26.3335	27.0304	27.346	27.403	26.6358	27.4764
P03888	ND1	NADH dehydrogenase subunit 1	27.5532	27.2398	27.2811	27.5473	27.0459	27.9124	27.8462	27.4674	27.198	28.3333
A0A3B2WCW9	None	None	22.8689	23.3838	23.1996	23.9472	23.2874	23.1082	21.1471	22.2472	22.6527	23.3993
P50396	Gdi1	GDP dissociation inhibitor 1	31.5668	31.5394	31.5754	32.0428	31.5754	31.8539	32.0728	32.4501	31.4766	32.4314
S4R2T7	None	None	26.6541	26.5984	26.4957	25.5369	26.7502	26.4582	25.4632	25.3687	26.228	25.4929
Q8C0I1	Agps	alkylglycerone phosphate synthase	25.5739	25.8175	26.0704	25.1772	25.5183	26.1128	25.84	26.1221	26.4742	25.6114
P46096	Syt1	synaptotagmin I	32.4653	32.4501	32.4501	32.6426	32.1791	32.6426	32.6128	32.695	32.4088	32.7058
P62743	Ap2s1	adaptor-related protein complex 2, sigma 1 subunit	28.9242	28.4128	28.8959	28.9647	28.9095	29.2742	29.0325	29.2111	28.723	29.2712
P17563	Selenbp1	selenium binding protein 1	24.6382	24.5538	25.0375	24.1434	24.2177	24.9863	23.6147	21.1044	23.9188	22.382
Q61598	Gdi2	GDP dissociation inhibitor 2	32.2625	32.101	32.1934	32.3135	32.101	32.2625	32.3419	32.3862	32.1669	32.5477
A0A0A6YW80	None	None	24.4209	24.6575	24.6101	25.0879	24.6149	22.887	22.5744	24.534	24.5023	24.534
Q9D031	Rsu1	Ras suppressor protein 1	25.4305	25.8298	25.5525	25.6126	25.9751	25.0781	24.7018	25.433	25.7417	25.4802
Q8CFX3	Pcdh1	protocadherin 1	22.3352	20.4312	24.6342	25.52	24.0869	24.2562	25.2865	26.6414	24.1798	26.9173
O88441	Mtx2	metaxin 2	23.6686	23.4792	20.4312	22.8585	20.4312	25.0172	23.5786	22.4868	23.5008	24.2952
Q8R1Q8	Dync1li1	dynein cytoplasmic 1 light intermediate chain 1	28.917	28.9569	29.1135	28.9381	28.9381	29.4286	29.247	29.6863	28.6615	29.6492
Q8BMF4	Dlat	dihydrolipoamide S-acetyltransferase	30.7856	30.9618	30.7937	31.4159	30.8488	31.2163	31.5668	31.3081	30.8488	31.551
P47955	Rplp1	ribosomal protein lateral stalk subunit P1	20.475	24.0784	24.1877	25.171	20.4312	26.2681	25.8233	24.3758	23.5429	24.9945
Q5SUR0	Pfas	phosphoribosylformylglycinamidine synthase (FGAR amidotransferase)	24.048	21.8771	22.6501	23.859	23.1661	21.4108	21.1471	24.2952	20.4312	20.6289
P62320	Snrpd3	small nuclear ribonucleoprotein D3	27.403	26.5092	26.7444	26.958	26.514	27.851	27.6142	27.2572	26.6404	27.2807
Q91YN0	D6Wsu163e	DNA segment, Chr 6, Wayne State University 163, expressed	22.851	22.2223	20.6289	24.524	21.2626	23.0941	23.6208	24.2918	23.576	23.593
Q9R062	Gyg1	glycogenin 1	23.9595	22.7369	24.0322	23.916	23.0722	21.4108	21.1471	23.2763	22.4946	23.8351
F8VPN4	Agl	amylo-1,6-glucosidase, 4-alpha-glucanotransferase	28.4244	29.0724	27.5083	28.2673	27.6906	27.3903	27.4313	27.3366	27.4432	28.2508
Q8R123	Flad1	flavin adenine dinucleotide synthetase 1	24.7033	23.6773	24.5934	24.0173	25.0355	24.8352	24.1365	22.6066	20.6289	22.4966
P14211	Calr	calreticulin	29.4169	29.6429	29.4157	29.3784	29.2961	29.2451	28.8667	29.6075	29.1417	28.7101
Q8VHI6	Wasf3	WASP family, member 3	27.4183	27.5145	27.6748	27.1043	27.5473	26.5914	25.097	26.8481	27.8719	26.5374
G3X9A7	Plcxd3	phosphatidylinositol-specific phospholipase C, X domain containing 3	26.7378	26.0194	25.9465	26.9812	25.8695	27.0415	27.3258	26.8724	26.0962	27.2001
Q80UU9	Pgrmc2	progesterone receptor membrane component 2	23.074	25.0506	24.339	24.028	25.2263	24.8804	25.0567	25.1559	24.8804	25.6276
O35566	Cd151	CD151 antigen	20.475	24.6075	20.4312	23.9941	20.4312	21.4108	25.3535	24.756	24.8565	24.7988
A3KGU5	Sptan1	spectrin alpha, non-erythrocytic 1	23.9854	23.8351	23.9142	23.0789	23.2311	25.2625	24.606	23.781	23.4834	24.3671
P70207	Plxna2	plexin A2	25.406	25.2274	25.5485	24.0393	25.5075	25.7067	25.9296	26.0618	25.5006	25.4305
Q80U23	Snph	syntaphilin	27.4389	28.1722	27.7148	27.8813	27.9775	27.3366	27.6872	27.3022	27.9227	27.1967
P59999	Arpc4	actin related protein 2/3 complex, subunit 4	28.8899	28.93	28.5294	29.2428	28.6992	29.5293	29.3856	29.7374	28.4244	29.9127
P59708	Sf3b6	splicing factor 3B, subunit 6	25.0781	24.2491	24.3758	24.534	24.5503	21.4108	24.7456	23.9203	24.2098	20.6289
P10922	H1f0	H1.0 linker histone	29.8958	29.9078	29.6863	28.4609	29.6635	28.3247	28.644	27.9143	30.0217	28.4913
Q62376	Snrnp70	small nuclear ribonucleoprotein 70 (U1)	28.3142	27.0437	27.5067	27.8881	28.0584	26.7279	27.3503	27.6618	27.3887	27.1235
Q8C0L0	Tmx4	thioredoxin-related transmembrane protein 4	25.696	25.3298	23.8986	24.9462	24.6075	30.1233	26.7169	25.5324	25.0036	26.0923
P63038	Hspd1	heat shock protein 1 (chaperonin)	32.5625	32.9242	33.0283	32.7058	32.7928	32.4653	32.6689	32.7399	32.6835	32.5625
Q9R1P1	Psmb3	proteasome (prosome, macropain) subunit, beta type 3	27.0786	26.3069	26.5407	27.6987	26.893	27.7887	27.8378	27.9121	26.4582	28.059
O08583	Alyref	Aly/REF export factor	26.6291	26.9839	26.3571	27.5247	26.6404	27.0382	27.4554	27.0933	27.4389	27.1615
Q9D338	Mrpl19	mitochondrial ribosomal protein L19	25.9751	25.9206	26.0821	25.7578	25.8435	25.8678	25.2393	25.3864	25.9791	25.6944
A2AP88	Zc3h6	zinc finger CCCH type containing 6	26.6265	26.1749	26.3969	26.4416	26.6335	21.4108	26.2602	26.1893	20.4312	25.9313
Q8C031	Lrrc4c	leucine rich repeat containing 4C	23.2649	20.4312	23.6678	23.5031	22.4086	24.4209	24.4439	24.5456	22.2868	24.507
E9PX52	Asap2	ArfGAP with SH3 domain, ankyrin repeat and PH domain 2	23.9494	26.0923	24.6963	24.9187	26.2424	23.163	25.308	23.647	21.5564	24.8352
Q99JW4	Lims1	LIM and senescent cell antigen-like domains 1	24.914	25.1632	24.7911	25.1291	25.4752	24.6978	24.7594	22.8202	24.8292	20.6289
Q9D0K2	Oxct1	3-oxoacid CoA transferase 1	32.5849	32.5849	32.6689	32.3749	32.6689	32.2864	32.501	32.4314	32.6128	32.1934
F8VPX1	Usp7	ubiquitin specific peptidase 7	26.2777	26.8017	26.8739	27.142	27.1942	25.0059	26.3437	26.6612	26.7136	26.298
H7BX46	Arhgap39	Rho GTPase activating protein 39	24.9665	26.6224	25.7672	25.1176	25.5663	23.299	24.7292	24.1775	26.181	24.5182
E9QB01	Ncam1	neural cell adhesion molecule 1	24.1559	26.453	23.0084	27.1946	23.8513	26.8399	25.3659	27.479	25.8994	27.5614
P62331	Arf6	ADP-ribosylation factor 6	26.8618	26.788	26.239	26.4845	26.5353	27.1267	25.6294	26.024	25.6213	25.6015
P67984	Rpl22	ribosomal protein L22	28.1051	27.2061	27.5978	27.4432	26.985	28.4053	27.9471	27.9124	27.6852	27.5872
Q5SUC9	Sco1	SCO1 cytochrome c oxidase assembly protein	24.5825	24.4281	23.9806	20.4312	23.4834	21.4108	21.1471	20.4312	24.0217	20.6289
B0QZW1	Gria3	glutamate receptor, ionotropic, AMPA3 (alpha 3)	27.1668	27.0403	27.2411	27.3359	26.9959	27.2485	27.124	27.3837	27.4474	27.3629
P62082	Rps7	ribosomal protein S7	28.8029	28.3312	28.9149	29.327	28.049	28.8257	29.3197	29.1247	29.1828	29.1784
Q0VF62	Bcas3	BCAS3 microtubule associated cell migration factor	28.2508	27.0952	27.8895	26.8956	27.0205	26.3254	26.8956	27.0786	27.2565	26.7008
Q9JI19	Fibp	fibroblast growth factor (acidic) intracellular binding protein	23.5545	24.95	24.952	24.6371	24.2049	25.2661	24.7683	24.9979	24.6182	25.5109
Q7TMM9	Tubb2a	tubulin, beta 2A class IIA	32.6426	32.839	32.6426	33.096	32.7608	33.222	32.7608	33.222	32.839	33.1247
Q11011	Npepps	aminopeptidase puromycin sensitive	30.3316	30.4674	30.3741	30.8544	30.3579	30.6575	30.8126	30.9502	30.3674	30.9341
Q569Z6	Thrap3	thyroid hormone receptor associated protein 3	27.0152	27.3707	26.7567	26.5234	27.5652	21.4108	26.0618	26.8676	27.2048	22.9214
Q9JI91	Actn2	actinin alpha 2	30.2501	30.2938	30.3832	30.2761	30.1257	30.2761	30.2735	30.5235	30.3741	30.5166
Q9Z0S1	Bpnt1	3'(2'), 5'-bisphosphate nucleotidase 1	23.3578	22.2437	21.9228	23.3448	22.0246	23.8308	23.5805	23.3501	22.3352	23.5978
Q4VA93	Prkca	protein kinase C, alpha	28.6263	28.4224	28.3879	28.546	27.8459	28.546	27.7578	27.462	28.2597	27.2621
A0A1B0GT94	Sorcs1	sortilin-related VPS10 domain containing receptor 1	20.475	20.4312	21.965	21.4108	20.4312	24.0351	22.8439	21.4277	20.4312	22.3133
Q9JME5	Ap3b2	adaptor-related protein complex 3, beta 2 subunit	30.2039	30.2796	30.1484	30.2254	30.1834	29.9934	30.0553	30.252	30.1484	30.1398
A2AGR0	Madd	MAP-kinase activating death domain	29.387	29.387	29.4308	29.1809	29.4259	28.9584	29.1079	29.05	29.5347	29.1579
P22723	Gabrg2	gamma-aminobutyric acid type A receptor, subunit gamma 2	26.6433	26.4969	27.0326	26.0904	26.7866	26.6883	26.2848	26.0327	26.1326	26.1151
Q922Q4	Pycr2	pyrroline-5-carboxylate reductase family, member 2	27.9227	27.8961	27.5853	27.6872	27.7499	27.9366	27.9069	27.9723	27.7679	27.9227
P24668	M6pr	mannose-6-phosphate receptor, cation dependent	24.1916	23.2649	25.8215	24.752	25.3298	25.7716	25.2694	25.4695	25.2064	25.9247
P68510	Ywhah	tyrosine 3-monooxygenase/tryptophan 5-monooxygenase activation protein, eta polypeptide	31.4337	31.337	31.5036	31.2163	31.8539	31.5243	30.8785	31.1967	31.1607	31.2226
Q8BQS4	Eeig2	EEIG family member 2	20.475	22.5744	22.8585	22.658	20.4312	21.4108	23.8797	23.2855	23.0134	23.9721
P17742	Ppia	peptidylprolyl isomerase A	32.0546	31.9854	32.1669	32.2738	32.3749	32.5849	32.2292	32.6689	32.0546	32.5849
Q9CXY9	Pigk	phosphatidylinositol glycan anchor biosynthesis, class K	22.5851	21.2031	22.8768	22.1149	22.1508	23.5402	24.506	23.0454	21.324	24.3269
P16254	Srp14	signal recognition particle 14	24.9055	21.3957	22.2666	24.8241	22.7143	25.1199	24.6526	24.1105	24.5538	24.2661
Q0VF51	Rims2	regulating synaptic membrane exocytosis 2	25.1784	26.706	25.8546	25.2374	25.6937	23.1454	25.2933	24.7018	26.1265	24.1831
A0A1B0GRV0	Bpnt1	3'(2'), 5'-bisphosphate nucleotidase 1	28.7491	28.3938	28.7301	29.0303	29.0864	28.8073	28.3432	28.6121	28.2544	28.5346
Q3UN04	Usp30	ubiquitin specific peptidase 30	23.817	24.6857	20.6289	24.1996	24.6182	21.4108	22.8737	20.9861	23.5081	20.6289
Q91VW5	Golga4	golgin A4	26.3662	20.4312	24.2753	24.9255	24.8122	21.4108	21.1471	25.1734	20.4312	20.6289
S4R2U7	None	None	28.5644	28.5644	28.7066	28.375	28.6499	28.3611	29.1838	29.0956	28.9455	28.7127
P69566	Ranbp9	RAN binding protein 9	24.0784	23.6665	24.732	25.2242	20.6289	25.0506	25.4793	25.0623	25.0506	25.034
Q9JM63	Kcnj10	potassium inwardly-rectifying channel, subfamily J, member 10	26.8567	27.4528	25.7661	26.8097	27.5319	25.0201	26.836	26.2392	26.3651	26.0019
Q9CZN7	Shmt2	serine hydroxymethyltransferase 2 (mitochondrial)	27.3837	27.2175	27.2629	27.8895	27.2014	26.6744	26.7329	27.1881	27.4206	27.1881
F6ULV5	None	None	25.3407	28.0159	28.1433	27.832	28.2673	21.4108	27.8341	27.8462	25.1245	20.6289
P68181	Prkacb	protein kinase, cAMP dependent, catalytic, beta	29.8432	29.3239	29.6272	29.5625	29.2528	29.7971	29.755	29.6369	30.073	29.5819
A0A494B931	None	None	28.8528	28.6392	28.8899	27.9786	29.2111	28.6121	28.3226	27.785	28.5758	27.8176
P62918	Rpl8	ribosomal protein L8	29.595	28.9622	29.247	29.1838	28.9957	28.7823	29.197	28.9242	29.0507	28.7777
Q6XE40	Mpp3	membrane protein, palmitoylated 3 (MAGUK p55 subfamily member 3)	27.1289	26.7665	26.4291	26.9461	27.3022	26.7329	26.3152	26.3753	24.6223	26.7378
P62823	Rab3c	RAB3C, member RAS oncogene family	29.4092	29.3617	29.6662	29.5201	29.1756	29.9627	29.6429	29.7857	29.2585	29.7741
Q6PHU5	Sort1	sortilin 1	23.2763	24.2131	24.7165	24.2677	24.752	24.9037	24.4264	26.1177	24.2878	25.308
P67778	Phb1	prohibitin 1	28.3975	27.8813	27.8976	28.0357	28.0573	29.0113	28.3373	28.4413	27.8184	28.5779
P60122	Ruvbl1	RuvB-like AAA ATPase 1	27.6355	27.9055	27.5283	27.4727	27.3503	27.9014	28.0987	27.6793	27.7338	27.6209
V9GWT6	None	None	28.0144	28.0472	28.2673	27.7699	28.2544	26.7444	27.3412	27.8895	28.3502	27.491
P43276	H1f5	H1.5 linker histone, cluster member	28.1995	28.2761	28.2883	28.1932	28.2197	28.0294	28.1914	27.6957	28.3415	27.4389
P13020	Gsn	gelsolin	28.3637	28.005	28.2381	27.9439	27.5817	28.213	27.6	27.3856	27.6906	27.4884
H7BX90	Grip1	glutamate receptor interacting protein 1	20.475	21.1695	22.4966	23.5065	22.5878	21.4108	21.1471	21.4576	20.4312	20.6289
P12658	Calb1	calbindin 1	20.475	22.3608	20.4312	22.3588	20.4312	24.4695	21.1471	21.8154	22.1774	23.0338
Q0VBD0	Itgb8	integrin beta 8	25.3209	25.3511	25.6162	25.8041	25.9975	24.5538	21.1471	24.6395	25.9938	24.5051
Q9Z2D6	Mecp2	methyl CpG binding protein 2	28.5346	28.7301	28.5779	28.9455	28.6017	28.2667	28.4352	27.9287	28.8528	26.8997
P68040	Rack1	receptor for activated C kinase 1	29.8332	29.1809	29.4387	29.9127	28.8512	30.631	29.7162	30.0669	29.4092	29.921
O70161	Pip5k1c	phosphatidylinositol-4-phosphate 5-kinase, type 1 gamma	30.631	29.3823	29.3971	29.2332	29.5485	29.1828	28.7505	29.1313	29.4358	29.236
Q9QXB9	Drg2	developmentally regulated GTP binding protein 2	25.1734	24.6342	25.6107	26.6265	25.1986	25.8446	26.6155	26.2227	25.9152	25.873
O09167	Rpl21	ribosomal protein L21	27.7662	27.4999	27.1209	28.3059	26.3178	28.4897	28.6291	27.5798	27.7986	27.9641
Q6P5U7	Nwd2	NACHT and WD repeat domain containing 2	20.475	29.9415	22.5643	29.9415	31.0473	21.4108	22.6527	22.5643	24.4281	23.0368
F8WHP8	None	None	29.372	29.83	29.6492	29.9894	29.311	29.5061	29.9627	29.9501	30.0553	30.289
Q8CH77	Nav1	neuron navigator 1	25.4051	26.9708	27.1842	24.9223	26.8017	21.4108	22.9327	26.6475	27.1452	20.6289
Q99JB2	Stoml2	stomatin (Epb7.2)-like 2	23.9731	22.5406	24.2395	24.918	22.887	25.5033	23.2053	25.1961	24.606	25.4937
A0A5F8MPY2	None	None	24.8308	20.6337	23.2025	22.6976	20.4312	25.5485	23.817	22.861	23.6475	24.2098
Q8BGH4	Reep1	receptor accessory protein 1	26.0147	25.4582	25.7429	25.7291	25.0394	21.4108	25.8107	24.9223	24.8395	24.1933
Q9CYH2	Prxl2a	peroxiredoxin like 2A	27.5978	26.9932	26.7701	27.4554	27.0437	27.6664	27.8184	27.5439	26.9875	27.7237
A0A0A6YX18	Atp6v1h	ATPase, H+ transporting, lysosomal V1 subunit H	31.0415	30.9927	30.9726	30.9443	31.1317	30.9668	31.0203	30.9798	30.7716	30.8334
Q9DBJ1	Pgam1	phosphoglycerate mutase 1	32.2035	32.0884	32.0035	31.9193	32.1519	32.2035	31.3956	31.7807	31.8647	31.8921
Q9ER73	Elp4	elongator acetyltransferase complex subunit 4	24.339	24.9771	25.3306	23.6588	25.18	23.9543	23.1729	22.3279	25.2978	23.6208
O89086	Rbm3	RNA binding motif (RNP1, RRM) protein 3	26.1003	25.9856	24.8022	24.9872	26.4291	25.903	26.814	26.3687	26.4861	25.9518
Q9Z1J3	Nfs1	nitrogen fixation gene 1 (S. cerevisiae)	28.4849	28.8188	28.6229	28.9156	28.5852	28.6291	28.5581	28.3203	28.6499	28.3193
Q8BG18	Necab1	N-terminal EF-hand calcium binding protein 1	23.5008	24.3298	25.9278	25.2289	26.0019	26.8521	25.8203	25.7771	25.0933	26.4582
Q80WJ7	Mtdh	metadherin	27.8526	27.4965	28.1105	27.1024	27.7815	27.2743	26.9839	27.2908	27.7909	26.0597
D3Z158	None	None	25.7936	25.0715	25.1983	26.5627	25.231	26.3295	26.2355	26.1336	25.515	26.4981
P70333	Hnrnph2	heterogeneous nuclear ribonucleoprotein H2	28.2156	27.7624	28.1845	28.1071	27.9112	28.1356	28.5812	28.3632	28.2883	27.985
Q9Z0L0	Tpbg	trophoblast glycoprotein	20.475	20.4312	20.4312	21.8628	20.4312	23.2711	23.0454	20.6289	20.4312	22.0246
Q9Z0V1	Kcnd3	potassium voltage-gated channel, Shal-related family, member 3	24.4264	24.8999	23.5188	25.0295	24.8022	21.4108	23.9067	24.5752	23.8869	23.5752
Q9QXK3	Copg2	coatomer protein complex, subunit gamma 2	25.9439	20.9413	24.0689	24.5867	22.8936	26.0147	25.3298	24.7738	25.1145	24.8638
P55302	Lrpap1	low density lipoprotein receptor-related protein associated protein 1	28.4276	28.2696	28.7258	28.005	28.4913	27.6243	28.4244	27.3972	28.544	27.6185
Q99MN9	Pccb	propionyl Coenzyme A carboxylase, beta polypeptide	28.6167	28.5378	28.4774	28.4849	28.6167	28.7258	28.4375	28.7823	28.8029	28.6291
O70443	Gnaz	guanine nucleotide binding protein, alpha z subunit	30.2548	29.6883	30.3017	30.1233	29.6973	30.289	30.1722	30.2254	30.3456	30.2375
Q8BGU5	Ccny	cyclin Y	27.2695	26.4065	26.7866	26.5723	26.7846	26.3605	26.5068	26.5814	26.2696	26.6744
P39087	None	None	25.3039	25.2095	25.7649	24.4264	25.1264	25.6173	25.7321	25.664	25.0879	26.0821
Q6PGH1	Bud31	BUD31 homolog	25.1697	22.5719	22.8128	23.1729	20.4312	21.4108	21.1471	22.8936	20.4312	20.6289
Q91VC3	Eif4a3	eukaryotic translation initiation factor 4A3	28.2216	28.8073	28.1594	28.6167	28.383	28.1018	28.3906	28.0427	28.3637	27.4206
Q8CBY8	Dctn4	dynactin 4	27.5739	28.1569	27.7662	27.4367	27.7284	27.9099	27.9902	27.9838	28.0714	27.8272
Q9Z2U1	Psma5	proteasome subunit alpha 5	24.6112	25.0775	26.0597	26.4307	24.4595	25.9879	25.7589	26.5282	25.8537	26.1372
P35979	Rpl12	ribosomal protein L12	28.6121	28.1794	28.7568	28.586	27.7746	28.9864	28.754	28.6566	28.7491	28.4849
Q791T5	Mtch1	mitochondrial carrier 1	29.1406	29.0956	29.0694	29.4048	29.1593	29.2111	29.677	29.4176	29.1094	29.4722
Q922Q1	Mtarc2	mitochondrial amidoxime reducing component 2	28.8362	28.6791	28.7954	28.6615	29.1389	28.7349	28.6566	28.5479	28.6593	28.7117
Q6VNB8	Wdfy3	WD repeat and FYVE domain containing 3	27.0641	26.5457	27.0977	27.6515	27.2647	25.5392	27.5184	26.6907	26.57	25.9856
Q8CH18	Ccar1	cell division cycle and apoptosis regulator 1	24.506	20.4312	24.4595	24.1235	21.9928	25.0999	25.261	24.109	25.5547	23.4026
Q9CQF3	Nudt21	nudix hydrolase 21	23.574	20.916	21.973	23.2395	21.5516	23.9244	23.702	22.8411	22.0231	24.8164
Q62167	Ddx3x	DEAD box helicase 3, X-linked	28.5122	28.847	28.7926	28.7424	28.3879	28.1149	28.4948	28.1551	28.8779	28.1406
Q3UFQ8	Carmil3	capping protein regulator and myosin 1 linker 3	20.475	20.4312	23.074	21.9171	21.2031	21.4108	23.3888	21.2114	24.2918	23.7992
Q5IRJ6	Slc30a9	solute carrier family 30 (zinc transporter), member 9	23.7098	21.8873	23.6196	24.4379	24.9665	23.9177	25.349	25.1986	24.7873	24.4418
P0C027	Nudt11	nudix hydrolase 11	25.3742	24.7944	24.5139	25.4959	26.1893	21.4108	25.0506	25.0214	24.3133	24.2049
Q9CQF4	Mtres1	mitochondrial transcription rescue factor 1	25.5324	23.7315	23.4297	23.2632	22.7072	24.68	21.1471	20.4312	23.3621	20.6289
P61211	Arl1	ADP-ribosylation factor-like 1	24.3079	23.1044	24.1033	25.0514	24.0673	24.8164	24.905	24.8073	24.0703	25.1852
P37040	Por	cytochrome p450 oxidoreductase	28.607	28.7926	28.8629	28.5237	28.9725	28.1389	28.2565	28.8124	28.2863	28.8124
P62274	Rps29	ribosomal protein S29	28.8275	28.1125	27.8329	27.821	27.9121	27.8895	27.8241	27.5473	27.8913	27.5899
Q9CZT8	Rab3b	RAB3B, member RAS oncogene family	27.158	26.6064	26.7686	27.7588	26.5611	27.909	27.4432	27.329	26.8097	28.4474
Q543K9	Pnp	purine-nucleoside phosphorylase	26.3453	26.0147	25.4695	26.4269	26.792	25.5324	26.4861	25.2902	24.2408	25.7858
A2ALS7	None	None	24.6507	23.056	24.7491	24.1703	23.9229	23.5507	25.1469	25.8185	24.6468	26.1942
A0A1W2P772	None	None	26.7366	25.0623	26.5013	25.5655	25.6752	27.1481	26.918	26.0491	25.8446	27.2724
G3UZ60	None	None	25.2643	24.1197	24.8696	25.4752	25.2902	25.52	26.2777	25.1401	25.1588	25.6849
Q14CH7	Aars2	alanyl-tRNA synthetase 2, mitochondrial	25.313	25.0059	25.9296	24.9621	24.048	23.1342	23.7282	25.4399	23.791	24.7503
Q9JLB0	Pals2	protein associated with LIN7 2, MAGUK family member	27.8459	27.9287	28.0082	27.9069	27.9997	27.7196	27.6435	27.8867	27.9723	27.8835
S4R199	None	None	20.475	20.4312	20.4312	26.8074	23.8797	27.8961	26.7701	26.3437	20.4312	26.4957
Q8BJH1	Zc2hc1a	zinc finger, C2HC-type containing 1A	29.0065	29.1247	28.9333	28.5479	29.0348	28.4693	28.4897	28.2615	29.282	28.3432
Q3UVL4	Vps51	VPS51 GARP complex subunit	27.0552	27.1952	27.3955	27.1967	26.9069	26.2184	26.6509	27.0472	26.856	27.2733
Q60932	Vdac1	voltage-dependent anion channel 1	33.6602	33.6851	33.8037	33.7576	33.5575	33.6851	33.8978	33.8458	33.6851	33.9265
Q3UV17	Krt76	keratin 76	27.2061	20.4312	20.4312	24.201	26.1424	25.9623	27.2519	23.6091	30.4674	26.5676
Q8R5C5	Actr1b	ARP1 actin-related protein 1B, centractin beta	27.271	27.0285	26.792	27.6	27.0891	27.7719	27.7014	27.8474	26.706	28.1815
P24638	Acp2	acid phosphatase 2, lysosomal	23.7841	23.8308	21.3767	22.1885	21.6817	24.3758	23.2891	24.4481	23.2579	22.792
Q8K010	Oplah	5-oxoprolinase (ATP-hydrolysing)	24.8209	21.4576	23.2961	23.0633	23.5455	21.4108	21.1471	23.5008	22.2602	22.0419
Q78ZM0	Snx3	sorting nexin 3	25.8215	24.4075	24.905	25.8316	23.895	26.2072	25.0295	26.2301	25.1976	26.2457
Q8VEK3	Hnrnpu	heterogeneous nuclear ribonucleoprotein U	30.894	30.9443	30.6575	31.0473	30.6254	30.894	31.0415	31.1929	31.0541	30.8608
Q8R1X6	Spart	spartin	22.8282	24.3079	24.8617	23.1378	24.1559	23.0789	23.163	20.4312	24.2169	22.0278
A0A087WNV1	Agfg1	ArfGAP with FG repeats 1	27.4511	27.7148	27.491	27.0285	27.541	27.3233	28.0918	27.5978	27.9688	27.7624
E9Q3M0	None	None	20.475	22.7696	21.4576	22.081	21.1044	21.4108	24.4138	22.0991	22.5851	22.8202
D3Z061	None	None	26.4703	26.9959	26.7129	26.3453	26.2152	26.0163	25.5816	26.3954	26.7329	25.9526
Q9JMH6	Txnrd1	thioredoxin reductase 1	28.2018	28.0864	27.9055	28.247	27.8241	27.9775	28.2961	28.6167	28.2246	28.2673
G3UYQ2	None	None	20.475	22.7619	23.906	23.3688	24.2531	24.6456	22.7619	25.6514	24.0673	24.6206
E9Q517	None	None	24.507	25.477	25.1814	25.223	25.349	24.7751	21.1471	25.0826	22.8527	25.0769
Q9CR16	Ppid	peptidylprolyl isomerase D (cyclophilin D)	29.3482	29.3329	29.3212	29.2567	29.1809	29.3239	28.9622	28.4244	29.4259	28.6548
Q9CXF4	Tbc1d15	TBC1 domain family, member 15	22.8539	21.3617	22.9501	20.4312	23.6126	21.4108	21.1471	21.973	20.6289	20.6289
Q8BVI4	Qdpr	quinoid dihydropteridine reductase	28.8149	28.7777	28.4474	29.2781	28.6548	28.4634	28.7995	28.5294	28.2961	28.5294
Q9WUM5	Suclg1	succinate-CoA ligase, GDP-forming, alpha subunit	31.0203	31.0084	31.0084	30.8863	30.9502	30.7987	30.9502	30.6093	31.0707	30.7085
Q8BVL3	Snx17	sorting nexin 17	22.975	20.4312	21.6693	22.4826	20.4312	23.822	23.364	21.6817	22.1598	22.5016
P10518	Alad	aminolevulinate, delta-, dehydratase	25.0567	25.1602	24.8467	25.8771	25.6813	24.5886	21.1471	26.1148	23.5507	24.1321
P48678	Lmna	lamin A	28.5769	28.6593	28.0816	28.4128	28.5669	27.8913	28.2843	27.7148	28.7464	26.9008
P05202	Got2	glutamatic-oxaloacetic transaminase 2, mitochondrial	33.5961	33.5961	33.3841	33.6498	33.4689	33.5961	33.7235	33.6498	33.5961	33.5961
Q6NVG1	Lpcat4	lysophosphatidylcholine acyltransferase 4	25.71	25.0947	25.1653	25.8816	24.9945	25.4695	24.109	24.9839	25.1602	24.6214
P57746	Atp6v1d	ATPase, H+ transporting, lysosomal V1 subunit D	30.0769	29.851	29.6369	30.0834	29.6492	30.1949	30.3579	30.073	29.6703	30.3579
P42232	Stat5b	signal transducer and activator of transcription 5B	23.3377	23.9731	21.8873	22.7143	22.8539	21.4108	22.7995	22.239	22.2223	22.5579
Q8BG05	Hnrnpa3	heterogeneous nuclear ribonucleoprotein A3	31.5243	31.7104	31.2226	31.1698	31.5121	31.3546	31.2351	30.4377	31.5121	30.5971
B1AXS8	None	None	20.475	20.4312	22.3352	22.4413	21.9789	21.4108	24.9291	22.2306	21.9326	23.8926
A0A1L1SSC0	None	None	24.0612	26.7476	25.2242	21.7101	24.7575	21.4108	21.1471	24.524	24.028	22.3511
P53810	Pitpna	phosphatidylinositol transfer protein, alpha	30.4628	30.3316	30.1504	29.9839	29.995	29.7959	30.0518	29.9285	30.2761	29.7312
P40336	Vps26a	VPS26 retromer complex component A	27.0628	26.5068	26.3314	27.3324	26.2681	27.5131	27.4898	27.4511	26.2569	27.5439
Q6GQS1	Slc25a23	solute carrier family 25 (mitochondrial carrier; phosphate carrier), member 23	27.6343	28.0357	27.9688	27.7945	27.7463	26.9875	27.909	27.5427	27.9014	27.0459
Q8VEH8	Erlec1	endoplasmic reticulum lectin 1	25.7858	25.873	25.1616	24.9371	25.8537	24.6829	25.6213	25.2006	24.2275	25.2418
Q80UG2	Plxna4	plexin A4	29.2235	29.12	28.9725	29.2235	29.1934	29.3517	29.1934	29.2211	29.372	29.1445
G5E8B6	Kirrel3	kirre like nephrin family adhesion molecule 3	20.475	21.5564	22.3056	23.0396	22.0278	21.4108	24.3671	23.6588	22.0335	23.9762
Q9D3A9	Ttyh1	tweety family member 1	27.3412	27.1679	27.4389	26.8647	27.1122	28.0185	27.2724	27.2485	27.3043	27.5652
P54869	Hmgcs2	3-hydroxy-3-methylglutaryl-Coenzyme A synthase 2	25.7818	25.0538	25.7484	25.6504	26.2624	25.9938	27.2749	26.1448	26.0011	25.8203
P62838	Ube2d2a	ubiquitin-conjugating enzyme E2D 2A	25.3846	22.5606	22.3573	25.8014	24.5886	26.2649	25.546	24.2027	25.5369	25.7964
A0A1W2P832	Ralgapa1	Ral GTPase activating protein, alpha subunit 1	25.848	25.8599	25.4842	25.734	26.3295	25.7695	25.8884	26.5234	26.3365	26.482
Q61335	Bcap31	B cell receptor associated protein 31	26.7499	27.2456	27.5117	26.7495	27.1644	26.4729	27.1836	26.2059	27.1563	25.6001
Q9CQ69	Uqcrq	ubiquinol-cytochrome c reductase, complex III subunit VII	30.3832	30.4753	30.2938	30.0926	30.4674	30.2375	30.0322	29.7411	30.4628	30.0769
Q99KQ4	Nampt	nicotinamide phosphoribosyltransferase	25.5062	26.5952	26.5832	26.7548	25.9861	26.4969	27.3099	27.2598	26.1749	26.8724
P14206	Rpsa	ribosomal protein SA	26.7713	24.8424	26.2203	26.7329	25.0147	27.5587	26.1067	27.0048	26.0491	27.1452
A0A0U1RPL0	Atxn2l	ataxin 2-like	25.3772	26.1018	26.4874	25.7976	25.208	25.8505	26.4729	26.14	26.6771	26.1316
P52800	Efnb2	ephrin B2	23.46	22.8737	25.4752	25.0147	23.5545	24.1996	24.6677	25.9526	25.1523	25.2374
Q80W54	Zmpste24	zinc metallopeptidase, STE24	20.475	20.772	20.4312	24.914	25.0036	24.2491	23.3621	23.8754	24.9789	24.4264
A2BHN6	None	None	20.475	24.5296	20.4312	23.071	22.3133	24.0597	23.3377	24.1496	22.6066	23.6196
P56375	Acyp2	acylphosphatase 2, muscle type	26.3622	26.2588	25.6259	25.8302	26.0666	26.1236	26.0734	25.5183	25.2289	25.1226
P32211	Chrm4	cholinergic receptor, muscarinic 4	25.689	24.3269	25.4734	25.8282	25.3357	26.319	25.9938	25.5978	25.2961	26.1547
Q6P3A8	Bckdhb	branched chain ketoacid dehydrogenase E1, beta polypeptide	25.2418	23.922	24.6972	24.3008	25.1042	24.7873	23.2711	24.5081	22.4086	24.1197
Q68EF6	Begain	brain-enriched guanylate kinase-associated	25.0957	25.5581	25.223	24.4831	26.0923	23.2311	23.807	25.3386	25.8263	23.1299
Q9CQU3	Rer1	retention in endoplasmic reticulum sorting receptor 1	24.2222	24.8467	25.3407	25.363	24.5469	21.4108	25.7498	24.3316	22.5492	23.8137
P84078	Arf1	ADP-ribosylation factor 1	29.8778	30.1834	30.1949	30.6231	29.9934	30.4156	30.6189	30.8413	29.894	31.1122
Q9CQN6	Tmem14c	transmembrane protein 14C	24.4831	23.6945	24.0451	23.8837	23.643	24.9839	24.6265	24.1933	23.6219	24.6302
Q5GH67	Xkr4	X-linked Kx blood group related 4	26.5627	24.3796	25.9576	24.768	26.2696	24.8042	21.1471	25.2095	25.3544	24.0816
A0A0R4J0U7	Commd5	COMM domain containing 5	22.2223	20.4312	21.782	24.732	20.6289	29.1014	23.4834	25.678	20.4312	24.4481
Q923B6	Steap4	STEAP family member 4	20.475	24.7053	24.4766	24.4695	24.1831	21.4108	25.2709	20.4312	20.4312	20.6289
D3Z5R4	Wipf3	WAS/WASL interacting protein family, member 3	26.0293	26.1893	26.2072	26.2807	26.9842	26.5843	26.1782	26.8342	26.9603	26.9973
P63101	Ywhaz	tyrosine 3-monooxygenase/tryptophan 5-monooxygenase activation protein, zeta polypeptide	33.4689	33.3055	33.7235	33.5059	33.6733	33.6295	33.5059	33.8037	34.1429	33.6851
P47758	Srprb	signal recognition particle receptor, B subunit	25.9509	25.7047	25.7951	26.2009	25.5978	24.7627	26.1847	25.2558	25.3039	25.6213
Q9D3D0	Ttpal	tocopherol (alpha) transfer protein-like	25.2393	24.0644	22.7619	22.2666	23.2417	24.0322	24.8788	24.0673	24.3033	24.886
Q62415	Ppp1r13b	protein phosphatase 1, regulatory subunit 13B	25.4582	25.3535	25.3704	25.7263	25.3551	25.011	26.1151	25.7936	25.9599	26.3946
Q8R307	Vps18	VPS18 CORVET/HOPS core subunit	24.475	22.1542	20.4312	24.4396	25.315	24.4322	21.1471	20.4312	20.4312	20.6289
Q8BG51	Rhot1	ras homolog family member T1	28.5997	28.2673	27.9541	28.5769	28.1722	28.93	28.5294	28.4693	28.3734	28.5479
D3YXK2	Safb	scaffold attachment factor B	27.5247	27.3998	27.5319	26.8383	27.3398	26.167	26.8979	27.2733	27.5364	26.393
Q8JZW5	Sh2d5	SH2 domain containing 5	25.6107	25.6126	25.6135	25.8196	25.6426	26.3984	25.4487	26.3622	26.673	25.5062
A6H611	Mipep	mitochondrial intermediate peptidase	23.9459	24.4561	21.394	24.1301	22.9785	21.4108	21.1471	22.8393	24.0269	20.6289
Q8R001	Mapre2	microtubule-associated protein, RP/EB family, member 2	29.1268	29.5601	29.327	29.1934	28.7258	29.4518	29.5937	29.1445	29.677	29.4169
P35293	Rab18	RAB18, member RAS oncogene family	27.4432	26.985	27.5427	27.1701	27.5836	28.2018	27.9925	27.8059	26.8988	27.9014
P17156	Hspa2	heat shock protein 2	26.6974	27.2811	27.5024	27.6731	26.7802	26.9593	28.2578	27.7775	27.4855	27.8241
S4R1Q0	None	None	25.18	24.9706	25.011	24.8547	24.475	24.7944	25.586	25.1429	25.0026	25.583
Q3UEE2	Gss	glutathione synthetase	20.475	20.4312	22.7479	24.075	22.8393	23.788	21.1471	23.9941	24.8082	24.9771
Q64674	Srm	spermidine synthase	26.8956	26.9056	26.6707	27.2175	26.8691	27.2224	27.4367	27.4455	26.6084	27.3007
E9Q4Q2	Sf1	splicing factor 1	26.8428	26.065	25.5841	25.4374	26.2091	25.7705	24.6426	23.0134	26.1847	25.4913
A0A0R4J1B9	Dap3	death associated protein 3	25.5121	25.7578	25.0898	25.5663	25.2342	25.3511	26.1033	25.3317	26.6097	25.9759
Q3UUI3	Them4	thioesterase superfamily member 4	26.7933	27.1802	26.8781	27.3258	25.9296	27.1093	27.4389	27.0352	27.2485	27.3583
Q3UHB1	Nt5dc3	5'-nucleotidase domain containing 3	28.3203	28.7191	28.1509	28.6898	28.1794	28.8055	28.7873	28.5237	28.5812	28.5006
Q8CHK3	Mboat7	membrane bound O-acyltransferase domain containing 7	23.4372	25.1919	25.4632	25.141	24.9794	25.1734	25.8122	25.4913	25.6444	25.1983
A0A0A6YWG7	None	None	28.0778	28.5162	28.3611	28.5185	28.4849	27.6951	27.9838	28.4874	28.3975	28.0315
P21836	Ache	acetylcholinesterase	28.4197	28.5713	28.6499	28.6499	28.7301	29.0917	28.6229	29.0348	28.3906	29.394
Q99LB2	Dhrs4	dehydrogenase/reductase 4	25.1393	26.1221	25.8816	26.4719	25.6354	26.6011	26.1984	26.5315	25.5622	27.4662
Q810B6	Ankfy1	ankyrin repeat and FYVE domain containing 1	25.8154	26.244	26.167	25.8215	25.3226	26.1326	26.3104	26.7329	26.1723	25.8175
Q9DCW4	Etfb	electron transferring flavoprotein, beta polypeptide	30.7688	31.0541	29.6973	29.236	30.819	30.6027	29.3517	29.2032	29.4421	29.4176
A0A087WRF2	Agap1	ArfGAP with GTPase domain, ankyrin repeat and PH domain 1	27.317	26.9127	27.6287	27.0952	26.9769	26.2152	27.0048	27.0891	27.2364	26.4802
Q9CRD2	Emc2	ER membrane protein complex subunit 2	25.8372	26.1448	25.1505	25.9095	25.9759	26.1782	26.2107	25.8678	26.1742	26.0666
Q64010	Crk	v-crk avian sarcoma virus CT10 oncogene homolog	24.7988	23.9429	24.0249	25.2274	25.3829	25.1393	25.2172	25.8521	24.4396	26.17
E9QAI5	None	None	25.2144	24.8774	26.1117	25.1824	25.0826	22.8897	23.3305	25.3511	24.7751	25.4814
A0A494B9Z0	None	None	25.1523	24.7248	24.7963	25.6752	23.9644	25.7578	26.1597	25.0898	24.95	25.2709
B2RXC1	Trappc11	trafficking protein particle complex 11	23.3328	23.807	23.4026	23.5134	22.164	23.4425	21.1471	21.9848	23.6358	20.6289
A0A1L1SQ76	None	None	24.6149	24.048	24.4524	24.6843	23.8642	25.2344	24.9055	24.5469	24.2508	24.606
A6X919	Dpy19l1	dpy-19 like C-mannosyltransferase 1	23.3971	22.9607	23.4209	20.4312	22.8658	21.4108	21.1471	20.4312	23.3233	20.6289
Q8R3T5	None	None	25.9773	25.6233	25.9206	26.0163	25.873	25.2344	24.4407	21.5257	26.3032	25.3021
Q921K2	Parp1	poly (ADP-ribose) polymerase family, member 1	23.0671	20.4312	20.6289	23.2199	20.4312	23.5655	22.7181	20.4312	24.0824	26.3045
Q6P9K8	Caskin1	CASK interacting protein 1	29.6703	30.1445	29.9758	29.7649	29.9313	29.4015	29.7649	29.5485	30.1233	29.2451
Q3UKJ7	Smu1	smu-1 suppressor of mec-8 and unc-52 homolog (C. elegans)	25.7531	25.6015	25.8899	25.5013	26.2807	23.8203	25.9144	25.1943	26.0714	24.3133
Q9QZF2	Gpc1	glypican 1	27.1043	27.6544	28.059	27.4242	28.1569	28.0732	28.1949	28.1018	27.8059	27.9037
O55074	Akap7	A kinase anchor protein 7	20.475	22.2602	20.4312	22.4259	22.7438	24.2719	23.1169	21.5816	22.4333	22.3716
P61759	Vbp1	von Hippel-Lindau binding protein 1	26.6414	27.4585	27.2386	26.6237	27.5787	26.463	27.0235	26.4471	27.211	26.0179
Q9CQV4	Retreg3	reticulophagy regulator family member 3	21.9578	20.475	20.6289	21.9228	21.0086	23.6773	22.792	21.4108	20.4312	23.098
Q8C570	Rae1	ribonucleic acid export 1	26.5843	26.9842	26.3118	26.9644	26.6612	25.9736	26.3178	26.5152	26.9644	25.7665
Q9CRB6	Tppp3	tubulin polymerization-promoting protein family member 3	27.7795	28.6467	28.0237	28.6045	27.738	28.161	28.8029	28.4026	28.6263	28.6167
Q9CZD3	Gars1	glycyl-tRNA synthetase 1	27.821	28.2508	27.8486	27.9902	27.7986	27.2456	26.9973	27.7986	28.2304	27.5817
H3BKQ3	None	None	27.3887	27.4474	27.3629	25.7047	27.5439	26.1942	24.9621	26.2602	27.7148	25.7476
Q8C522	Endod1	endonuclease domain containing 1	26.2624	26.1984	25.6705	26.5445	26.0163	25.3919	25.6462	26.3365	25.3659	26.0392
Q80VC9	Camsap3	calmodulin regulated spectrin-associated protein family, member 3	26.9389	27.7222	28.0444	27.1829	27.7945	26.3723	26.6335	27.1853	27.8778	26.9632
P63318	Prkcg	protein kinase C, gamma	31.488	31.4513	31.337	31.5121	31.1967	31.4337	31.704	31.4118	31.551	31.5121
Q61753	Phgdh	3-phosphoglycerate dehydrogenase	29.0552	29.4611	29.0706	28.9569	29.5347	29.1268	28.9705	29.236	28.3226	28.8372
Q9EPR5	Sorcs2	sortilin-related VPS10 domain containing receptor 2	25.2191	26.3651	26.2152	26.3054	26.5984	26.8208	26.9188	26.8598	26.1517	26.2664
A0A3Q4EG54	None	None	26.9644	30.6804	26.9056	26.9932	30.8608	26.8544	27.3398	26.7114	27.1267	26.8383
A0A0R3P9D0	Plppr3	phospholipid phosphatase related 3	27.8486	27.7823	27.9132	27.1679	28.1071	27.9378	27.1339	27.3752	27.4144	27.2888
F8VPZ3	Usp32	ubiquitin specific peptidase 32	21.6256	23.798	23.0671	23.741	23.6726	24.0869	23.5821	23.6345	24.201	23.822
P35276	Rab3d	RAB3D, member RAS oncogene family	30.252	29.5886	29.5916	30.2511	29.7916	30.7461	30.4332	30.3456	29.5438	30.4055
A0A286YCB8	None	None	25.3523	24.1434	20.4312	24.952	23.2229	21.4108	21.1471	22.0035	24.2689	20.6289
E9PUC5	Psd3	pleckstrin and Sec7 domain containing 3	26.4291	26.5353	26.6404	25.5559	26.4893	27.2663	21.1471	25.6796	20.4312	25.9879
Q80U95	Ube3c	ubiquitin protein ligase E3C	24.6963	25.6752	24.8788	26.2488	25.9931	21.4108	25.3606	25.0145	25.4208	23.781
G5E8U6	Cox18	cytochrome c oxidase assembly protein 18	22.2514	21.7969	22.3211	20.4312	20.6289	21.4108	21.1471	22.9406	23.3838	24.1405
Q3TRG0	Gm1604b	predicted gene 1604b	23.8837	23.2961	22.9568	24.2562	22.9327	24.2369	25.9867	23.123	23.807	24.4901
Q91Y18	Pcdha12	protocadherin alpha 12	26.7627	23.4915	21.6817	22.0574	23.3233	21.4108	22.8897	21.2123	20.9413	22.9472
Q9D1T0	Lingo1	leucine rich repeat and Ig domain containing 1	27.8341	28.0573	28.3172	28.1406	27.7727	28.3142	28.4183	28.3164	27.8026	28.5644
Q8VBZ3	Clptm1	cleft lip and palate associated transmembrane protein 1	27.6209	27.6343	27.5933	25.7377	27.4674	26.4386	26.161	26.7378	27.1668	26.2848
A0A498WFS2	None	None	23.7282	24.6359	23.1757	23.1556	23.0396	24.4806	24.2477	23.4164	24.1105	24.2419
A2AG50	Map7d2	MAP7 domain containing 2	25.3829	25.9736	26.1547	25.9413	26.024	25.6752	26.5814	25.9162	26.7179	26.527
Q9CW03	Smc3	structural maintenance of chromosomes 3	23.9051	23.6345	22.7878	23.6023	20.5734	24.1337	23.1082	22.9644	25.8771	24.95
A0A0A6YY47	Ncam1	neural cell adhesion molecule 1	25.7498	23.9286	24.9083	23.6369	25.2933	24.1968	24.1721	23.5752	20.4312	24.4336
Q99LH2	Ptdss1	phosphatidylserine synthase 1	24.9717	20.5734	23.6773	25.0521	20.772	25.448	24.7536	24.9291	23.7397	24.3008
Q61387	Cox7a2l	cytochrome c oxidase subunit 7A2 like	27.7014	26.886	27.2233	27.8598	24.7779	27.821	27.3481	28.5067	27.8526	27.5739
Q9DB34	Chmp2a	charged multivesicular body protein 2A	27.2608	27.1356	26.7553	26.4367	27.3648	27.0977	26.9603	25.8627	26.6265	26.0327
G3X8X1	None	None	24.8624	23.979	22.5701	25.4632	24.7751	21.4108	24.475	23.5722	23.8626	22.5056
Q8BLF1	Nceh1	neutral cholesterol ester hydrolase 1	27.114	27.4674	27.1043	27.5184	27.2663	27.7612	27.5872	27.2175	27.2647	27.909
G3X8W7	Cdc23	CDC23 cell division cycle 23	22.1273	24.4029	24.9574	24.4138	22.0126	25.0073	23.6673	25.1352	25.1653	24.3758
B9EJ86	Osbpl8	oxysterol binding protein-like 8	27.6515	27.3366	27.7795	28.0185	27.3887	27.2986	28.1248	28.1845	28.0269	28.213
Q9Z2Q6	Septin5	septin 5	26.9875	25.4834	25.7561	25.7444	26.161	25.9686	21.1471	25.6834	20.4312	26.4703
Q9JLV5	Cul3	cullin 3	28.93	29.8332	28.5185	28.7513	28.5581	28.7162	28.2667	28.1963	28.8275	28.4583
P59108	Cpne2	copine II	26.7947	26.2681	26.7114	26.735	26.0904	27.2061	27.6889	27.0498	26.1148	26.856
Q8C0P5	Coro2a	coronin, actin binding protein 2A	25.0623	25.1943	24.0992	25.1632	25.0059	24.9245	24.373	23.9731	24.4407	24.7491
F8VQC1	Srp72	signal recognition particle 72	20.475	21.973	24.3079	23.6462	21.6256	24.7779	24.2562	22.479	24.1405	22.8564
P63323	Rps12	ribosomal protein S12	24.4976	24.517	24.4029	25.6849	23.0084	26.0354	24.8638	24.9055	24.8449	25.251
Q61578	Fdxr	ferredoxin reductase	26.2739	25.9144	26.1003	26.158	25.3291	26.2537	26.453	26.1942	26.0454	26.2414
Q80XQ2	Tbc1d5	TBC1 domain family, member 5	20.475	21.9228	22.7369	23.7616	21.5552	21.4108	21.1471	20.4312	21.965	20.6289
P14685	Psmd3	proteasome (prosome, macropain) 26S subunit, non-ATPase, 3	28.2883	28.0105	28.1406	29.0348	28.3247	28.5122	29.0724	28.2156	28.9915	28.9018
Q8C3Q5	Shisa7	shisa family member 7	27.2386	27.1571	28.0028	27.0437	27.6488	27.142	27.0437	27.1053	27.4367	26.6265
F8VQK6	Fbxl18	F-box and leucine-rich repeat protein 18	22.4182	20.4312	20.4312	20.772	21.6693	21.4108	23.2417	22.4722	20.6289	22.8411
P60202	Plp1	proteolipid protein (myelin) 1	32.695	32.2695	32.2035	32.6835	32.6426	32.695	32.0546	31.8769	32.0035	32.4088
E9Q638	None	None	22.3912	24.4612	24.175	23.0084	22.0991	21.4108	23.185	20.4312	22.8564	22.7355
Q9Z1B3	Plcb1	phospholipase C, beta 1	30.6254	30.3221	30.4674	30.6804	30.2254	30.4726	30.5861	30.5559	30.7603	30.7652
P40630	Tfam	transcription factor A, mitochondrial	27.159	27.6254	26.9841	26.792	27.8913	26.3897	27.0255	26.167	27.7014	26.4714
A0A1L1SQ42	None	None	27.4084	27.5392	26.0163	25.581	27.5283	24.8022	27.9641	25.137	25.7818	24.5279
Q9D0L7	Armc10	armadillo repeat containing 10	27.329	26.2649	26.3365	27.1267	26.0838	27.5515	27.4727	27.271	26.2355	27.3243
Q8R1Y2	Bmerb1	bMERB domain containing 1	24.1061	23.9516	23.5534	22.2472	23.7505	23.9516	21.1471	22.0155	23.2973	22.5701
Q80ZP8	None	None	26.4318	26.463	26.5723	26.3233	25.4305	25.1632	25.9861	26.3508	26.0597	24.2508
P62196	Psmc5	protease (prosome, macropain) 26S subunit, ATPase 5	29.327	28.9989	29.0149	28.8275	29.05	29.1445	29.0604	28.1327	28.8308	28.4026
P63276	Rps17	ribosomal protein S17	27.9641	27.8835	27.6931	28.161	27.2276	28.3213	28.2597	27.6343	28.674	27.9112
Q9CPQ8	Atp5mg	ATP synthase membrane subunit g	29.6585	29.6703	30.073	29.4421	29.4358	29.7162	30.1361	29.7649	29.9627	29.7916
A0A0R4J0B4	Cmas	cytidine monophospho-N-acetylneuraminic acid synthetase	25.972	25.2342	25.2537	26.3909	24.4322	26.3416	26.2184	25.3021	26.1782	26.2883
O55143	Atp2a2	ATPase, Ca++ transporting, cardiac muscle, slow twitch 2	31.6547	31.7807	32.1295	31.8323	31.7807	31.7433	31.6193	31.5121	31.8769	31.6413
Q9CQU5	Zwint	ZW10 interactor	24.2348	25.4163	23.9286	24.7885	23.6147	24.9316	25.2961	24.2651	25.8435	24.8728
P14131	Rps16	ribosomal protein S16	28.9788	28.1995	28.3706	28.3213	28.2107	28.7873	28.7663	28.5669	28.6099	28.546
P23818	Gria1	glutamate receptor, ionotropic, AMPA1 (alpha 1)	23.2311	20.4312	20.4312	22.3279	20.4312	24.1441	23.1454	22.5329	20.4312	23.3328
O70252	Hmox2	heme oxygenase 2	25.5033	25.9576	24.8135	22.0231	25.9056	26.5627	25.6514	25.9002	25.4827	26.6011
Q60902	Eps15l1	epidermal growth factor receptor pathway substrate 15-like 1	24.0173	22.887	24.5669	23.618	25.8122	26.2883	24.6302	24.848	24.6621	24.9915
Q8K0D5	Gfm1	G elongation factor, mitochondrial 1	26.9569	26.5611	26.8676	27.0786	26.6771	26.5901	26.3815	26.5037	27.0326	26.4893
O55131	Septin7	septin 7	25.6162	25.5642	25.0201	23.9494	25.5994	25.1042	24.5469	24.0816	25.0319	23.7703
Q9CQV6	Map1lc3b	microtubule-associated protein 1 light chain 3 beta	26.6155	27.7775	25.6678	28.5122	25.2274	27.6142	27.7674	27.9227	27.1278	28.4874
Q9WUN2	Tbk1	TANK-binding kinase 1	24.028	24.743	24.4791	23.9731	22.8439	21.4108	24.4481	23.6219	23.299	22.5544
Q5F285	Tmem256	transmembrane protein 256	24.8804	24.6991	24.5485	24.8565	24.9223	25.6037	24.7852	24.7751	24.9574	25.0846
A0A338P6P6	Acap2	ArfGAP with coiled-coil, ankyrin repeat and PH domains 2	26.237	26.9728	26.9787	25.9465	26.4861	26.3011	26.1326	25.7846	26.4339	26.177
Q80XR5	U2af2	U2 small nuclear ribonucleoprotein auxiliary factor (U2AF) 2	27.8976	27.3774	27.2608	27.7624	27.1267	27.7578	27.8934	27.6525	27.8486	27.5308
Q91V35	Ptpra	protein tyrosine phosphatase receptor type A	27.5145	27.817	27.4052	27.2061	27.0552	27.7402	28.0499	27.4441	27.5933	27.4938
Q9Z1T1	Ap3b1	adaptor-related protein complex 3, beta 1 subunit	20.475	21.8052	22.8551	23.6665	22.9501	21.4108	23.2921	24.9717	24.8373	23.8513
Q8BGT1	Flrt3	fibronectin leucine rich transmembrane protein 3	23.781	24.0992	24.5796	23.074	24.1148	24.3452	24.255	24.6289	23.859	24.9839
O35286	Dhx15	DEAH-box helicase 15	26.4981	26.2595	25.6796	25.8695	25.0769	26.2602	26.4883	26.7265	26.9118	25.5994
Q3V1L4	Nt5c2	5'-nucleotidase, cytosolic II	26.4582	25.9509	26.1634	26.4291	25.9526	24.5709	25.6988	26.3178	26.0516	25.8372
Q8CGP2	H2bc22	H2B clustered histone 22	33.5575	33.7235	33.8458	33.6851	33.6498	33.5059	33.5575	33.4689	33.8458	33.3371
P62192	Psmc1	protease (prosome, macropain) 26S subunit, ATPase 1	28.3428	28.2883	28.1995	28.4224	27.957	27.9424	28.0294	28.1722	28.3312	27.7499
Q62159	Rhoc	ras homolog family member C	20.475	22.6921	20.4312	22.0198	22.1149	23.9051	22.9785	21.5564	21.5536	22.7181
A2AGN7	None	None	26.0574	26.0806	26.4788	25.571	26.706	27.1122	26.4582	26.4582	26.0002	27.1024
P62874	Gnb1	guanine nucleotide binding protein (G protein), beta 1	33.5059	33.5575	33.6851	33.1698	33.5961	33.3841	33.1247	33.3371	33.4689	33.3841
Q5SUH7	Clint1	clathrin interactor 1	27.5614	27.3955	27.6278	27.1194	27.8778	27.4023	27.4206	26.735	27.4084	27.211
Q80ZF8	Adgrb3	adhesion G protein-coupled receptor B3	26.2762	26.3646	26.5494	26.5152	26.3763	25.7797	26.3045	26.1236	26.6667	25.0394
Q8VDQ1	Ptgr2	prostaglandin reductase 2	26.298	25.5485	25.6444	26.0714	26.0863	25.9247	25.0879	25.8966	24.1933	25.757
Q8BHH2	Rab9b	RAB9B, member RAS oncogene family	23.086	23.9346	20.4312	21.7411	21.324	23.9286	23.2874	21.7411	23.9494	23.364
P70195	Psmb7	proteasome (prosome, macropain) subunit, beta type 7	28.3524	28.0294	27.9786	28.1051	28.375	28.1275	28.2508	27.2233	27.9321	27.785
E9Q3L2	Pi4ka	phosphatidylinositol 4-kinase alpha	29.2712	29.4387	29.3458	29.8034	29.4946	29.0972	29.2287	29.3065	29.5726	29.2111
Q9Z0H8	Clip2	CAP-GLY domain containing linker protein 2	28.8211	29.6662	29.1934	28.5696	29.2032	28.5758	28.4197	28.4849	29.4946	28.2615
P70236	Map2k6	mitogen-activated protein kinase kinase 6	25.4695	26.3984	26.0044	25.2128	25.4051	24.9813	24.918	25.7818	25.4582	25.2643
E9QAQ5	Gsk3b	glycogen synthase kinase 3 beta	29.5293	29.7478	29.6137	29.7007	29.4449	29.3661	29.5266	29.4556	29.7086	29.1268
Q3TES0	Iqsec3	IQ motif and Sec7 domain 3	25.8122	26.3548	25.6881	25.71	27.0674	23.9898	26.2152	25.2289	26.1221	25.3772
Q3UIU2	Ndufb6	NADH:ubiquinone oxidoreductase subunit B6	28.3067	28.3079	28.1275	28.4327	28.1867	27.8778	28.9455	28.4448	28.8681	28.7926
A6X8Z5	Arhgap31	Rho GTPase activating protein 31	20.475	22.2868	22.8489	23.3233	22.658	21.4108	24.0992	23.2053	25.5908	23.7098
Q9WVQ1	Magi2	membrane associated guanylate kinase, WW and PDZ domain containing 2	25.4589	25.7936	26.3045	25.5127	25.8618	25.4035	26.8618	26.8201	26.3695	25.9072
P62806	H4c8	H4 clustered histone 8	34.3402	34.2952	34.3402	34.1429	34.4008	34.0032	34.2952	34.0032	34.455	33.6295
Q8CCJ4	Amer2	APC membrane recruitment 2	26.4861	26.4866	26.8661	24.8022	25.9908	25.1961	25.1453	25.0449	26.792	24.3221
Q9EP89	Lactb	lactamase, beta	25.6944	27.1668	27.2571	26.3499	26.9787	27.5439	27.2127	26.453	27.8674	27.2411
D3Z6I8	Tpm3	tropomyosin 3, gamma	23.5805	24.0816	24.1603	20.4312	24.5314	25.5622	23.9854	24.1197	23.817	25.8718
Q91WC0	Setd3	SET domain containing 3	22.2666	20.475	21.5199	21.2142	20.475	21.4108	24.6857	23.054	20.6289	22.1029
E9PZM8	None	None	22.1029	24.511	22.094	22.12	23.6588	24.6991	24.095	24.1877	22.4899	23.7727
F8WI35	None	None	32.7928	32.8492	32.9598	32.5477	33.0125	32.7058	32.7058	32.3135	32.9856	32.1791
Q9QXV0	Pcsk1n	proprotein convertase subtilisin/kexin type 1 inhibitor	24.0967	24.4901	22.2223	24.4791	22.9546	21.4108	21.1471	22.658	24.2677	23.185
Q07409	Cntn3	contactin 3	22.5462	23.8092	24.0816	23.395	23.364	24.3685	25.5788	24.3702	22.4444	24.8492
Q921T2	Tor1aip1	torsin A interacting protein 1	20.475	20.4312	21.7969	20.4312	22.9568	24.5772	23.9429	20.6289	24.0057	20.6289
A0A286YDL2	None	None	23.8453	24.1148	24.6485	23.817	23.4041	23.6369	24.7873	24.743	24.0631	25.7672
P63017	Hspa8	heat shock protein 8	34.5189	34.6368	34.5189	34.6368	34.5189	34.5728	34.7685	34.5728	34.7685	34.5728
Q8BHN0	Ppm1l	protein phosphatase 1 (formerly 2C)-like	22.0198	20.475	20.4312	22.0035	20.4312	21.4108	23.7243	22.3352	20.6289	22.1372
O55234	Psmb5	proteasome (prosome, macropain) subunit, beta type 5	29.6137	29.1593	29.1406	28.9945	29.677	29.0754	29.4015	28.7066	29.0258	29.04
Q8BGK5	Slc35f1	solute carrier family 35, member F1	22.0126	20.475	21.2929	20.9953	20.475	23.054	22.5462	20.9273	20.6289	22.2847
P63300	Selenow	selenoprotein W	24.756	25.2172	25.0005	24.4307	24.4468	21.4108	21.1471	24.5093	25.1393	24.8774
A2AQ43	Fnbp1	formin binding protein 1	25.0185	27.5024	27.0674	25.1844	26.0114	24.6772	25.678	25.5674	25.7589	25.0345
O08739	Ampd3	adenosine monophosphate deaminase 3	26.2807	26.0886	25.5908	26.463	25.3426	25.2109	25.6881	25.7661	25.9526	25.1535
Q9CZW4	Acsl3	acyl-CoA synthetase long-chain family member 3	27.2789	27.479	27.2014	27.4405	27.3856	26.8832	27.4144	27.2456	27.3936	26.7265
Q922V4	Plrg1	pleiotropic regulator 1	24.0733	22.9785	23.7268	24.2544	23.7268	24.6214	23.651	25.4208	24.6829	23.5234
A0A8V5L0Q6	Ksr2	kinase suppressor of ras 2	22.8564	23.9188	22.1372	23.843	24.2677	23.123	21.1471	23.3888	23.3448	20.6289
Q8BTI8	Srrm2	serine/arginine repetitive matrix 2	25.0368	26.8399	26.5282	25.5674	26.1003	21.4108	25.223	25.141	27.5775	20.6289
Q91W69	Epn3	epsin 3	24.5456	24.9899	24.8492	23.9051	23.2488	25.6188	24.4307	24.5965	24.511	25.5121
P61164	Actr1a	ARP1 actin-related protein 1A, centractin alpha	30.0553	30.0769	30.1569	29.995	29.9627	30.1698	30.3513	30.0926	29.9285	30.4156
D3YUS5	None	None	24.2369	25.223	25.0826	23.7334	24.9083	23.2921	23.9505	22.7995	25.5663	23.4041
Q9CQB4	Uqcrb	ubiquinol-cytochrome c reductase binding protein	27.4528	27.663	28.0987	27.7909	27.7679	28.7398	27.3324	28.3611	28.0444	28.2086
E9PUD2	Dnm1l	dynamin 1-like	30.8785	31.1029	30.7288	31.1929	30.631	30.9341	31.2022	31.086	31.1069	31.0707
Q9JIW9	Ralb	v-ral simian leukemia viral oncogene B	26.0454	25.7672	25.6146	25.1976	25.6444	23.5008	25.6198	25.2978	25.1469	25.5841
P50518	Atp6v1e1	ATPase, H+ transporting, lysosomal V1 subunit E1	31.498	31.551	31.6333	31.4118	31.3709	31.5599	31.8137	31.4707	31.7682	31.4934
C7IVS7	Cacnb2	calcium channel, voltage-dependent, beta 2 subunit	24.8565	24.1015	24.5965	23.1277	23.8308	23.8403	24.0134	23.4894	23.6208	22.7602
P52479	Usp10	ubiquitin specific peptidase 10	23.0454	24.1268	23.798	24.2508	20.6289	23.1378	25.0532	24.9462	23.7243	24.748
Q3UE92	Xpnpep1	X-prolyl aminopeptidase (aminopeptidase P) 1, soluble	28.0611	28.1537	28.0159	28.6579	28.0918	28.0427	28.9095	29.0113	28.059	28.7634
Q9EST5	Anp32b	acidic nuclear phosphoprotein 32 family member B	22.3588	21.2252	21.5558	20.4312	23.5534	24.9899	21.1471	22.2186	22.6257	25.8909
A0A5F8MPB5	None	None	22.8439	25.6678	25.0047	26.3135	24.0322	23.3621	23.7062	24.4281	23.2905	24.1985
Q7M739	None	None	25.6288	25.7893	26.4913	26.1203	26.158	23.4209	25.5655	26.0019	26.6384	22.2602
I7HLV2	None	None	28.1484	27.6598	28.1149	27.2509	27.9688	27.117	27.3029	27.4038	28.2521	26.9842
Q4ACU6	Shank3	SH3 and multiple ankyrin repeat domains 3	29.1638	29.4169	29.6532	29.4737	29.3765	29.2235	29.6989	29.7604	29.6922	29.6429
Q8C7H1	Mmaa	methylmalonic aciduria (cobalamin deficiency) type A	24.8728	25.3919	25.0846	24.68	22.8489	25.4913	25.2142	25.0145	25.546	25.0514
O08547	Sec22b	SEC22 homolog B, vesicle trafficking protein	28.3659	28.9256	28.674	27.8934	28.586	27.935	28.532	27.8891	28.2719	28.247
Q8CFA2	Amt	aminomethyltransferase	20.475	25.0214	22.2808	26.0293	21.3018	24.3155	24.8617	23.7397	25.0898	25.3919
A2AST1	None	None	29.2287	27.9124	27.8106	28.2805	27.8891	27.5263	27.0382	27.6897	27.7662	20.6289
Q60759	Gcdh	glutaryl-Coenzyme A dehydrogenase	26.7114	26.714	26.0179	26.7701	26.5005	26.3233	26.5471	26.2152	26.1003	26.356
Q9D6Y7	Msra	methionine sulfoxide reductase A	22.8128	22.7479	23.6219	21.6256	24.2419	21.4108	21.1471	23.775	21.2896	22.4826
Q3ULD5	Mccc2	methylcrotonoyl-Coenzyme A carboxylase 2 (beta)	27.664	27.5739	27.1115	27.6906	27.6355	27.8474	27.9884	27.6731	27.4808	27.7061
Q69ZU6	Thsd7a	thrombospondin, type I, domain containing 7A	26.8781	26.6907	27.3998	26.4065	27.2048	26.1984	26.2414	26.9312	27.1076	26.0217
Q91YP0	L2hgdh	L-2-hydroxyglutarate dehydrogenase	26.5553	25.9323	25.5509	26.2203	26.4159	25.4445	26.128	26.1597	25.7634	25.3687
Q8R127	Sccpdh	saccharopine dehydrogenase (putative)	28.7634	28.8137	28.9915	28.2346	28.7995	28.2304	28.5644	28.6188	28.7568	28.1509
Q91WK2	Eif3h	eukaryotic translation initiation factor 3, subunit H	26.228	25.8014	27.1767	27.1609	27.1701	27.1668	27.0063	27.1339	26.9769	27.5228
O35841	Api5	apoptosis inhibitor 5	23.1124	24.0173	24.1985	24.9595	21.503	24.1775	24.3053	24.4524	27.7875	23.9543
Q8VBT9	Aspscr1	ASPSCR1 tether for SLC2A4, UBX domain containing	25.7754	25.9668	25.7695	24.748	25.8627	25.5127	26.377	25.7976	26.239	26.2301
Q8C3F2	Fam120c	family with sequence similarity 120, member C	24.2049	24.4595	24.7594	24.7852	24.9863	23.775	26.0141	25.4141	25.363	25.6504
Q8VCW8	Acsf2	acyl-CoA synthetase family member 2	28.2346	28.4774	28.3213	28.2863	28.249	28.0987	27.9756	28.3487	28.1914	28.3373
Q07646	Mest	mesoderm specific transcript	23.8092	23.9762	24.1365	23.2891	24.201	25.175	24.315	23.6686	24.9462	23.817
Q3UEB3	Puf60	poly-U binding splicing factor 60	20.475	20.4312	22.1453	21.1695	23.577	23.9386	21.1471	22.9584	22.4209	22.8349
Q61466	Smarcd1	SWI/SNF related, matrix associated, actin dependent regulator of chromatin, subfamily d, member 1	23.8754	20.4312	20.4312	20.4312	23.1044	24.0393	21.1471	22.3912	23.8308	23.8187
Q64133	Maoa	monoamine oxidase A	29.0149	28.9825	28.9788	29.2528	28.546	29.1797	29.2032	29.1613	28.9553	29.1809
Q9CS84	Nrxn1	neurexin I	29.867	29.8958	30.0071	29.3458	30.0553	29.6635	29.6532	29.5937	29.7916	29.4518
Q8BHZ0	Cyria	CYFIP related Rac1 interactor A	26.1151	24.8706	25.23	26.8017	26.4779	26.1203	26.8705	26.8661	25.7649	27.2247
A0A0R4J1Z3	Tmem33	transmembrane protein 33	26.463	25.8884	24.9447	25.4913	25.0525	26.4893	25.7872	26.527	25.2393	26.6659
Q3UN02	Lclat1	lysocardiolipin acyltransferase 1	23.8818	23.4247	22.5878	24.8606	22.8411	21.4108	23.9898	20.4312	23.6945	22.3011
A0A0R4IZY0	Thop1	thimet oligopeptidase 1	27.491	27.3412	27.0093	27.3583	27.2133	27.8026	27.6943	27.7945	26.8045	27.9247
Q14CH0	Fam171b	family with sequence similarity 171, member B	24.556	25.4589	25.2006	23.2579	25.4718	25.097	25.6918	25.4658	25.4975	25.3407
P63168	Dynll1	dynein light chain LC8-type 1	28.7349	28.0451	28.7373	28.2667	28.6045	27.4554	27.1043	28.5852	28.5143	28.3059
A0A1Y7VK92	None	None	20.475	23.086	21.8628	21.8873	22.5223	24.9425	23.5234	22.5261	25.0147	20.6289
A0A3B2WBH9	None	None	26.2414	25.4651	25.5622	25.0742	25.734	23.8869	25.7484	25.0715	25.5581	25.0584
P47746	Cnr1	cannabinoid receptor 1	25.6854	24.9665	25.8233	25.8203	26.1508	23.7467	24.6485	26.0923	24.6426	25.8435
Q3UH60	Dip2b	disco interacting protein 2 homolog B	25.2095	27.5515	26.1647	26.9426	26.6718	24.4818	26.2133	24.6456	27.2162	25.2475
P02802	Mt1	metallothionein 1	26.3954	26.7329	25.7893	25.6221	25.8678	21.4108	26.2636	24.8164	26.3178	24.905
B9EHT4	Clip3	CAP-GLY domain containing linker protein 3	23.9177	23.734	24.3365	24.859	24.4503	24.2419	21.1471	23.8614	24.2112	23.3792
D3YX27	None	None	24.1197	22.2847	22.8056	23.5833	24.6133	21.4108	21.1471	24.0173	21.5199	23.787
Q8CGB9	Ide	insulin degrading enzyme	26.8979	26.5445	26.6074	26.1688	26.4416	26.985	26.2381	27.2888	26.5814	27.3117
A0A0R4J0K2	Ckap5	cytoskeleton associated protein 5	28.9622	28.8384	28.7737	29.5014	28.8073	28.4609	28.4791	28.8233	29.1838	28.5237
O54734	Ddost	dolichyl-di-phosphooligosaccharide-protein glycotransferase	27.4023	26.8979	27.7284	27.1531	27.1555	28.0499	27.5439	27.909	26.9082	27.6957
P22933	Gabrd	gamma-aminobutyric acid (GABA) A receptor, subunit delta	22.3765	21.2142	23.2311	21.9848	20.921	23.2649	23.0671	21.5278	22.7529	22.8585
A0A0A6YWR8	Map4k4	mitogen-activated protein kinase kinase kinase kinase 4	26.2091	25.3565	25.0141	26.3873	24.5825	21.4108	26.7627	24.6526	24.4901	23.395
Q80VP9	Asphd2	aspartate beta-hydroxylase domain containing 2	25.0947	25.3249	24.8774	25.4875	24.7852	23.5567	23.859	25.3445	25.0567	24.9863
Q8BU31	Rap2c	RAP2C, member of RAS oncogene family	20.475	22.0198	20.6289	22.4583	20.4312	21.4108	22.5329	22.164	21.1925	22.4086
Q99K28	Arfgap2	ADP-ribosylation factor GTPase activating protein 2	25.5642	25.6076	25.4975	25.0005	25.3317	25.1672	21.1471	25.401	25.4399	23.8465
Q91V09	Wdr13	WD repeat domain 13	27.6931	27.8241	27.9641	28.1125	27.851	27.832	28.1815	28.2246	28.169	27.8496
Q923T9	Camk2g	calcium/calmodulin-dependent protein kinase II gamma	27.7237	28.1509	28.2761	28.0499	28.1509	27.3955	28.2739	27.9366	27.8462	27.6254
P61028	Rab8b	RAB8B, member RAS oncogene family	25.571	24.9684	25.755	25.5109	24.7292	26.1517	26.0491	25.231	25.3978	25.6294
Q7TPV4	Mybbp1a	MYB binding protein (P160) 1a	24.4237	25.7716	25.71	25.401	25.7067	21.4108	25.7137	23.906	25.6098	24.4138
P08553	Nefm	neurofilament, medium polypeptide	31.3841	31.0052	31.1814	31.1607	31.6333	31.3956	31.0311	31.0473	30.8053	31.0415
P09602	Hmgn2	high mobility group nucleosomal binding domain 2	20.475	20.4312	22.12	24.5093	20.4312	21.4108	24.2572	25.0047	21.5643	23.5188
Q6PDM2	Srsf1	serine and arginine-rich splicing factor 1	28.4874	28.7711	28.5769	28.7276	28.4448	27.4727	28.4774	28.7711	28.5831	27.8913
Q8R2U0	Seh1l	SEH1-like (S. cerevisiae	25.7723	25.5127	25.8342	25.6392	25.7695	25.6213	25.8185	25.1176	25.7047	24.859
Q6NZR5	Skic2	SKI2 subunit of superkiller complex	22.4868	20.4312	21.1797	21.1471	25.1176	21.4108	21.1471	20.4312	20.5734	20.6289
Q3UHD6	Snx27	sorting nexin family member 27	27.7284	27.4183	27.8459	28.3524	27.8272	27.9402	27.935	27.8631	28.5346	28.3637
P05480	Src	Rous sarcoma oncogene	28.0198	28.2264	28.0198	28.4352	28.1932	28.0864	28.4085	28.2657	28.3632	28.8959
P35283	Rab12	RAB12, member RAS oncogene family	27.2201	27.1289	27.5364	26.7224	27.3583	27.4965	27.4441	27.5117	27.1129	27.541
Q8K2Y7	Mrpl47	mitochondrial ribosomal protein L47	25.8546	26.2883	26.0269	25.0235	25.0488	25.4374	25.2978	24.7779	25.7893	23.5534
Q8CJ19	Mical3	microtubule associated monooxygenase, calponin and LIM domain containing 3	28.1199	28.2018	28.1794	27.0674	28.005	27.7719	27.1668	27.1609	28.2673	26.6907
Q60673	None	None	26.1984	26.6084	25.6854	27.0382	26.7279	26.453	26.2664	25.8004	25.9247	25.8994
Q9JMC3	Dnaja4	DnaJ heat shock protein family (Hsp40) member A4	25.109	25.034	23.8048	25.6221	25.433	24.0689	25.1042	24.4489	24.8184	22.1453
Q9D898	Arpc5l	actin related protein 2/3 complex, subunit 5-like	25.2865	25.2374	24.7729	26.0618	25.9175	26.8951	25.5581	25.9773	25.0698	26.918
P63087	Ppp1cc	protein phosphatase 1 catalytic subunit gamma	27.8184	27.1853	27.2724	27.9247	26.7822	27.8835	27.8221	27.5308	27.3867	28.1963
F7ARZ1	None	None	23.6248	24.0102	23.6739	24.8184	24.6265	24.0673	24.2275	24.8706	24.9328	24.8617
Q6P9S0	Mtss2	MTSS I-BAR domain containing 2	25.6796	25.3357	25.6462	24.9945	25.8196	25.5994	23.8818	25.2865	25.6918	23.895
A0A0R4IZX2	Nherf2	NHERF family PDZ scaffold protein 2	24.952	25.7207	25.586	24.3079	24.7804	21.4108	21.1471	25.0343	25.9413	24.5093
Q60803	Traf3	TNF receptor-associated factor 3	26.8399	27.8341	27.0641	27.2789	27.7543	25.9931	27.5308	26.6358	27.6468	24.0644
P11881	Itpr1	inositol 1,4,5-trisphosphate receptor 1	29.1527	28.7111	29.1784	29.197	28.8716	29.1183	28.9553	29.4896	29.1111	29.492
Q9JKN6	Nova1	NOVA alternative splicing regulator 1	25.6114	26.1117	25.9413	24.3133	25.9095	21.4108	25.4814	25.4937	25.4651	23.826
P26645	Marcks	myristoylated alanine rich protein kinase C substrate	29.4737	29.8432	29.8593	29.0464	30.0969	29.3065	28.5713	29.0464	30.0969	29.0641
Q80SW1	Ahcyl1	S-adenosylhomocysteine hydrolase-like 1	30.9927	30.7987	30.7603	31.2717	30.8701	30.4628	30.955	30.7603	30.8544	30.7716
Q91VR7	Map1lc3a	microtubule-associated protein 1 light chain 3 alpha	27.2871	27.357	27.2291	28.2843	26.7627	27.4662	28.1275	27.6852	27.6931	27.9069
Q9CZX0	Elp3	elongator acetyltransferase complex subunit 3	24.936	24.5485	23.4113	25.9509	24.9509	25.5889	24.4818	26.0147	25.8816	25.3606
Q9CQE3	Mrps17	mitochondrial ribosomal protein S17	25.097	25.0999	24.9733	25.3742	23.9188	25.3317	25.689	24.8135	25.3742	25.3306
P62889	Rpl30	ribosomal protein L30	28.2246	26.7713	28.3193	28.5852	27.6618	28.8959	28.3487	28.7127	27.9037	28.3269
Q8BKC5	Ipo5	importin 5	22.5719	24.9733	24.4612	23.8187	21.2123	26.0217	25.1857	23.922	23.7535	23.979
Q03265	Atp5f1a	ATP synthase F1 subunit alpha	34.6368	34.9625	34.8398	34.8398	34.455	34.8398	35.0774	34.7685	34.9625	34.8398
Q8JZW4	Cpne5	copine V	29.1313	29.1071	29.5537	29.5161	29.1406	29.2528	29.6703	29.394	29.3441	30.0505
P17426	Ap2a1	adaptor-related protein complex 2, alpha 1 subunit	32.3749	32.5625	32.5477	32.6689	32.5849	32.2695	32.4501	32.2738	32.5322	32.6128
Q9D924	Isca1	iron-sulfur cluster assembly 1	26.4913	25.8215	26.0806	25.7964	25.7914	26.14	26.1723	26.1098	26.1236	26.673
Q3U422	Ndufv3	NADH:ubiquinone oxidoreductase core subunit V3	25.6834	26.3753	25.2865	26.177	22.5544	26.6155	26.3946	26.1265	26.3695	25.6614
P35980	Rpl18	ribosomal protein L18	28.4819	27.8462	28.3637	29.0191	27.6515	28.532	28.8372	28.4913	28.6291	28.6615
Q9D4H8	Cul2	cullin 2	27.2908	27.7367	27.3972	28.1455	27.114	27.5553	28.0315	27.9641	27.664	27.9366
Q9JK48	Sh3glb1	SH3-domain GRB2-like B1 (endophilin)	27.198	27.4425	27.6161	27.4206	27.6872	27.8631	27.5687	27.5184	27.6142	27.5532
Q8R2R9	Ap3m2	adaptor-related protein complex 3, mu 2 subunit	27.6703	27.9143	27.4183	28.4085	27.4999	28.3789	28.3247	28.7873	27.1481	28.75
E9Q5N7	Nrxn2	neurexin II	27.785	27.935	28.383	27.3798	28.3142	27.9037	27.4023	27.6816	27.8496	27.4691
P59325	Eif5	eukaryotic translation initiation factor 5	26.7511	27.1501	27.0522	27.2663	26.7789	26.2227	26.71	26.6737	27.3648	26.4969
P70451	Fer	FER tyrosine kinase	20.475	23.3448	21.209	21.1797	22.4156	21.4108	21.1471	21.1362	20.4312	20.6289
P34884	Mif	macrophage migration inhibitory factor (glycosylation-inhibiting factor)	28.0816	27.2386	26.7593	27.1339	27.317	27.6209	27.1853	25.5439	27.1701	24.4368
Q80YE7	Dapk1	death associated protein kinase 1	21.9928	23.9051	24.2049	23.3305	23.5317	24.6843	23.2488	23.593	24.0322	24.9684
P27773	Pdia3	protein disulfide isomerase associated 3	31.4766	31.5754	31.3956	31.4513	31.2584	31.1069	31.1814	31.2932	31.6861	30.7967
P12657	Chrm1	cholinergic receptor, muscarinic 1, CNS	26.3499	25.7387	25.9751	26.453	26.0714	26.6679	27.1024	26.0828	25.8302	26.8208
A0A0R4IZX5	Ncan	neurocan	29.4556	29.1465	29.5266	28.9584	28.847	29.5347	29.1071	29.677	29.2111	29.6801
P47740	Aldh3a2	aldehyde dehydrogenase family 3, subfamily A2	26.5407	26.774	27.2695	27.1382	26.6237	27.1076	27.4938	26.663	27.0522	27.5978
D3Z456	None	None	25.7665	23.123	24.9979	24.6468	24.1916	25.5908	25.5642	24.8413	24.9055	25.1453
Q6ZQ18	Efr3b	EFR3 homolog B	26.6612	26.1273	27.0115	27.2922	27.491	27.1967	27.541	27.7795	26.5353	28.0963
Q9D6S7	Mrrf	mitochondrial ribosome recycling factor	26.7593	26.8581	26.2602	26.6064	26.237	27.1278	27.2291	26.3873	26.6566	26.7444
Q6ZWN5	Rps9	ribosomal protein S9	29.3617	28.8275	29.2428	29.0507	28.5185	29.3212	29.2428	29.162	29.3686	29.0494
Q80X80	C2cd2l	C2 calcium-dependent domain containing 2-like	29.5061	29.6863	29.995	29.4748	29.64	29.0191	29.3765	29.4737	29.851	29.4358
D3YWQ0	Dgki	diacylglycerol kinase, iota	26.2848	26.8342	26.63	26.5933	26.5457	26.5092	26.6643	26.9266	26.6883	26.9812
Q9JIA1	Lgi1	leucine-rich repeat LGI family, member 1	30.2644	30.2532	30.1657	29.5266	30.2223	30.2938	29.6883	29.4611	29.9318	29.6248
Q6PB44	Ptpn23	protein tyrosine phosphatase, non-receptor type 23	25.9175	26.1488	26.1782	25.7429	26.0547	26.1148	26.4845	26.1488	25.8196	26.7366
Q6ZWR6	Syne1	spectrin repeat containing, nuclear envelope 1	25.9491	28.5294	26.6265	25.5439	26.8739	25.5357	25.8302	26.4339	26.3605	25.448
P21460	Cst3	cystatin C	26.9932	26.7516	26.7822	26.9101	26.4318	26.8668	25.4285	26.774	26.8676	25.0879
Q7TMY8	Huwe1	HECT, UBA and WWE domain containing 1	27.8255	27.832	28.249	28.1722	27.7974	27.3007	27.357	28.0444	27.9838	27.8735
A0A0A6YX25	None	None	27.9124	28.5769	23.7062	24.8344	22.5462	24.6963	24.1956	23.8268	23.476	22.7479
Q9Z1R4	D17H6S53E	DNA segment, Chr 17, human D6S53E	24.7575	20.4312	23.4468	22.7619	23.407	21.4108	21.1471	22.3765	20.4312	23.2973
A0A1D5RLE0	Dock9	dedicator of cytokinesis 9	24.3452	25.363	25.6487	25.0898	25.0999	25.2142	24.581	26.3125	26.2649	26.0044
A0A0G2JGY9	None	None	29.4286	29.755	30.0128	29.2585	29.8366	29.4157	29.5625	29.5726	29.3661	29.3441
D3YYS9	None	None	23.6196	20.6289	23.5655	20.4312	22.3912	21.4108	24.0644	24.6918	23.1022	23.618
P38647	Hspa9	heat shock protein 9	31.5754	31.7682	31.8137	31.5036	31.8323	31.7286	31.5599	31.498	31.4337	31.6673
Q9DCM0	Ethe1	ethylmalonic encephalopathy 1	22.2373	20.4312	24.2027	22.5056	24.0597	23.6629	21.1471	21.2064	20.4312	20.6289
E9Q1T1	Camk2d	calcium/calmodulin-dependent protein kinase II, delta	29.8202	30.1657	29.6744	29.4896	29.6272	28.8188	29.867	29.0604	30.103	28.8832
A2AN08	Ubr4	ubiquitin protein ligase E3 component n-recognin 4	28.4897	28.375	28.4403	28.1356	28.0732	27.6987	27.7875	28.3226	28.2667	28.3069
E9Q4P1	Wdfy1	WD repeat and FYVE domain containing 1	26.6097	26.0134	27.821	27.9253	27.6561	26.7534	26.109	25.7872	20.4312	27.6264
Q68FE2	Atg9a	autophagy related 9A	22.0574	24.2797	24.2797	24.3593	22.382	23.4938	25.0235	25.2263	23.4894	24.5897
P28663	Napb	N-ethylmaleimide sensitive fusion protein attachment protein beta	29.5964	29.1613	29.1613	29.4556	29.546	29.2032	29.2528	29.4629	29.0754	29.1094
F6SLR4	None	None	25.315	24.9621	25.2709	25.4305	25.6213	25.5075	23.5188	24.5841	24.8413	25.477
B0V2N8	None	None	23.2099	22.0335	21.9578	24.6075	20.4312	21.4108	21.1471	20.4312	21.8526	22.0881
P32921	Wars1	tryptophanyl-tRNA synthetase1	28.2645	28.8137	28.4514	28.8384	28.3269	28.3706	28.8959	28.8528	28.8832	28.7908
E9Q1K0	None	None	20.475	20.4993	23.5599	21.4277	20.6289	21.4108	23.2395	22.6257	21.9703	22.0198
A2AWI7	Sh3glb2	SH3-domain GRB2-like endophilin B2	29.633	29.2742	29.3517	29.5061	29.6532	29.0464	29.0496	29.5201	29.0917	29.6532
Q60931	Vdac3	voltage-dependent anion channel 3	31.8921	32.1791	31.704	32.1669	31.5036	32.1105	32.3551	32.1791	31.7433	32.2292
Q8CIB6	Tmem230	transmembrane protein 230	23.7334	22.52	23.5081	23.0182	22.7878	23.4297	21.1471	20.4312	23.0234	23.056
Q640R3	Hepacam	hepatocyte cell adhesion molecule	27.6468	27.9014	27.5899	28.2961	27.3998	28.1637	28.3789	28.0539	27.5067	28.2426
E9PUL6	None	None	24.9015	24.271	24.1703	25.5788	24.9509	24.7729	25.3846	25.3919	24.886	25.52
Q9CQA3	Sdhb	succinate dehydrogenase complex, subunit B, iron sulfur (Ip)	30.9341	31.4934	31.1967	31.4065	31.3289	30.9502	31.0707	30.8785	31.4159	31.1029
Q6ZWX6	Eif2s1	eukaryotic translation initiation factor 2, subunit 1 alpha	27.4884	27.2621	27.2756	27.4691	26.7939	26.7114	26.4742	26.6771	27.0115	27.6889
Q921W0	Chmp1a	charged multivesicular body protein 1A	25.8994	26.8116	25.8627	23.4834	26.1221	25.6414	21.1471	24.4582	26.0769	23.5507
P63037	Dnaja1	DnaJ heat shock protein family (Hsp40) member A1	29.2667	29.3374	29.1389	29.5438	29.3008	28.5507	29.4259	29.226	29.1465	29.1183
Q8BK03	Miga2	mitoguardin 2	24.1186	23.2519	24.122	23.9989	23.1729	21.4108	23.0368	23.2488	24.5965	22.4259
Q9CQE5	Rgs10	regulator of G-protein signalling 10	20.475	22.7413	25.6076	23.5081	23.807	21.4108	24.8962	20.4312	20.4312	20.6289
Q9JIG8	Praf2	PRA1 domain family 2	25.6705	25.1961	25.5033	25.7807	24.8328	26.1488	26.228	25.9838	24.743	26.1893
Q8CGP0	None	None	27.4206	27.9112	27.6044	29.3165	28.5607	29.2428	29.4611	28.6548	27.8361	28.745
Q9CYI4	Luc7l	Luc7-like	26.3969	24.373	25.0514	25.426	24.4264	24.0102	23.6023	23.8092	25.5994	24.9425
E0CXN5	None	None	26.8097	25.3846	25.7137	26.1352	26.3634	26.3045	25.4469	25.23	23.9429	26.1003
P12382	Pfkl	phosphofructokinase, liver, B-type	29.3409	29.5537	29.3573	30.0031	29.282	29.633	29.64	29.9515	29.4748	29.995
Q3THG9	Aarsd1	alanyl-tRNA synthetase domain containing 1	25.5357	25.4959	25.8435	25.109	24.2331	23.787	25.5908	24.8547	25.0867	23.577
A0A1L1SUX8	None	None	32.3862	32.4314	32.6128	32.6128	32.1105	32.6835	32.5625	32.5849	32.3551	32.7802
E9Q175	None	None	26.4709	26.2829	27.0205	26.5611	26.4661	26.564	26.6084	26.8691	26.9173	26.8399
P18242	Ctsd	cathepsin D	27.0326	26.8988	27.4432	26.5861	27.3117	26.7627	26.7567	27.0205	26.9366	26.6335
Q8R1B4	Eif3c	eukaryotic translation initiation factor 3, subunit C	27.3503	27.3398	28.4431	27.4405	27.0415	26.7502	26.9056	27.158	27.6897	27.1076
Q8VCL2	Sco2	SCO2 cytochrome c oxidase assembly protein	20.475	20.4312	20.4312	24.4209	24.6395	21.4108	24.5139	23.3064	24.2753	25.2453
Q3TSR0	Extl2	exostosin-like glycosyltransferase 2	25.1861	24.0839	24.271	25.2253	24.8999	25.6804	25.6102	25.011	24.6206	24.9187
P41105	Rpl28	ribosomal protein L28	29.1485	28.3993	28.798	27.6816	28.4774	28.4474	27.5024	28.0198	28.5921	27.7148
Q91Z67	Srgap2	SLIT-ROBO Rho GTPase activating protein 2	27.8014	28.9698	28.2578	28.0237	28.1963	27.4884	28.0584	28.1995	28.1537	27.6618
Q9CR00	Psmd9	proteasome (prosome, macropain) 26S subunit, non-ATPase, 9	22.382	24.0673	22.9214	21.5315	22.4722	23.8926	24.128	22.5719	23.9244	22.6015
Q4VBE8	Wdr18	WD repeat domain 18	23.9067	20.475	21.9789	20.4312	22.7355	23.9941	21.1471	23.7334	22.5151	24.284
Q8BWS5	Gprin3	GPRIN family member 3	28.9584	29.1389	29.1445	28.7162	29.3165	29.2001	29.2781	29.1429	29.3409	29.0864
P35279	Rab6a	RAB6A, member RAS oncogene family	31.1929	30.7603	30.7235	31.2506	30.7987	31.6547	31.4246	31.6861	30.2938	31.6861
B2RXQ6	None	None	22.2736	22.9501	23.4938	22.614	21.4108	21.4108	22.5923	21.8771	22.6603	20.6289
E9Q6J8	None	None	24.9447	24.4582	24.9316	25.5485	25.7688	25.4814	26.4339	25.6678	24.8624	25.5889
P54285	Cacnb3	calcium channel, voltage-dependent, beta 3 subunit	25.7994	26.3586	25.1898	26.2861	22.2155	26.5861	26.1003	25.8599	26.2664	26.4243
Q9WUM4	Coro1c	coronin, actin binding protein 1C	30.3383	30.1484	30.2095	30.2095	30.1233	30.2735	30.0031	30.1445	29.6521	30.1657
Q3TFP0	Srsf10	serine and arginine-rich splicing factor 10	25.034	25.8282	24.7356	26.0002	24.6302	25.7589	26.1688	25.3062	25.4285	25.7807
Q8BH80	Vapb	vesicle-associated membrane protein, associated protein B and C	27.8867	27.3648	27.541	27.357	27.9037	27.4474	26.553	27.3343	27.7746	27.3233
Q8BUY5	Timmdc1	translocase of inner mitochondrial membrane domain containing 1	23.6161	23.9067	23.741	23.5261	20.45	23.5031	21.1471	21.8526	20.4312	22.493
A0A2R8VK70	None	None	26.0327	25.2888	25.4399	26.2311	25.7561	26.8979	26.8097	25.7377	25.448	26.1723
O08582	Gtpbp1	GTP binding protein 1	24.6053	23.643	24.935	24.905	24.9055	23.6653	24.5752	23.0893	24.7332	24.2369
Q99L27	Gmpr2	guanosine monophosphate reductase 2	25.3565	25.2221	25.8014	23.6945	25.6233	25.0488	24.5993	24.0269	25.2215	23.1124
Q61151	Ppp2r5e	protein phosphatase 2, regulatory subunit B', epsilon	28.4214	28.4026	28.3415	28.9116	27.8674	28.2508	28.9215	28.7117	28.621	28.8308
Q61699	Hsph1	heat shock 105kDa/110kDa protein 1	30.9502	30.894	30.8544	30.7987	30.7785	30.7373	30.4535	30.7987	30.9798	30.6804
E9QKZ2	Ipo9	importin 9	25.52	25.1898	25.8418	24.5456	25.5655	24.5867	23.395	25.1505	25.3426	25.261
P05213	Tuba1b	tubulin, alpha 1B	30.7085	31.0415	30.819	30.8053	30.2213	30.819	30.4674	29.5862	30.1764	30.7461
O70251	Eef1b2	eukaryotic translation elongation factor 1 beta 2	25.6568	24.34	23.6161	26.237	24.5023	26.2091	25.606	25.1264	25.8412	25.1245
E9PVA8	Gcn1	GCN1 activator of EIF2AK4	21.8628	21.7683	24.2408	24.0538	23.3621	24.5522	24.1496	22.8056	24.1703	23.775
Q80Y24	Prickle2	prickle planar cell polarity protein 2	26.3548	27.1396	27.2121	25.8521	25.9867	26.1847	26.1273	24.5694	27.0447	24.9813
Q9CTY5	Micu3	mitochondrial calcium uptake family, member 3	26.3314	27.0587	27.3936	27.0472	26.7665	26.7553	27.6515	27.5817	26.9069	27.4528
Q9JHW2	Nit2	nitrilase family, member 2	24.6456	24.2331	25.0214	24.4595	25.5516	25.7863	25.2109	25.5779	24.095	26.0983
A0A338P7E5	None	None	28.1406	28.7111	28.9018	29.2667	28.2739	28.4375	29.2235	29.0937	28.917	29.4629
P20917	Mag	myelin-associated glycoprotein	27.4999	26.2072	26.8383	27.2214	27.5308	27.3192	26.7643	26.3999	25.2825	26.6718
Q6R891	Ppp1r9b	protein phosphatase 1, regulatory subunit 9B	29.3458	29.7045	29.7162	29.468	29.8267	29.5201	29.4403	29.2667	29.7162	29.2893
Q9WV92	Epb41l3	erythrocyte membrane protein band 4.1 like 3	30.7716	30.7688	31.4934	30.7785	30.6575	30.3872	30.7785	30.5971	30.8863	30.631
Q61625	Grid2	glutamate receptor, ionotropic, delta 2	24.0631	20.4312	23.7433	21.1851	20.45	21.4108	21.1471	20.4312	20.6289	20.6289
A0A140T8T4	None	None	28.1932	27.462	27.8547	28.0648	26.735	28.0444	28.3269	27.9439	27.9124	27.9541
Q924M7	Mpi	mannose phosphate isomerase	25.6213	25.2825	25.5674	24.8209	25.7207	25.757	23.1996	25.3249	22.5406	25.5137
Q9CPU0	Glo1	glyoxalase 1	26.8647	26.0491	25.4219	26.9312	25.6988	26.8581	26.2059	26.5914	26.5676	27.0415
P60487	Pdxp	pyridoxal (pyridoxine, vitamin B6) phosphatase	28.6933	28.9864	28.9957	29.1406	29.0113	29.0641	29.2567	29.0496	28.9647	29.0917
Q8BWW3	Pgm3	phosphoglucomutase 3	25.4658	25.5946	25.8446	25.848	26.2217	24.9794	25.7531	25.6988	24.7456	25.9537
Q61137	Astn1	astrotactin 1	27.0205	27.6	27.5131	26.5814	27.4038	26.5553	26.5579	27.1122	27.5978	26.128
Q9Z110	Aldh18a1	aldehyde dehydrogenase 18 family, member A1	27.4898	27.0235	27.1679	27.1452	27.1396	26.9558	27.1007	26.6541	27.086	27.2807
Q9CZV8	Fbxl20	F-box and leucine-rich repeat protein 20	25.2558	22.2666	22.9785	22.1774	23.6369	24.2622	23.1044	21.5552	20.4312	20.6289
H7BX22	None	None	26.9173	27.2949	27.0255	26.3999	27.3972	26.7413	26.564	26.4957	27.0674	26.792
Q61029	Tmpo	thymopoietin	26.7775	27.2233	26.7846	27.1235	26.5843	26.6074	27.3629	27.3887	27.4585	27.0285
P23242	Gja1	gap junction protein, alpha 1	28.4128	29.0464	29.0434	28.5607	29.0494	29.282	29.4157	29.0434	28.9945	28.6686
Q8R0Y8	Slc25a42	solute carrier family 25, member 42	25.349	26.0019	26.2059	25.3535	25.4937	25.6942	25.7417	26.0886	25.9623	26.4269
A0A0N4SVG2	None	None	26.8342	25.9759	26.6084	26.4788	26.2829	27.4242	26.5392	26.6384	26.5579	26.552
A0A0R4J275	Ndufa12	NADH:ubiquinone oxidoreductase subunit A12	30.7652	30.8384	30.8126	30.5629	30.8126	30.8384	30.5799	30.3674	30.8269	30.4332
Q6NS52	Dgkb	diacylglycerol kinase, beta	30.4055	29.9365	30.4314	30.4421	29.9501	30.2223	30.2981	30.6231	30.6965	30.3513
P68368	Tuba4a	tubulin, alpha 4A	29.8267	29.0065	29.0937	29.6585	29.7135	29.3374	30.1698	29.6635	30.0322	29.633
Q8BP67	Rpl24	ribosomal protein L24	27.6664	27.5184	27.7261	28.1551	26.9497	27.9247	27.6931	27.9976	27.7775	28.0105
Q9EPR4	Slc23a2	solute carrier family 23 (nucleobase transporters), member 2	23.0789	20.4312	22.5943	21.3819	20.475	21.4108	21.1471	20.4312	20.4312	20.6289
P62264	Rps14	ribosomal protein S14	28.7602	28.1199	28.7995	28.5669	28.1455	28.6188	28.8681	28.5941	28.8384	28.5607
Q8CGK7	Gnal	guanine nucleotide binding protein, alpha stimulating, olfactory type	30.3887	30.6284	30.2672	30.9204	30.5166	30.7146	30.8448	30.8126	30.3547	31.1398
P47757	Capzb	capping actin protein of muscle Z-line subunit beta	24.8135	23.5786	23.498	24.1061	24.2661	24.6621	23.2826	23.8986	22.8128	22.5492
A2A543	Cacnb1	calcium channel, voltage-dependent, beta 1 subunit	27.7887	27.7815	28.3111	27.6264	27.9378	27.0048	27.7338	27.7956	27.8631	27.7261
P63001	Rac1	Rac family small GTPase 1	31.337	31.5121	31.3709	31.4766	31.3841	31.0541	31.4065	31.4065	31.4118	31.2834
Q9DC70	Ndufs7	NADH:ubiquinone oxidoreductase core subunit S7	29.7741	29.7162	29.6948	29.2893	29.8432	29.5726	29.3329	28.8512	29.7007	29.6272
A0A0B4J1E7	None	None	25.4414	24.6426	24.5414	21.4528	25.1697	24.2651	21.1471	20.4312	25.3617	22.0674
O55026	Entpd2	ectonucleoside triphosphate diphosphohydrolase 2	27.4223	27.2589	27.403	27.4764	27.2537	26.8062	27.0498	27.2828	26.9973	27.6515
Q99L88	Sntb1	syntrophin, basic 1	25.6813	25.0521	23.7874	23.2711	25.171	23.0182	23.1556	24.7837	22.8411	24.8565
P00158	CYTB	cytochrome b	24.1105	24.0451	24.7053	24.1673	23.8986	25.2134	24.7863	24.732	23.3977	25.2572
Q64310	Surf4	surfeit gene 4	24.6857	23.5109	23.9429	24.3247	23.7776	24.2898	24.0366	20.4312	23.8208	22.666
Q9DC50	Crot	carnitine O-octanoyltransferase	24.1673	24.1899	23.843	24.506	24.0839	23.798	25.3182	24.2753	25.6294	24.2348
P16858	Gapdh	glyceraldehyde-3-phosphate dehydrogenase	35.2477	35.2477	35.2477	35.2477	34.8398	35.2477	35.2477	35.2477	35.4603	35.2477
A0A5H1ZRL7	Trp53bp1	transformation related protein 53 binding protein 1	24.3928	24.9083	23.895	23.2763	21.5339	21.4108	21.1471	22.5923	25.3306	20.6289
F6RJ39	None	None	25.7321	26.128	26.0134	26.7108	25.7137	21.4108	26.8691	26.0217	26.319	20.6289
Q14BB9	Map6d1	MAP6 domain containing 1	20.475	22.9472	24.9771	20.4312	21.1778	23.8626	24.756	20.4312	24.6991	24.271
P62911	Rpl32	ribosomal protein L32	28.039	27.5872	27.9877	28.0105	26.2457	27.6343	26.7476	25.6705	27.6278	26.8428
Q6PGI2	Dcx	doublecortin	23.2711	25.0449	26.0838	25.1279	25.7027	25.2144	25.7217	26.1067	25.9144	25.674
E9QL53	Cit	citron	26.7008	28.3172	28.2914	26.2107	28.247	23.9989	27.8547	25.515	28.4874	25.571
O09111	Ndufb11	NADH:ubiquinone oxidoreductase subunit B11	27.2048	27.2276	27.7402	27.1115	27.5364	27.541	27.2372	26.7129	27.1053	27.0152
Q9EP53	Tsc1	TSC complex subunit 1	25.1542	25.5231	25.8695	25.2263	25.7771	25.8107	25.1986	24.9961	25.3317	24.2601
Q3U0M1	Trappc9	trafficking protein particle complex 9	26.5832	26.6074	26.3453	27.2598	26.0354	25.6504	26.0141	26.1508	26.8062	26.3453
Q8R2Y8	Ptrh2	peptidyl-tRNA hydrolase 2	25.4676	25.7854	26.3032	25.7207	26.3499	26.5449	25.4834	24.8008	20.4312	25.1861
P48771	Cox7a2	cytochrome c oxidase subunit 7A2	24.5139	25.6796	24.8638	26.1003	24.4407	26.6718	24.6214	26.7224	25.6487	25.4035
Q9DAK9	Phpt1	phosphohistidine phosphatase 1	25.0764	25.7174	24.8424	24.7911	25.5796	25.4423	21.1471	24.4875	25.034	24.5934
P63325	Rps10	ribosomal protein S10	25.4496	24.848	25.4834	25.3021	24.4075	25.6705	26.0547	24.8022	25.5062	25.401
E9PUM4	Tln2	talin 2	30.3977	30.5861	30.5235	30.7461	30.7461	30.5799	30.7085	30.894	30.7567	30.6359
Q7TSJ2	Map6	microtubule-associated protein 6	32.4088	32.6426	32.4653	32.4314	32.695	32.3419	32.3862	32.2864	32.7245	32.1669
A0A668KLV9	None	None	24.8682	26.1723	24.8344	24.5279	26.6433	26.7179	24.9223	26.356	26.2829	26.24
A0A0R4J0Z3	Aqp4	aquaporin 4	24.7292	22.6407	22.1273	24.1197	24.4161	23.916	22.5943	23.0671	20.4312	22.8439
Q8BPN8	Dmxl2	Dmx-like 2	31.6193	31.5919	31.488	31.5599	31.4159	31.6014	31.4652	31.5599	31.8323	31.704
O88531	Ppt1	palmitoyl-protein thioesterase 1	24.918	23.0272	21.4925	21.4925	22.3511	24.255	24.3033	24.794	21.5278	24.1467
A0A2R8VJW0	None	None	20.475	23.4383	20.4312	23.6475	22.467	23.185	24.2918	23.2245	21.5552	23.791
H7BX74	None	None	20.475	24.7729	24.8373	23.7268	21.1695	23.8453	23.3971	25.0698	24.1163	25.0549
Q8CC88	Vwa8	von Willebrand factor A domain containing 8	26.9973	27.114	27.3563	26.3954	27.0001	26.6097	26.6953	26.893	26.958	26.5092
P58404	Strn4	striatin, calmodulin binding protein 4	25.3337	25.9278	26.3466	25.7661	26.5968	26.3118	25.7716	27.4084	26.0163	26.9689
Q5DU25	Iqsec2	IQ motif and Sec7 domain 2	25.4793	26.8544	27.1452	26.4243	27.1842	24.1047	26.3135	24.95	28.1275	24.0134
Q9D0R8	Lsm12	LSM12 homolog	23.8986	23.6383	23.6358	23.775	23.6091	21.4108	24.1186	23.2961	23.6752	22.9568
E9PUA3	Iqsec1	IQ motif and Sec7 domain 1	24.2491	24.1628	24.2245	24.0839	23.6673	24.5825	21.1471	23.9177	24.4264	20.6289
Q5PR73	Diras2	DIRAS family, GTP-binding RAS-like 2	28.5713	28.6579	28.7663	28.4197	28.3373	28.5644	28.5396	28.7634	28.7398	28.759
P97855	G3bp1	G3BP stress granule assembly factor 1	25.2678	25.1784	25.6426	25.2095	23.7315	24.6526	25.9002	25.5428	26.5328	25.3978
D3Z6I4	Cryzl1	crystallin zeta like 1	24.3008	24.4489	24.2514	23.6404	24.5378	24.2317	21.1471	23.6945	22.9705	24.8073
P39876	Timp3	tissue inhibitor of metalloproteinase 3	20.475	23.6404	20.6337	23.4164	20.475	21.4108	23.2025	23.0338	23.395	23.0272
Q9EQF6	Dpysl5	dihydropyrimidinase-like 5	32.5322	32.6835	32.5849	32.5849	32.5625	32.5625	32.7245	32.7608	32.5477	32.6835
Q8CFR5	Dtna	dystrobrevin alpha	26.918	27.0403	26.4883	26.7895	27.7014	27.1043	26.7602	26.7511	26.5611	25.7994
Q8R366	Igsf8	immunoglobulin superfamily, member 8	29.546	29.3517	29.3686	28.917	29.3676	29.4176	29.162	28.8667	28.8716	29.24
Q9QXV8	Spry2	sprouty RTK signaling antagonist 2	23.352	21.8526	22.3765	20.4312	20.4312	23.979	21.1471	22.7619	22.0881	23.4872
Q9WV32	Arpc1b	actin related protein 2/3 complex, subunit 1B	23.6945	24.5456	20.4312	25.0196	24.5796	24.5093	21.1471	20.4312	23.702	20.6289
Q8QZV4	Stk32c	serine/threonine kinase 32C	25.5788	24.9945	26.147	26.1273	25.583	25.3565	25.9095	24.506	24.4138	25.7508
Q9CQM9	Glrx3	glutaredoxin 3	26.7909	25.8994	26.7279	26.4113	26.1138	27.285	26.4957	26.8116	26.0704	27.1209
P30275	Ckmt1	creatine kinase, mitochondrial 1, ubiquitous	32.4501	32.7928	32.7058	32.8838	32.5477	32.501	33.0844	32.9242	32.7802	32.9242
A0A087WRE8	None	None	28.1356	27.6943	27.1339	27.3936	27.5131	26.4981	27.7463	27.2411	27.4839	27.1278
D3Z4J9	Eml1	echinoderm microtubule associated protein like 1	25.5163	25.231	26.9909	25.5994	24.9574	25.8215	21.1471	25.2109	25.2753	24.8055
Q8BXA5	Clptm1l	CLPTM1-like	25.0355	23.6739	24.0301	24.4503	22.5643	25.2558	25.7273	23.6653	23.741	25.3231
Q9Z2W9	Gria3	glutamate receptor, ionotropic, AMPA3 (alpha 3)	25.3762	24.8474	24.9813	24.9972	25.4374	21.4108	24.993	24.7804	24.7491	25.0319
Q0P5X1	Lrriq1	leucine-rich repeats and IQ motif containing 1	26.3571	26.0179	20.4312	20.4312	20.4312	26.9188	26.9101	20.4312	25.4305	26.3118
A2AWA9	Rabgap1	RAB GTPase activating protein 1	26.8724	26.918	26.9426	25.4208	27.2349	26.575	26.319	25.7498	26.7495	25.0808
P35486	Pdha1	pyruvate dehydrogenase E1 alpha 1	32.2695	32.3862	32.4088	32.4088	32.4653	32.0428	32.4653	32.101	32.4501	32.2695
A0A087WQE6	None	None	25.0214	25.1865	23.0454	24.2098	25.2694	25.251	23.9286	23.4092	22.0278	23.734
P35564	Canx	calnexin	29.5413	29.6248	29.7045	29.9934	29.83	29.5862	29.1558	29.867	29.1579	29.7959
Q07235	Serpine2	serine (or cysteine) peptidase inhibitor, clade E, member 2	24.2395	24.8148	22.8936	24.0703	22.0881	28.0756	23.6588	23.0789	25.8154	24.2317
A0A0A0MQC7	None	None	33.1572	33.0283	33.1698	32.7245	33.0844	33.0283	32.7802	32.7058	33.1937	32.4653
Q6EDY6	Carmil1	capping protein regulator and myosin 1 linker 1	21.8771	22.0231	23.9229	22.5462	25.137	21.4108	22.7369	21.209	23.2453	22.081
A0A0J9YUD5	None	None	22.9501	24.5214	24.3008	24.1381	23.9286	21.4108	24.524	24.0301	23.2615	22.5878
Q61081	Cdc37	cell division cycle 37	26.7461	27.0656	26.7502	27.3955	27.2565	27.2349	26.8208	27.6525	27.1829	27.6917
Q9CPQ3	Tomm22	translocase of outer mitochondrial membrane 22	25.5006	25.2865	25.696	25.6119	25.5127	25.5788	25.3306	25.2172	25.5258	25.3209
O55022	Pgrmc1	progesterone receptor membrane component 1	26.1273	23.9543	25.261	25.6198	25.8154	27.0115	25.5978	25.7589	25.171	26.5445
Q9D358	Acp1	acid phosphatase 1, soluble	24.7779	24.3133	23.9989	25.4163	24.4138	25.3535	26.1393	24.9574	23.9578	25.3291
Q80Y17	Llgl1	LLGL1 scribble cell polarity complex component	26.7224	26.6414	26.3233	26.9209	26.9426	26.792	26.3873	26.269	26.3011	26.7548
P0C0A3	Chmp6	charged multivesicular body protein 6	26.0904	25.4937	25.9951	25.0026	26.228	21.4108	25.1523	26.1326	25.9951	24.2689
P63213	Gng2	guanine nucleotide binding protein (G protein), gamma 2	28.7614	28.2086	26.463	27.6917	27.9359	27.8719	26.9389	26.514	27.7699	26.9266
P26040	Ezr	ezrin	27.5933	27.9976	28.0732	27.2121	27.6816	27.5963	27.0227	27.6185	27.8755	26.7074
Q8CIV8	Tbce	tubulin-specific chaperone E	23.0501	24.255	25.0781	25.349	25.1245	24.3551	25.7976	25.0368	25.4937	25.3846
Q8VBV7	Cops8	COP9 signalosome subunit 8	22.5796	23.0789	21.3986	24.0644	20.9953	21.4108	21.1471	21.3767	23.0368	20.6289
P20357	Map2	microtubule-associated protein 2	31.7756	32.4088	32.501	31.8539	32.1355	32.1791	33.8037	32.3419	32.5849	32.0428
P46935	Nedd4	neural precursor cell expressed, developmentally down-regulated 4	26.5471	27.2519	27.1194	26.8521	26.9173	27.3359	27.1076	26.9787	27.2811	26.9312
A0A2I3BRW0	None	None	24.4336	20.4312	20.4312	25.7589	20.4312	25.1542	24.8988	25.531	20.4312	25.315
P03921	ND5	NADH dehydrogenase subunit 5	27.5515	27.2565	28.0472	26.9842	28.7926	27.6382	27.5614	26.5627	27.6264	26.5814
P02798	Mt2	metallothionein 2	25.6188	25.5739	24.8352	25.0775	24.7662	25.4842	25.0846	23.1022	25.2558	23.5805
Q5XKN4	Jagn1	jagunal homolog 1	26.5198	26.3416	26.2107	23.9683	26.2762	26.9118	21.1471	24.6739	25.8014	23.6358
Q9Z268	Rasal1	RAS protein activator like 1 (GAP1 like)	29.2567	29.236	29.1417	29.3971	29.226	28.9484	29.5201	29.3441	29.8202	29.6211
Q9QUP5	Hapln1	hyaluronan and proteoglycan link protein 1	28.9725	28.7699	28.9281	28.6229	28.5396	29.0937	28.6263	28.9957	28.8055	29.1389
P53986	Slc16a1	solute carrier family 16 (monocarboxylic acid transporters), member 1	26.4845	26.1424	26.7179	26.2883	26.7438	26.5984	26.4779	25.9691	26.3104	25.6854
Q99NB1	Acss1	acyl-CoA synthetase short-chain family member 1	26.2259	26.7413	26.0863	27.0587	26.4883	25.7672	26.4243	26.7789	26.2612	25.4658
Q06890	Clu	clusterin	23.5234	24.5965	25.0623	22.8897	25.1429	25.7561	24.0597	25.0781	25.0781	24.6575
O35668	Hap1	huntingtin-associated protein 1	25.8599	28.0323	27.2087	26.8691	27.6664	24.4439	26.6744	26.5181	27.4691	26.4677
Q8R5L3	Vps39	VPS39 HOPS complex subunit	22.6976	20.6289	21.7101	21.1203	20.45	21.4108	24.122	22.6015	22.52	20.6289
O88544	Cops4	COP9 signalosome subunit 4	24.6739	24.7491	24.5093	25.2215	24.5522	24.5433	24.2878	24.4407	24.2477	24.9899
A0A1W2P882	None	None	27.3324	27.2986	27.3029	27.4084	26.8607	27.3324	28.1149	28.0451	27.2121	27.0587
Q3UHK6	Tenm4	teneurin transmembrane protein 4	28.2304	28.0648	27.8462	28.0918	28.0427	27.5473	27.8474	28.2961	28.0323	27.5131
Q9DCT5	Sdf2	stromal cell derived factor 2	25.2064	25.6155	25.363	25.4469	26.1517	26.1162	24.1916	25.3337	25.4051	23.6945
E0CXZ1	None	None	25.1436	25.7923	25.8175	26.1336	24.9548	25.571	26.4307	25.9576	25.6499	25.9791
P17183	Eno2	enolase 2, gamma neuronal	30.2447	30.1398	29.9415	30.5128	30.1569	30.5971	30.1398	30.9668	30.1314	30.3456
P97807	Fh1	fumarate hydratase 1	31.1069	30.819	30.9341	30.8608	31.1029	31.337	31.1607	31.3841	30.6575	31.2096
P47199	Cryz	crystallin, zeta	27.4662	27.403	27.1153	27.7237	27.7222	27.8813	27.7499	27.6305	27.271	27.9808
Q8CHT0	Aldh4a1	aldehyde dehydrogenase 4 family, member A1	27.957	27.8526	28.2863	27.3412	27.7035	27.5775	26.8031	27.6287	28.1637	27.1829
Q9R1V4	Adam11	a disintegrin and metallopeptidase domain 11	26.6771	26.9461	26.8724	26.4957	25.3659	26.5457	25.9184	25.8175	25.9184	26.1215
O08807	Prdx4	peroxiredoxin 4	25.9002	25.4567	26.0002	26.0886	20.4312	26.6064	26.3211	26.2624	25.5889	26.2217
Q9CZM2	Rpl15	ribosomal protein L15	28.9957	27.8674	28.1307	28.857	27.2805	28.9333	28.9569	28.4327	28.5997	28.3993
Q922R8	Pdia6	protein disulfide isomerase associated 6	28.2696	27.8934	27.9287	28.4514	27.9402	28.6819	28.3012	28.3975	27.9902	28.1537
P51859	Hdgf	heparin binding growth factor	23.4353	22.4722	20.4312	23.2053	20.4312	24.6133	22.662	22.2868	22.5719	22.851
Q6GQT9	Nomo1	nodal modulator 1	27.7261	27.7604	27.5145	27.957	27.6	27.8867	27.3856	27.3955	27.7237	27.2749
Q99LS3	Psph	phosphoserine phosphatase	24.255	22.5544	23.4425	23.1327	26.2569	23.4383	21.1471	23.1661	20.4312	24.8373
Q3UZI5	None	None	25.8233	25.0769	25.7377	26.2636	24.2222	26.8647	25.3551	25.5095	26.2488	26.024
A2AKD7	Snta1	syntrophin, acidic 1	26.836	26.673	26.1296	26.228	26.2133	26.5814	26.1105	25.8418	26.4981	25.0826
P43275	H1f1	H1.1 linker histone, cluster member	26.4269	25.9117	25.84	26.2072	25.9482	26.0821	26.673	25.0549	23.1924	25.4525
P70168	Kpnb1	karyopherin subunit beta 1	28.6229	28.5581	28.9484	28.8832	29.0937	28.9622	28.7513	29.5266	28.745	29.3165
A0A0G2JFB2	None	None	25.6259	26.239	25.8718	25.6001	25.5739	25.3231	28.93	28.9989	25.8354	25.3588
P60766	Cdc42	cell division cycle 42	29.0348	29.1094	29.24	28.7926	29.6248	29.0494	28.9886	28.8257	29.1756	28.7568
Q78ZA7	Nap1l4	nucleosome assembly protein 1-like 4	25.2172	25.2678	25.6944	24.6223	24.4379	25.6294	23.7334	24.4418	24.7627	24.1434
A0A2I3BQJ1	None	None	21.9171	22.2186	24.0703	20.4312	23.0272	24.8135	21.1471	24.6507	23.2891	23.4938
O88737	Bsn	bassoon	31.6861	32.0355	32.0428	31.6091	32.019	31.3709	31.5394	31.6673	32.2695	31.2584
A2ALL9	Atp2b3	ATPase, Ca++ transporting, plasma membrane 3	29.5385	29.4593	29.0972	29.3823	29.5537	29.3441	29.3784	29.327	28.9256	29.3008
P42669	Pura	purine rich element binding protein A	29.7649	29.4286	29.7687	29.8778	29.4722	29.6948	29.7687	29.7741	30.1257	29.7135
P47791	Gsr	glutathione reductase	27.738	27.8255	27.6355	27.9877	27.6793	28.2535	28.0963	28.039	27.4242	28.049
Q6ZQ29	Taok2	TAO kinase 2	25.6146	25.6735	25.1772	23.9286	25.0947	25.2028	21.1471	25.1632	25.8899	20.6289
Q8R3R8	Gabarapl1	GABA type A receptor associated protein like 1	25.3291	24.7076	24.8663	24.1899	24.9813	21.4108	24.5522	23.5317	25.8122	23.995
E9Q0A4	None	None	22.6501	23.2395	23.4164	25.5841	22.2808	21.4108	22.5492	23.1729	24.0451	20.6289
P08003	Pdia4	protein disulfide isomerase associated 4	28.4431	28.754	28.93	28.6304	28.7505	27.7604	28.1071	28.847	29.1485	27.7338
F6SQH7	None	None	20.475	22.4583	20.4312	24.5378	21.2709	23.971	24.2973	23.5895	20.4312	23.498
Q8C605	Pfkp	phosphofructokinase, platelet	31.1317	30.6027	30.7987	31.0052	30.712	30.9443	30.9668	30.9988	30.955	31.0052
Q9DC33	Hmg20a	high mobility group 20A	21.9823	20.4312	21.4679	23.7949	20.4312	21.4108	22.8768	22.0335	23.0941	23.2245
Q9CZ04	Cops7a	COP9 signalosome subunit 7A	26.6707	27.159	26.5457	26.9669	26.8964	26.9708	26.9341	27.2247	27.2986	26.7511
Q9CZ28	Snf8	SNF8, ESCRT-II complex subunit, homolog (S. cerevisiae)	22.5978	24.0689	24.6182	23.7367	23.7334	24.752	24.6395	23.1378	24.8429	24.2797
A2A699	Fam171a2	family with sequence similarity 171, member A2	26.0734	25.5622	26.6097	25.9861	26.2739	26.9769	26.6414	26.2217	26.0682	26.147
O55042	Snca	synuclein, alpha	31.4065	31.2506	31.6673	31.4246	31.6547	31.6333	31.551	31.8647	31.3289	31.8246
Q925N0	Sfxn5	sideroflexin 5	29.9078	29.577	29.8103	29.7411	29.9318	29.7411	29.6001	29.6989	29.6299	29.8202
F8WJB9	Evl	Ena-vasodilator stimulated phosphoprotein	27.1531	27.4367	27.0747	27.6044	27.2949	27.3117	27.2565	27.2087	26.7846	27.1545
F8VQK3	Gucy1a2	guanylate cyclase 1, soluble, alpha 2	26.9728	26.1003	26.319	27.1278	26.7129	25.9162	26.4661	26.6237	26.4677	26.3125
Q9D020	Nt5c3	5'-nucleotidase, cytosolic III	20.475	20.475	22.4049	20.916	22.6066	21.4108	21.1471	21.836	23.3305	23.4113
P24547	Impdh2	inosine monophosphate dehydrogenase 2	27.2519	26.6737	27.0304	26.3314	26.6744	26.7985	25.8412	25.9879	27.1946	26.237
Q9QXS6	Dbn1	drebrin 1	28.9647	29.0552	28.9215	28.634	29.3823	29.7478	29.04	30.3872	28.6467	29.197
Q9QUR6	Prep	prolyl endopeptidase	27.6382	27.7956	28.2246	27.9884	28.4819	28.7276	27.7674	28.2426	28.7301	28.1594
Q9CR51	Atp6v1g1	ATPase, H+ transporting, lysosomal V1 subunit G1	29.2961	29.2781	29.1527	27.7148	29.1094	28.4224	28.1973	28.4474	29.1809	28.0328
Q80V26	Bpnt2	3'(2'), 5'-bisphosphate nucleotidase 2	23.9472	22.8585	22.292	20.4312	21.4864	21.4108	21.1471	22.2514	21.4576	20.6289
Q9DBH5	Lman2	lectin, mannose-binding 2	20.475	22.8539	24.511	24.2689	24.9447	24.373	24.2601	25.9206	23.1169	25.3523
P49443	Ppm1a	protein phosphatase 1A, magnesium dependent, alpha isoform	27.0255	26.7933	26.6414	26.8618	27.6161	27.0205	21.1471	26.8074	26.5181	26.3548
Q8R1T1	Chmp7	charged multivesicular body protein 7	24.4379	25.5053	25.0394	25.2152	24.2369	25.1264	24.6022	23.9051	24.5833	24.2395
O08810	Eftud2	elongation factor Tu GTP binding domain containing 2	26.3646	26.3211	26.0682	26.8062	26.5901	26.918	26.7108	26.7713	26.1352	26.7822
Q810U3	Nfasc	neurofascin	23.8268	22.9584	22.6921	23.6686	22.2223	24.3221	24.3796	23.4495	22.2666	24.0733
A0A0U1RNL7	None	None	24.8235	26.8832	26.9069	24.1559	24.7963	25.1429	25.401	24.3928	24.7988	23.7735
P25444	Rps2	ribosomal protein S2	29.3661	29.2528	29.1863	29.8202	28.4634	29.387	29.394	29.6532	29.327	29.83
Q9D051	Pdhb	pyruvate dehydrogenase (lipoamide) beta	30.3147	29.6041	30.2343	30.7194	30.4314	30.6888	30.6027	30.6965	29.9894	30.7967
P60335	Pcbp1	poly(rC) binding protein 1	28.9484	29.0258	29.122	29.1613	29.492	28.674	28.7711	29.3517	28.9281	29.0724
Q80YX1	Tnc	tenascin C	27.1267	25.9482	26.918	26.9082	25.755	27.664	25.6146	27.7126	26.7224	28.5831
Q8CA95	Pde10a	phosphodiesterase 10A	30.2981	29.9515	30.6027	30.3994	30.1722	30.4898	30.3741	30.5166	30.1834	30.7785
P10639	Txn1	thioredoxin 1	23.8642	23.2488	26.9932	25.4582	24.4875	25.2678	25.8521	25.2349	25.8086	26.1634
Q8CG76	Akr7a5	aldo-keto reductase family 7, member A5	27.9055	27.5687	27.6703	27.7662	27.3258	27.5145	25.9879	27.5515	27.2276	27.8341
F6SLP4	None	None	27.3366	27.4206	27.0285	26.7279	27.8867	27.3544	26.9127	27.198	26.2777	26.9743
Q99MR8	Mccc1	methylcrotonoyl-Coenzyme A carboxylase 1 (alpha)	27.2647	26.167	25.9791	27.2224	26.609	27.2411	27.8459	27.1076	26.5851	26.6509
Q9CXY6	Ilf2	interleukin enhancer binding factor 2	27.7823	27.5809	27.1501	28.059	27.4144	28.3079	28.2304	28.1594	27.117	27.851
P15209	Ntrk2	neurotrophic tyrosine kinase, receptor, type 2	27.479	27.4144	27.9014	27.7679	27.6987	27.9489	27.5933	28.4261	27.357	28.3659
Q80U57	Rims3	regulating synaptic membrane exocytosis 3	20.475	22.4966	20.6289	21.401	20.6289	23.0302	21.1471	20.9674	21.3767	22.6501
E9QN98	Dpp10	dipeptidylpeptidase 10	28.5607	28.9215	28.754	29.1828	28.7711	28.9095	29.1863	29.2001	28.586	29.4092
Q8K4Z5	Sf3a1	splicing factor 3a, subunit 1	26.6566	27.2908	26.7643	27.2098	26.3999	27.0027	25.6593	26.3011	26.7461	26.7846
Q9CQN7	Mrpl41	mitochondrial ribosomal protein L41	26.2569	24.7575	25.4808	25.7067	25.5231	25.3523	21.1471	24.1486	26.0886	25.3277
O88935	Syn1	synapsin I	34.2765	34.3402	34.2952	33.9265	34.2765	34.2225	34.0032	33.96	34.2952	34.0032
A0A1D5RLB2	None	None	25.1824	24.4806	23.8092	25.0265	24.1603	25.7723	21.1471	24.4901	24.1721	20.6289
Q9D1I6	Mrpl14	mitochondrial ribosomal protein L14	20.475	25.18	23.4041	23.3971	25.011	24.1301	25.011	25.2128	25.0375	23.6686
Q921W2	Tial1	Tia1 cytotoxic granule-associated RNA binding protein-like 1	25.5231	25.0698	25.6047	25.6735	23.3064	24.9945	26.5791	26.147	25.1772	25.6107
Q9Z1X4	Ilf3	interleukin enhancer binding factor 3	29.0191	28.5758	28.6791	27.5392	28.8308	27.6735	28.5185	27.9775	28.7602	27.5199
Q61627	Grid1	glutamate receptor, ionotropic, delta 1	25.363	25.2978	25.6872	24.8222	25.4414	26.5471	25.6504	25.426	25.2172	25.4632
A0A0G2JDX4	None	None	27.1644	25.7458	26.1033	25.6092	27.1853	27.114	25.3772	24.9684	25.8546	25.347
P58158	B3gat3	beta-1,3-glucuronyltransferase 3	22.4367	21.324	22.1693	23.1802	20.4312	21.4108	23.5429	23.098	23.1454	22.1542
Q3UYV9	Ncbp1	nuclear cap binding protein subunit 1	24.1877	23.4209	23.2053	23.9203	23.5031	23.0025	25.0368	24.6359	24.6739	23.5317
Q06138	Cab39	calcium binding protein 39	29.1558	28.8029	28.8832	29.05	29.236	29.0226	28.8512	28.8779	28.8415	28.9825
Q8R1I1	Uqcr10	ubiquinol-cytochrome c reductase, complex III subunit X	28.5852	26.9101	28.1356	28.5941	28.0756	28.6263	28.7678	28.798	27.6917	28.7191
Q9R0P3	Esd	esterase D/formylglutathione hydrolase	28.6686	28.0611	28.607	28.8591	28.5113	28.7236	28.5143	28.8055	28.598	29.0956
Q64727	Vcl	vinculin	28.1125	28.5507	28.4583	28.5812	28.3203	28.0611	28.3032	28.2117	28.532	28.1973
Q05CH9	None	None	23.6773	23.0338	22.9406	24.9706	22.7619	24.0217	23.0234	26.2883	23.9516	24.2572
P63073	Eif4e	eukaryotic translation initiation factor 4E	26.9138	26.6795	26.6737	25.5739	26.9632	27.2768	24.7779	25.6126	26.5952	25.3617
Q6NVF9	Cpsf6	cleavage and polyadenylation specific factor 6	25.9867	20.4312	20.4312	24.7829	21.9171	24.732	25.52	23.5402	23.906	23.3305
Q3U741	Ddx17	DEAD box helicase 17	27.4275	27.2922	27.4965	28.3706	27.0255	27.5687	28.0864	27.8674	28.1722	27.5319
P05063	Aldoc	aldolase C, fructose-bisphosphate	31.7682	31.6861	31.6014	31.9055	32.0355	31.6976	31.6976	31.7433	31.3841	31.8137
Q3UGX2	Sptb	spectrin beta, erythrocytic	28.7954	29.122	29.0724	29.1593	28.9047	28.5921	29.264	29.6272	29.2032	29.595
G5E8T6	Magi3	membrane associated guanylate kinase, WW and PDZ domain containing 3	24.8055	25.3226	25.8041	21.209	25.4183	23.0878	24.4209	22.9829	24.6359	20.6289
Q8CCT4	Tceal5	transcription elongation factor A (SII)-like 5	26.1221	26.2203	27.2828	26.7686	26.4694	26.6475	27.3903	26.2424	27.1946	27.2386
Q8K183	Pdxk	pyridoxal (pyridoxine, vitamin B6) kinase	29.5819	29.0972	29.4737	29.7312	29.6883	29.5266	29.4593	29.8593	29.633	30.0969
Q91ZH7	Abhd3	abhydrolase domain containing 3	24.284	22.7559	22.2602	22.7696	23.3305	23.922	21.1471	20.4312	20.4312	24.0102
Q9QVP9	Ptk2b	PTK2 protein tyrosine kinase 2 beta	27.7045	27.9321	27.7945	28.2578	27.6598	27.4206	28.0472	28.7301	27.9976	29.0258
Q8CEE7	Rdh13	retinol dehydrogenase 13 (all-trans and 9-cis)	23.8203	22.8557	22.8897	24.0451	23.5567	24.1197	24.0673	24.7863	22.5329	24.4695
Q9D1P0	Mrpl13	mitochondrial ribosomal protein L13	24.0829	24.1916	28.2597	26.0704	25.3978	26.0547	24.0366	28.4514	28.005	28.5713
O55125	Nipsnap1	nipsnap homolog 1	29.5562	30.3631	30.4156	30.7085	29.8778	29.9839	30.631	30.4259	30.7856	30.6189
Q9WTM5	Ruvbl2	RuvB-like AAA ATPase 2	27.4044	27.5711	27.2485	27.7974	27.2386	28.1071	27.4884	27.8496	27.4662	27.4038
Q5SSM3	Arhgap44	Rho GTPase activating protein 44	28.1761	28.2863	27.8934	27.9541	27.7338	27.9253	28.2077	27.6355	27.8835	26.9558
O54950	Prkag1	protein kinase, AMP-activated, gamma 1 non-catalytic subunit	22.9829	21.5315	22.4333	22.5978	22.2847	24.0414	24.0816	22.3011	21.2831	23.8971
O54828	Rgs9	regulator of G-protein signaling 9	26.2217	25.4695	27.0415	26.2696	26.5763	26.0886	26.2301	26.8964	27.2201	27.3887
P60904	Dnajc5	DnaJ heat shock protein family (Hsp40) member C5	29.9335	29.684	30.0926	29.3186	30.3513	29.9894	29.7916	29.5161	29.4176	29.3573
A0A1Y7VLY2	Dock4	dedicator of cytokinesis 4	26.6384	26.4243	26.8481	26.5832	26.8074	26.5037	26.7224	27.0239	27.3583	26.7179
D3Z0D6	None	None	20.475	24.3338	25.1401	25.7137	25.4208	25.9518	26.2829	25.1523	24.5093	25.3829
Q9DB60	Prxl2b	peroxiredoxin like 2B	27.3955	26.7802	26.9312	26.3167	27.1738	27.0326	27.0611	25.71	26.5392	26.3646
Q6PNC0	Dmxl1	Dmx-like 1	26.551	26.4113	26.7548	26.7567	25.8233	25.7858	26.4447	25.4583	26.5005	26.4386
Q8BNN1	Spata2l	spermatogenesis associated 2-like	20.475	20.4312	23.9459	20.4312	20.4312	24.5993	21.1471	21.8995	21.1362	22.7559
P97445	Cacna1a	calcium channel, voltage-dependent, P/Q type, alpha 1A subunit	24.8275	25.6102	25.7872	25.4827	24.5993	23.768	23.979	24.8222	26.1389	24.6857
Q8BMG7	Rab3gap2	RAB3 GTPase activating protein subunit 2	27.6561	28.2578	27.7237	29.9335	27.9439	27.3648	27.9227	28.2805	27.4884	27.7014
Q8C5R8	Prps1l1	phosphoribosyl pyrophosphate synthetase 1-like 1	27.8106	27.6082	27.6987	27.1842	27.2743	27.0552	27.8361	26.7036	27.3798	27.2398
Q8R5C0	Mtx1	metaxin 1	24.8999	25.5075	25.5137	25.0647	25.2028	24.7332	25.0775	24.7885	24.3365	25.6918
S4R2J9	Prrc2c	proline-rich coiled-coil 2C	23.6147	25.1453	25.9856	21.9823	25.7634	24.2112	25.0769	25.6213	28.5479	25.4414
P51880	Fabp7	fatty acid binding protein 7, brain	29.7687	29.633	29.1183	29.7045	29.7593	29.6248	29.5819	29.6211	29.122	28.6017
Q6NZM9	Hdac4	histone deacetylase 4	22.4494	21.4925	20.4312	21.5516	20.4312	23.2874	22.9214	20.4312	24.2608	20.6289
Q8VC30	Tkfc	triokinase, FMN cyclase	23.5081	20.4312	22.3854	24.581	24.7873	23.074	21.1471	20.4312	22.0246	23.1556
Q8CI32	Bag5	BCL2-associated athanogene 5	26.3023	26.4688	26.2457	26.9226	26.0769	25.8342	26.3634	26.4874	26.3295	25.7077
Q8BFQ8	Gatd1	glutamine amidotransferase like class 1 domain containing 1	24.5296	24.4368	22.0126	24.3155	23.0671	22.9785	24.6829	25.4632	24.0689	25.2144
Q9R0N3	Syt11	synaptotagmin XI	25.141	24.4818	24.9872	24.1321	23.9244	21.4108	24.0462	23.6358	25.406	23.9833
Q6KAR6	Exoc3	exocyst complex component 3	27.4839	26.9689	26.7108	27.462	27.285	27.6897	27.117	27.7499	27.2456	27.2986
Q3V3Q7	Pacs2	phosphofurin acidic cluster sorting protein 2	23.8797	24.2477	21.9449	24.1186	23.0025	23.2615	25.5739	23.577	24.315	24.0414
O88543	Cops3	COP9 signalosome subunit 3	27.7148	27.3837	27.7775	27.8059	28.0105	27.7699	27.3007	27.6951	26.9226	27.8026
Q9JJV5	Cacng3	calcium channel, voltage-dependent, gamma subunit 3	26.0838	26.3634	26.2392	25.034	25.6854	25.4632	24.1047	25.7807	26.1144	25.406
P09103	P4hb	prolyl 4-hydroxylase, beta polypeptide	26.8964	26.2217	27.0891	26.6097	27.6264	26.8988	26.5181	26.5611	26.7665	25.9838
Q66JS6	Eif3j2	eukaryotic translation initiation factor 3, subunit J2	24.6677	25.113	24.581	24.8082	24.744	24.8292	24.8373	24.6485	25.3523	25.2191
P00848	ATP6	ATP synthase F0 subunit 6	27.7604	26.4845	26.8956	27.6305	23.3501	28.4448	27.9723	27.2608	26.2799	27.5145
Q8VD75	Hip1	huntingtin interacting protein 1	26.8186	27.0786	27.3192	26.3687	26.1547	25.6678	26.3662	26.5449	26.8739	26.5037
Q8BH59	Slc25a12	solute carrier family 25 (mitochondrial carrier, Aralar), member 12	32.1105	32.0428	31.9295	32.1519	31.7756	32.0035	32.1105	32.1105	32.0728	32.1519
Q9QUJ7	Acsl4	acyl-CoA synthetase long-chain family member 4	24.1831	23.8513	24.5194	25.5516	24.3994	25.3386	24.9255	24.8328	25.2678	24.2408
F7DCH5	None	None	30.0128	30.1722	30.3247	29.9515	30.289	29.6001	29.9515	29.9127	30.3998	29.9934
Q9CR13	Fmc1	formation of mitochondrial complex V assembly factor 1	24.2419	23.768	24.1426	22.2808	24.0967	21.4108	23.843	23.912	20.4312	23.916
Q8QZT2	Ccsap	centriole, cilia and spindle associated protein	25.4937	25.9175	26.0327	25.5121	26.1273	24.4481	25.251	25.347	26.7627	24.7226
P62317	Snrpd2	small nuclear ribonucleoprotein D2	28.1455	28.1061	26.8269	27.8462	27.6623	28.2055	28.2381	27.8255	28.109	27.7727
Q62074	Prkci	protein kinase C, iota	24.3671	24.7137	24.2878	22.8202	22.6976	24.2395	21.1471	24.1968	23.3754	20.6289
Q04690	Nf1	neurofibromin 1	27.8961	28.6566	28.2805	28.0198	28.5997	27.4674	27.9099	28.0323	28.5779	28.0539
Q3U2A8	Vars2	valyl-tRNA synthetase 2, mitochondrial	23.775	24.4379	24.4322	24.8914	22.8551	25.4123	24.4368	24.935	24.7053	23.6673
A0A0R4J0M9	Vcpip1	valosin containing protein (p97)/p47 complex interacting protein 1	27.2768	26.9524	26.1893	27.6863	26.7643	27.3798	27.5247	27.2811	27.3343	26.9656
Q9WV54	Asah1	N-acylsphingosine amidohydrolase 1	26.514	26.5471	24.5503	26.3701	26.3815	25.9152	26.0354	25.7906	24.5626	25.2172
Q8BRK8	Prkaa2	protein kinase, AMP-activated, alpha 2 catalytic subunit	23.8724	23.6023	23.4136	23.9762	21.1471	24.517	24.2719	24.1235	23.364	23.2453
Q9JKB1	Uchl3	ubiquitin carboxyl-terminal esterase L3 (ubiquitin thiolesterase)	20.475	24.1496	24.0939	23.8684	20.4312	21.4108	25.0141	24.6112	23.9683	24.6133
G5E8R3	Pcx	pyruvate carboxylase	30.6509	30.7085	30.6856	30.3579	30.4628	30.5013	30.3914	30.4674	30.5166	30.5435
Q8C078	Camkk2	calcium/calmodulin-dependent protein kinase kinase 2, beta	26.2355	25.5109	26.1502	26.4677	25.9206	26.6084	25.6487	27.1153	26.183	26.4845
Q9QZB7	Actr10	ARP10 actin-related protein 10	27.1568	27.4275	27.6	27.4038	27.3629	27.6561	27.7887	27.3998	27.5319	27.271
Q3UHK1	Slc2a13	solute carrier family 2 (facilitated glucose transporter), member 13	25.9791	26.8814	27.0001	26.4688	27.3007	26.0904	26.6358	26.0734	26.7279	26.4941
A0A0R4J174	Ecsit	ECSIT signalling integrator	24.341	24.2123	24.128	21.7683	25.2558	23.8465	25.583	24.4264	24.9684	24.7729
P97813	Pld2	phospholipase D2	22.0278	20.475	21.2031	20.4312	20.6289	25.261	21.1471	22.2373	20.916	20.6289
Q3UVX5	Grm5	glutamate receptor, metabotropic 5	29.2861	29.6492	29.7135	28.4583	29.4286	28.5894	28.3806	29.24	29.394	29.135
O88455	Dhcr7	7-dehydrocholesterol reductase	25.6514	25.2349	25.3544	24.2601	25.0623	24.918	25.4842	24.5023	24.1235	24.5694
P32020	Scp2	sterol carrier protein 2, liver	27.3867	27.6957	27.6185	27.5439	27.9304	26.5407	27.2214	27.7612	27.7045	27.5099
Q91XM9	Dlg2	discs large MAGUK scaffold protein 2	30.7512	30.6398	30.8384	30.3247	30.6965	29.9313	30.2095	30.3741	31.2263	30.0322
Q3TZX3	Slc25a33	solute carrier family 25, member 33	20.475	20.4312	22.4722	22.9501	22.7602	24.1721	21.1471	22.3511	22.4494	23.5722
O70480	Vamp4	vesicle-associated membrane protein 4	23.9644	25.0036	25.406	24.7738	25.2625	24.4379	25.3337	23.407	24.5182	24.3338
Q9CPW4	Arpc5	actin related protein 2/3 complex, subunit 5	26.9603	26.4729	26.8544	26.8572	26.72	28.0237	26.735	27.3707	26.2091	27.4674
Q91W86	Vps11	VPS11, CORVET/HOPS core subunit	25.2152	26.3032	25.9095	27.2411	26.4703	26.3687	26.483	27.2048	26.2253	27.2162
D3Z494	None	None	26.2059	25.9152	26.5315	25.606	27.1024	26.2762	24.8209	25.7236	26.5005	25.7217
Q9CRA4	Msmo1	methylsterol monoxygenase 1	20.475	23.1327	23.9188	23.1996	22.7181	21.4108	21.1471	24.339	20.4312	20.6289
Q61599	Arhgdib	Rho, GDP dissociation inhibitor beta	23.7268	23.1169	23.098	23.971	22.8827	23.577	23.4164	22.7438	21.3018	23.0421
A2AB60	Fmnl1	formin-like 1	20.475	23.8642	22.0674	23.3792	24.4901	22.8411	22.8551	20.4312	22.2155	20.6289
B1AX58	Pls3	plastin 3 (T-isoform)	27.3117	26.8097	26.8428	27.4528	27.3243	27.1881	26.7593	27.1738	26.0134	27.0691
E9Q0K9	None	None	25.6499	25.5324	23.9762	27.3029	25.7468	25.1943	26.9524	26.9769	25.7688	27.2572
P49446	Ptpre	protein tyrosine phosphatase receptor type E	24.5081	24.1405	24.9425	24.397	25.9951	25.696	24.6507	25.2914	24.8022	26.0134
Q80YA9	Cnksr2	connector enhancer of kinase suppressor of Ras 2	27.8462	27.6987	27.2297	27.7727	27.6731	26.1296	27.2572	27.7588	27.9055	27.2121
P55258	Rab8a	RAB8A, member RAS oncogene family	30.1257	29.8202	29.9934	29.6299	30.3674	29.995	29.9934	29.684	29.6585	29.7354
O88533	Ddc	dopa decarboxylase	28.3291	28.598	28.7614	28.6566	28.8211	28.6045	28.9381	28.7908	28.5669	28.9705
Q9DCC4	Pycr3	pyrroline-5-carboxylate reductase 3	24.6918	24.1061	23.995	24.556	24.8547	25.7263	21.1471	22.2437	23.46	24.6772
Q3U487	Hectd3	HECT domain E3 ubiquitin protein ligase 3	23.1082	24.4875	25.0742	23.9854	24.6214	25.0196	25.1436	24.9794	24.4818	23.9989
A0A3Q4EH04	None	None	28.1132	28.3373	28.049	27.4808	27.9723	26.9593	28.1509	27.2133	28.6045	26.7523
P58281	Opa1	OPA1, mitochondrial dynamin like GTPase	31.1967	31.1122	31.1698	30.9798	30.902	31.1814	31.1698	31.0953	31.2506	31.0541
P35438	Grin1	glutamate receptor, ionotropic, NMDA1 (zeta 1)	28.4693	28.3333	28.2156	28.4007	28.3032	27.4038	27.4511	28.3333	28.6933	28.299
B1AQW2	None	None	28.2426	27.2297	27.7543	27.3022	28.0159	27.2828	27.8631	27.3012	27.4441	27.329
B2RQ71	Dip2c	disco interacting protein 2 homolog C	27.5587	27.9304	27.7926	27.4223	27.4206	27.2749	27.2621	27.6161	27.6957	27.4839
Q6P1Y9	Exoc1	exocyst complex component 1	27.1609	27.5614	27.7367	27.1881	27.2922	27.4898	27.8813	27.4183	27.5184	27.4554
Q68EF0	Rab3ip	RAB3A interacting protein	22.6015	23.7841	24.1916	22.8737	23.352	23.0234	24.2395	23.788	24.9187	23.4092
Q9JJ28	Flii	flightless I actin binding protein	23.855	24.8828	25.5127	25.0125	25.4496	24.341	25.5231	25.1983	27.2014	25.6872
Q6NS60	Fbxo41	F-box protein 41	27.7712	27.9402	28.4085	27.3148	27.9838	27.1609	27.317	27.6468	28.213	27.6
Q9JJR8	Tmem9b	TMEM9 domain family, member B	25.0005	26.7074	26.4802	24.2331	26.8062	24.5709	25.5274	25.2144	26.5723	20.6289
Q9CR61	Ndufb7	NADH:ubiquinone oxidoreductase subunit B7	28.4352	28.6291	28.3312	29.1094	28.2597	28.9195	28.8257	28.6752	28.607	28.6898
Q9Z2A5	Ate1	arginyltransferase 1	29.4449	23.8008	22.8564	24.315	23.5833	21.4108	24.9574	24.7033	23.6726	20.6289
Q6PDC0	Rundc3b	RUN domain containing 3B	20.475	20.952	20.4312	25.5509	20.6289	24.2572	26.6074	25.0567	20.6289	20.6289
Q9DAU1	Cnpy3	canopy FGF signaling regulator 3	25.0742	24.9055	24.7852	22.7838	24.8373	21.4108	23.8926	24.0322	26.1215	20.6289
Q62465	Vat1	vesicle amine transport 1	29.3765	29.5819	29.1247	29.6744	29.8034	29.9415	29.851	29.9995	28.9788	30.2254
B7ZCU3	Abi1	abl interactor 1	29.5201	29.6585	29.5347	29.3573	29.4629	29.24	29.1445	29.2961	29.755	29.4157
A0A6I8MX08	None	None	27.9976	26.5737	28.7162	25.7846	25.7498	24.7137	24.2508	26.3069	28.8591	24.5841
E9QNY8	None	None	27.2805	25.7367	22.4444	27.5978	24.6371	28.9356	29.1135	26.0666	23.6673	28.0584
P61161	Actr2	ARP2 actin-related protein 2	30.4726	30.6231	30.6823	30.5013	30.4421	30.7716	30.6719	30.7652	30.3221	30.7603
P43006	Slc1a2	solute carrier family 1 (glial high affinity glutamate transporter), member 2	32.8838	32.8201	33.1247	32.7608	33.3371	33.2537	33.2537	33.5059	32.7058	33.1937
Q78IK4	Apool	apolipoprotein O-like	25.84	26.1847	26.1517	26.7265	26.298	26.0491	26.7523	26.2414	26.4913	26.9118
O35900	Lsm2	LSM2 homolog, U6 small nuclear RNA and mRNA degradation associated	22.6257	20.6289	22.1542	22.5943	21.2441	21.4108	23.098	24.8682	21.401	22.8489
A0A1D5RMC8	None	None	25.4651	26.4883	25.606	26.6384	25.7429	23.6383	25.8718	26.5723	23.4425	26.2777
O70311	Nmt2	N-myristoyltransferase 2	26.1488	25.7291	26.1203	25.9296	26.0472	26.2259	26.237	26.2107	25.8627	26.0491
Q60829	Ppp1r1b	protein phosphatase 1, regulatory inhibitor subunit 1B	27.8813	26.5037	27.9424	27.9925	27.329	28.375	27.6264	27.6682	27.6082	28.2914
P63030	Mpc1	mitochondrial pyruvate carrier 1	27.3629	28.0987	27.2756	28.5954	28.7491	27.1153	28.798	26.8201	26.6718	27.8059
Q99N92	Mrpl27	mitochondrial ribosomal protein L27	24.0217	23.4915	24.1256	24.9813	22.3056	25.7994	25.6444	24.6133	22.8631	24.0451
Q9WV55	Vapa	vesicle-associated membrane protein, associated protein A	30.0834	31.0311	30.3547	29.9627	30.4106	29.7135	30.2375	29.3799	30.7937	29.9627
Q8C008	Dzank1	double zinc ribbon and ankyrin repeat domains 1	23.4026	24.7873	24.475	22.7529	24.8308	21.4108	23.5134	23.4673	25.6107	20.6289
F8WI56	Dip2a	disco interacting protein 2 homolog A	26.0392	23.4526	24.7988	24.6918	24.341	25.4818	24.4603	21.6256	22.5462	24.4718
G5E843	Robo1	roundabout guidance receptor 1	27.1481	27.2789	27.3233	26.9743	27.1531	26.6861	25.7429	26.8814	27.6355	27.1053
D3YZU5	Shank1	SH3 and multiple ankyrin repeat domains 1	25.9278	25.9908	25.308	25.4975	25.1943	22.8936	25.5485	24.9164	26.6335	24.1673
Q9R1P4	Psma1	proteasome subunit alpha 1	28.9256	28.9672	28.5479	28.723	29.1527	28.9705	28.544	28.6992	27.6382	28.9381
P62309	Snrpg	small nuclear ribonucleoprotein polypeptide G	24.6223	25.9355	25.7047	25.9393	25.8418	25.3249	26.2675	26.4065	26.2217	25.6881
F6QA74	None	None	24.2408	25.0355	25.4959	26.3753	24.0134	24.8424	25.2418	25.755	26.0472	26.1253
Q9D7N6	Mrpl30	mitochondrial ribosomal protein L30	20.475	24.2325	25.0265	24.4875	25.3249	26.0194	26.2817	23.643	24.6857	24.6972
Q99JH7	Clstn3	calsyntenin 3	26.8208	21.368	25.7458	22.9214	22.1693	23.5261	21.1471	23.071	21.2864	23.2488
P19783	Cox4i1	cytochrome c oxidase subunit 4I1	30.2254	30.4259	30.8488	30.5235	30.8544	30.7937	30.7194	31.0311	30.3579	30.9502
A2BDX3	Mocs3	molybdenum cofactor synthesis 3	25.8618	21.6693	20.4312	25.9152	25.5013	26.0011	24.1798	25.0319	25.5357	25.6076
A0A140T8R6	Grm4	glutamate receptor, metabotropic 4	24.2098	22.2472	25.0769	23.0941	24.3452	24.8082	24.2177	23.7098	24.6897	24.6507
A0A0R4J023	Auh	AU RNA binding protein/enoyl-coenzyme A hydratase	28.5162	28.8415	28.5162	29.0065	28.2883	28.2863	28.7117	28.3524	28.7066	28.0987
Q3UHB8	Ccdc177	coiled-coil domain containing 177	25.8847	25.9162	25.9184	25.5006	26.5881	24.8706	24.9371	25.5622	26.7438	25.5163
Q61527	Erbb4	erb-b2 receptor tyrosine kinase 4	21.6817	20.6289	20.6289	22.2602	20.4312	22.8489	22.5261	23.0234	20.4312	20.6289
A0A140LHL5	None	None	29.1014	28.4609	28.4327	29.1135	29.2428	29.1389	28.1594	28.607	28.1433	28.8149
Q91V12	Acot7	acyl-CoA thioesterase 7	30.8544	30.9798	30.6359	30.955	30.4332	30.955	30.819	31.0203	30.7652	30.955
Q811I0	None	None	24.5626	24.0351	24.0351	25.1898	23.912	24.1559	24.6206	24.5574	24.825	25.3324
Q99KJ8	Dctn2	dynactin 2	23.9683	22.1453	22.7438	23.5786	21.1203	25.8122	22.9829	25.4525	20.4312	25.4752
Q9QX60	Dguok	deoxyguanosine kinase	25.6444	24.397	25.6233	24.7901	25.6037	25.8641	24.701	26.1162	25.4154	26.0904
Q9Z2V5	Hdac6	histone deacetylase 6	26.5952	26.9031	27.1967	26.5901	27.1952	26.663	26.5037	26.2777	27.3752	26.2624
Q3TWW8	Srsf6	serine and arginine-rich splicing factor 6	27.9168	27.8719	27.9402	27.3192	27.5933	27.1568	27.6863	27.5711	28.0732	25.5581
O88291	Zfp326	zinc finger protein 326	26.4471	26.4866	25.9313	25.8505	26.1597	25.0141	26.5336	26.0428	26.3416	24.7751
Q9R0P5	Dstn	destrin	30.0322	29.7999	30.1445	30.2735	29.7649	29.468	29.7604	29.9894	30.2343	29.6001
O08749	Dld	dihydrolipoamide dehydrogenase	31.8769	31.6193	31.5668	31.762	31.704	31.6673	31.6673	31.5754	31.704	31.5668
E9PW20	Chtop	chromatin target of PRMT1	26.1148	26.9312	26.5553	25.7217	27.1289	25.8695	26.6883	25.972	26.3815	25.7649
Q9QZD8	Slc25a10	solute carrier family 25 (mitochondrial carrier, dicarboxylate transporter), member 10	26.1236	26.9669	27.4511	26.514	25.4929	26.4243	26.1253	27.8361	27.1932	27.6987
B7ZNS2	Dlgap4	DLG associated protein 4	27.2297	28.2107	28.1963	27.3681	27.6343	26.5791	27.2485	27.6278	28.4327	26.2696
A2A8L5	Ptprf	protein tyrosine phosphatase receptor type F	26.5392	26.8893	26.0934	26.5494	26.3969	26.6414	25.3231	26.6659	26.0574	26.2059
Q9DBR7	Ppp1r12a	protein phosphatase 1, regulatory subunit 12A	27.1382	27.2087	28.1199	26.0597	27.357	27.2214	25.8175	27.0304	27.1881	26.1067
P97370	Atp1b3	ATPase, Na+/K+ transporting, beta 3 polypeptide	28.847	28.7349	29.0464	29.4722	28.7513	28.9672	29.12	29.1909	29.1429	29.2585
Q9DCD0	Pgd	phosphogluconate dehydrogenase	28.3333	28.3269	28.4224	28.6291	28.6319	28.3312	28.2984	28.2216	28.6167	28.3312
Q5NCF2	Trappc1	trafficking protein particle complex 1	20.475	22.7838	24.0869	24.5965	24.6772	23.859	24.1118	24.6265	23.7489	24.9371
Q59J78	Ndufaf2	NADH:ubiquinone oxidoreductase complex assembly factor 2	26.5234	26.7701	26.7461	25.9206	26.6224	26.9008	21.1471	25.0125	27.1067	26.1508
Q3TIR3	Ric8a	RIC8 guanine nucleotide exchange factor A	23.895	22.8489	22.8411	24.1405	24.9915	25.0147	21.1471	21.7578	20.6289	24.5414
Q149L6	Dnajb14	DnaJ heat shock protein family (Hsp40) member B14	24.4561	21.4864	24.2973	22.662	20.6289	21.4108	21.1471	23.3936	21.8995	20.6289
P09405	Ncl	nucleolin	29.4977	29.0149	28.9116	29.387	28.7908	29.4387	29.6075	29.3661	29.2893	28.9156
O35526	Stx1a	syntaxin 1A (brain)	30.1657	29.4176	29.8366	29.4286	30.2375	30.0866	29.0507	29.6248	29.1934	29.6863
Q9ERS2	Ndufa13	NADH:ubiquinone oxidoreductase subunit A13	28.4448	27.9424	28.3524	28.8211	28.1949	28.745	28.5881	28.5113	28.1125	28.9281
Q6PEV3	Wipf2	WAS/WASL interacting protein family, member 2	25.2028	24.1968	23.9854	25.1943	24.7817	21.4108	24.4396	24.5867	25.0999	23.8818
F8WHM5	None	None	27.6544	27.6816	27.6682	27.4052	28.1018	26.63	27.5798	27.2386	28.2843	27.0891
Q8K1C0	Angel2	angel homolog 2	24.8788	25.5163	25.6918	25.5581	25.7508	25.7681	25.9393	25.3762	25.3919	26.161
Q9D5T0	Atad1	ATPase family, AAA domain containing 1	28.9672	28.1275	27.7255	28.1132	28.9116	28.6686	27.9489	27.9997	27.7612	27.7986
Q05816	Fabp5	fatty acid binding protein 5, epidermal	30.4753	30.4314	30.2039	30.4898	30.2548	30.6719	30.1657	30.3547	29.7478	29.9461
P70122	Sbds	SBDS ribosome maturation factor	24.1337	24.5772	23.9001	20.4312	23.1169	24.2049	21.1471	20.4312	23.6091	20.6289
Q61423	Kcna4	potassium voltage-gated channel, shaker-related subfamily, member 4	24.7627	24.6149	23.9244	24.1985	24.1968	25.5779	24.3452	25.3659	23.618	24.9979
Q5F2D9	None	None	23.6731	21.2864	20.6289	20.4312	21.4904	21.4108	21.1471	20.4312	20.4312	20.6289
A0A498WGK2	Nars1	asparaginyl-tRNA synthetase 1	28.532	28.5607	27.8445	28.7505	28.4791	28.6017	28.9915	28.7101	28.3373	28.5852
Q61584	Fxr1	FMR1 autosomal homolog 1	25.9736	24.8008	24.1532	25.2961	24.1256	24.2973	25.113	24.2348	24.5378	23.855
Q9DBE8	Alg2	ALG2 alpha-1,3/1,6-mannosyltransferase	28.3079	28.6319	28.2346	28.598	28.2086	28.2739	28.6933	27.7604	28.2117	28.0328
A0A0G2JGL8	Dhx30	DExH-box helicase 30	28.634	28.6051	28.9095	24.3873	20.475	21.4108	25.4051	25.3772	24.0869	24.4658
P27612	Plaa	phospholipase A2, activating protein	27.5817	27.2048	27.2364	26.5791	27.2201	27.3148	26.2311	26.9875	27.1571	26.7158
Q9Z1K5	Arih1	ariadne RBR E3 ubiquitin protein ligase 1	24.4901	25.4374	24.2491	24.9199	24.4955	23.2973	25.7291	20.4312	25.5428	22.975
Q8BIP0	Dars2	aspartyl-tRNA synthetase 2 (mitochondrial)	24.7963	22.3716	23.6048	20.4312	23.0789	24.4489	21.1471	21.0086	21.3819	20.6289
O35136	Ncam2	neural cell adhesion molecule 2	29.5161	29.4195	29.9461	29.633	29.6001	29.3458	29.9894	29.8895	29.684	30.1233
Q9Z1D1	Eif3g	eukaryotic translation initiation factor 3, subunit G	26.7158	25.1279	26.4339	26.3365	25.8014	27.2233	26.9932	25.4035	27.0552	26.2355
Q9QZQ8	Macroh2a1	macroH2A.1 histone	28.6319	28.8528	28.5378	29.0494	28.3487	28.7191	29.2169	28.9886	28.8899	28.5507
P70206	Plxna1	plexin A1	30.3017	30.6359	30.4377	29.684	29.4308	29.4556	29.8816	29.5413	30.3977	29.5886
Q99KE1	Me2	malic enzyme 2, NAD(+)-dependent, mitochondrial	28.1794	28.2615	27.7815	30.7235	27.9902	27.4511	28.1406	28.0584	27.7974	28.3172
Q9D0J4	Arl2	ADP-ribosylation factor-like 2	24.4322	24.5023	23.2099	24.4806	23.4526	24.8395	25.1314	24.128	23.1342	26.0147
Q91YL3	Uckl1	uridine-cytidine kinase 1-like 1	24.1015	24.1486	20.4312	24.2952	23.7735	24.5194	24.2774	23.4425	24.9409	23.9614
Q2TBE6	Pi4k2a	phosphatidylinositol 4-kinase type 2 alpha	24.7863	25.1857	25.2978	25.315	25.7818	25.972	26.0983	24.7901	25.3535	25.7688
G3UZI2	None	None	26.886	27.0628	27.1881	27.2087	26.9656	27.2133	27.114	26.9031	27.2589	29.0113
P50516	Atp6v1a	ATPase, H+ transporting, lysosomal V1 subunit A	32.9598	32.7399	32.7802	32.9242	33.1247	33.1572	33.096	33.2537	32.5625	33.3055
Q8BYP3	Rhof	ras homolog family member F (in filopodia)	20.475	24.7829	21.401	25.6188	24.7683	21.4108	24.3316	20.4312	23.054	20.6289
O55100	Syngr1	synaptogyrin 1	20.475	27.7986	25.7906	27.0235	27.6287	28.5852	27.6209	28.1973	24.72	28.2521
Q99KK9	Hars2	histidyl-tRNA synthetase 2	24.7503	23.9505	23.5722	24.8467	23.756	24.1703	27.0304	24.1434	23.4209	26.3233
Q9WUA2	Farsb	phenylalanyl-tRNA synthetase, beta subunit	27.2621	24.0939	25.3107	27.1076	24.0393	27.4275	25.7695	25.3846	26.7553	26.9769
Q14BI2	Grm2	glutamate receptor, metabotropic 2	27.7699	26.7129	27.6488	26.8581	27.5024	28.1867	27.1267	27.4839	27.5427	27.7045
Q8K273	Mmgt1	membrane magnesium transporter 1	24.8424	23.5455	23.4567	26.0934	23.6302	26.0863	25.3565	24.4322	23.6248	25.9861
Q3UHH0	Atp2b2	ATPase, Ca++ transporting, plasma membrane 2	32.2738	32.2864	32.3551	32.1934	32.4314	32.4088	32.1791	32.1934	32.2738	32.1295
Q8BHE3	Atcay	ataxia, cerebellar, Cayman type	29.921	29.921	29.7593	26.4742	26.3233	29.8593	26.5253	26.9669	25.7429	27.1246
O88844	Idh1	isocitrate dehydrogenase 1 (NADP+), soluble	30.0513	30.3579	30.0669	30.0518	29.9335	30.2254	30.3017	30.1189	30.2213	30.0586
P62069	Usp46	ubiquitin specific peptidase 46	26.4767	25.4154	24.9794	26.0428	22.662	25.734	25.7444	26.3118	25.2109	26.536
P62342	Selenot	selenoprotein T	20.475	22.12	20.4312	24.128	22.3211	21.4108	23.8187	24.1381	21.368	23.9941
Q11136	Pepd	peptidase D	25.5075	24.7779	24.4806	25.076	24.284	25.6135	25.6414	23.9095	22.9501	20.6289
Q9JLJ2	Aldh9a1	aldehyde dehydrogenase 9, subfamily A1	25.5994	25.6259	26.8618	27.4585	27.5392	27.2297	28.5507	27.2695	26.1138	27.1501
Q8C446	Gabrb3	GABRB3, gamma-aminobutyric acid type A receptor subunit beta 3	25.9413	26.3969	26.2739	26.7129	25.8546	25.401	27.1209	27.3117	26.3211	27.2589
Q91W43	Gldc	glycine decarboxylase	25.7951	26.4318	26.0904	26.5676	25.2865	26.3069	25.9501	26.483	26.269	26.5914
Q9D125	Mrps25	mitochondrial ribosomal protein S25	24.8429	22.9327	20.4312	24.935	20.4312	21.4108	25.0549	24.2477	24.3758	25.2978
Q01853	Vcp	valosin containing protein	31.9854	32.2035	31.9635	32.0355	31.6091	31.8438	32.1355	32.2035	32.1791	32.0884
P58252	Eef2	eukaryotic translation elongation factor 2	31.4118	31.086	30.9927	30.9341	31.1069	30.8785	30.894	30.9443	31.3546	30.6965
P62702	Rps4x	ribosomal protein S4, X-linked	29.6662	29.0754	29.6989	29.3441	28.9195	29.4896	29.6863	29.3765	29.7411	29.3784
A0A087WSS1	Relch	RAB11 binding and LisH domain, coiled-coil and HEAT repeat containing	25.8014	25.0047	24.6395	24.6265	25.6155	26.7822	23.791	26.1984	25.586	26.6667
Q9D4H1	Exoc2	exocyst complex component 2	27.1967	27.2291	27.1278	27.2456	27.2297	27.0001	27.2233	27.4432	27.4313	27.4275
Q9D517	Agpat3	1-acylglycerol-3-phosphate O-acyltransferase 3	26.6198	26.2311	26.886	26.2457	26.8832	27.0674	27.2247	26.3548	26.7285	26.6679
Q9CQ92	Fis1	fission, mitochondrial 1	26.7036	26.5579	25.6092	25.8446	27.0522	26.269	25.141	26.0374	25.8884	26.463
Q9ERA0	Tfcp2	transcription factor CP2	20.475	23.5429	20.6289	23.9429	24.3171	21.4108	21.1471	20.4312	23.6369	20.6289
Q9DAZ9	Zfyve19	zinc finger, FYVE domain containing 19	23.476	22.5151	22.8689	20.4312	22.2472	21.4108	21.1471	20.4312	23.6383	20.6289
A0A0N4SWH0	Magi1	membrane associated guanylate kinase, WW and PDZ domain containing 1	25.9296	29.5413	26.0714	26.4855	27.1067	26.1128	26.6707	26.1647	26.1372	26.3254
Q8BFQ4	Wdr82	WD repeat domain containing 82	24.8663	24.8235	24.7751	25.6462	25.5946	23.6248	24.8318	25.0201	25.7923	24.0631
Q8K3I4	Myrip	myosin VIIA and Rab interacting protein	20.475	23.1996	20.6289	20.8235	20.475	21.4108	22.4899	20.6289	22.5978	22.0303
Q9DB75	Cdip1	cell death inducing Trp53 target 1	22.3056	20.4312	20.4312	24.4468	25.0549	21.4108	24.9915	24.3551	23.6302	24.7863
E9Q6C8	Xkr6	X-linked Kx blood group related 6	21.7969	20.4312	21.2952	22.8411	22.0674	21.4108	23.9941	22.1029	21.6693	22.6407
Q68FE6	Ripor1	RHO family interacting cell polarization regulator 1	24.8164	24.5669	24.1673	22.3191	23.7857	21.4108	23.8403	23.7467	21.5306	24.6978
Q8BFR5	Tufm	Tu translation elongation factor, mitochondrial	31.7286	31.7927	31.6976	31.5668	31.7682	31.498	31.8246	31.7682	31.5036	31.498
Q9ER72	Cars1	cysteinyl-tRNA synthetase 1	26.8269	27.2768	26.9118	26.7074	25.8175	26.2569	25.7367	26.5068	27.0786	26.14
Q9ES00	Ube4b	ubiquitination factor E4B	24.5469	23.9459	24.0673	24.1496	22.4512	21.4108	24.0829	23.7857	24.4976	20.6289
G3X922	Dnajc13	DnaJ heat shock protein family (Hsp40) member C13	24.8606	25.8521	26.8997	26.9619	25.7964	25.7807	26.886	26.7966	26.5471	26.8097
A0A0R4J0B8	Sh3gl3	SH3-domain GRB2-like 3	26.0934	26.0666	26.8116	26.774	27.0235	26.5234	26.8661	26.8062	26.7947	26.9461
P06745	Gpi1	glucose-6-phosphate isomerase 1	32.9856	32.9856	32.7608	33.1064	32.6835	32.8838	33.222	33.096	32.7928	33.1572
Q8VHE0	Sec63	SEC63 homolog, protein translocation regulator	22.9785	22.0574	21.4528	24.2177	20.4312	23.3064	23.0396	23.1299	22.3943	22.9546
Q91W39	Ncoa5	nuclear receptor coactivator 5	26.4802	27.1301	26.9101	26.9008	26.393	24.5263	27.3837	26.181	27.3012	25.2006
Q8BGX2	Timm29	translocase of inner mitochondrial membrane 29	24.3593	23.8797	25.5994	24.7627	26.2311	25.3762	25.6119	26.0769	24.4806	26.167
Q8CAK3	Shfl	shiftless antiviral inhibitor of ribosomal frameshifting	25.2289	25.5337	24.1105	24.2027	24.1496	24.507	23.9973	23.4026	25.1734	23.7433
O70503	Hsd17b12	hydroxysteroid (17-beta) dehydrogenase 12	28.0105	27.5308	27.6598	27.5553	27.6852	27.7463	26.7895	27.6867	27.5145	27.6278
Q9CS42	Prps2	phosphoribosyl pyrophosphate synthetase 2	23.9516	22.8393	22.493	23.787	22.3191	23.9806	24.507	20.4312	20.4312	20.6289
A2AMQ5	Cds2	CDP-diacylglycerol synthase 2	27.9439	27.8755	28.1722	27.5145	28.0028	28.5185	28.8308	27.6703	28.1973	27.6852
Q9CWE0	Mtfr1l	mitochondrial fission regulator 1-like	20.475	20.4312	20.4312	23.4136	23.5261	21.4108	23.8724	23.5507	20.6289	24.7226
P48758	Cbr1	carbonyl reductase 1	29.6635	29.7857	29.6211	30.1189	29.6521	29.7374	30.1895	30.048	29.5537	30.1722
Q91XF0	Pnpo	pyridoxine 5'-phosphate oxidase	23.0084	23.7588	22.9546	25.4658	24.7165	23.8986	21.1471	24.4336	22.1029	23.9386
Q9CX00	Ist1	increased sodium tolerance 1 homolog (yeast)	25.9908	27.086	26.4729	25.3511	27.2509	27.0437	26.0682	26.3605	24.7292	24.8148
Q91XH6	Vti1b	vesicle transport through interaction with t-SNAREs 1B	26.3211	27.0239	26.814	26.0769	27.0382	26.2696	26.5223	25.8203	27.0285	26.0806
Q9D7A8	Armc1	armadillo repeat containing 1	26.8893	25.9095	27.0472	26.6737	26.8162	27.2908	26.9669	27.1932	26.2602	27.1093
Q99JR1	Sfxn1	sideroflexin 1	29.481	29.481	29.3311	29.372	29.7086	29.7999	29.5683	29.7687	29.226	29.684
H3BJ37	None	None	24.8073	25.8435	26.3634	25.7321	25.3324	26.128	25.6735	25.5121	26.4198	26.0269
S4R1K2	None	None	25.1291	26.7643	20.4312	26.7378	25.8215	24.7248	24.8042	20.6289	25.3864	20.6289
P83887	Tubg1	tubulin, gamma 1	25.8298	25.4414	25.1784	25.1042	24.6559	25.0867	25.2134	24.1365	24.8682	25.3317
Q9DCL9	Paics	phosphoribosylaminoimidazole carboxylase, phosphoribosylaminoribosylaminoimidazole, succinocarboxamide synthetase	28.3611	29.1046	27.8961	27.8333	27.0786	27.7222	28.161	27.5553	27.1122	27.6793
Q9QZM0	Ubqln2	ubiquilin 2	23.2891	22.388	23.6839	24.3644	21.1362	24.9328	22.6257	24.7292	22.0035	25.3659
Q99KI0	Aco2	aconitase 2, mitochondrial	34.1429	34.2765	34.2225	34.3402	34.1429	34.2765	34.5728	34.2952	34.2765	34.1429
A0A2I3BS49	None	None	22.008	23.0156	20.4312	22.2155	20.6289	21.4108	22.9406	24.0366	20.9273	23.1169
A2APX8	Scn1a	sodium channel, voltage-gated, type I, alpha	20.475	24.7677	23.775	24.3452	23.6629	24.0967	23.9731	23.702	24.2608	25.4651
Q3UGR5	Hdhd2	haloacid dehalogenase-like hydrolase domain containing 2	27.3012	26.5436	26.7627	27.8272	27.8361	27.4144	28.3111	26.9426	27.6561	27.8598
Q9Z2I0	Letm1	leucine zipper-EF-hand containing transmembrane protein 1	29.0917	29.6922	29.2287	29.9461	29.1838	29.4308	29.9758	29.6922	29.3008	29.894
Q3U432	Gas7	growth arrest specific 7	27.2276	27.8474	27.6264	27.6623	27.7612	27.5899	27.479	26.7686	27.8891	27.2133
P47738	Aldh2	aldehyde dehydrogenase 2, mitochondrial	29.6492	29.6001	29.6585	29.5916	29.9285	30.0217	29.83	29.9758	29.3971	29.9023
O35621	Pmm1	phosphomannomutase 1	25.7649	25.6198	26.0147	25.2064	23.6383	26.147	26.3023	25.3277	24.9717	26.2424
B0V2N1	Ptprs	protein tyrosine phosphatase receptor type S	28.8959	29.4403	28.9825	29.3482	29.1828	29.0604	29.3458	29.3311	29.4286	29.3458
Q8R086	Suox	sulfite oxidase	22.7072	23.7467	23.574	20.4312	24.8429	24.3889	24.1775	25.7923	21.9611	24.2275
Q9QYS9	Qki	quaking, KH domain containing RNA binding	24.8395	24.075	24.8395	24.4489	25.0185	24.9409	24.9784	24.8492	24.9839	24.5139
E9QAD4	Ccdc93	coiled-coil domain containing 93	25.7705	25.5674	23.9614	25.2661	25.2095	23.6487	25.2028	23.1124	24.4336	26.0374
Q99P58	Rab27b	RAB27B, member RAS oncogene family	22.1947	24.4718	24.1798	22.3133	25.1523	21.4108	21.1471	24.2521	22.7619	23.9806
P80314	Cct2	chaperonin containing TCP1 subunit 2	29.5726	29.135	29.226	29.6492	29.6922	29.6989	29.8255	29.921	28.9195	30.2841
B7ZNG8	None	None	25.0898	24.1933	25.0295	20.4312	25.1734	25.4658	21.1471	20.4312	24.6149	20.6289
J3QNR6	None	None	27.4425	27.7196	27.7582	27.0152	27.9471	27.4313	27.1701	27.5067	27.5024	27.3258
P97351	Rps3a1	ribosomal protein S3A1	30.1569	29.7916	29.9313	30.0128	29.7007	29.83	29.4421	29.7946	30.1722	29.5293
A2AVJ7	Rrbp1	ribosome binding protein 1	27.4144	27.5473	27.3117	27.5067	26.836	27.3867	27.124	27.1235	27.3503	26.5901
A0A6I8MX18	Ago1	argonaute RISC catalytic subunit 1	23.5978	21.0716	23.6023	23.5722	21.4967	23.6945	21.1471	20.8691	21.2929	22.1774
Q8CBE3	Wdr37	WD repeat domain 37	28.8372	29.0937	28.9886	28.9672	29.0065	28.7117	28.7162	29.0065	29.0694	28.93
O70589	Cask	calcium/calmodulin dependent serine protein kinase	29.7916	29.1934	29.0303	28.9698	29.327	28.723	28.9156	29.0706	29.5862	28.8878
Q61879	Myh10	myosin, heavy polypeptide 10, non-muscle	24.72	23.775	24.095	20.4312	24.0269	24.8413	21.1471	20.4312	23.6588	20.6289
Q99MN1	Kars1	lysyl-tRNA synthetase 1	27.7076	25.9951	26.9669	27.8293	26.6907	27.2153	27.7543	27.3481	27.3099	27.462
Q9D1G1	Rab1b	RAB1B, member RAS oncogene family	28.3269	27.9227	28.544	28.1845	28.9256	28.3975	28.2107	28.2761	27.4898	28.2597
Q8BKZ9	Pdhx	pyruvate dehydrogenase complex, component X	29.0464	29.2893	29.5438	28.9864	29.5385	29.1046	29.372	28.9705	29.0303	29.1863
P06801	Me1	malic enzyme 1, NADP(+)-dependent, cytosolic	29.1071	29.2001	28.9622	28.798	29.0464	28.8308	28.5997	28.7926	29.3482	28.7663
Q91VK4	Itm2c	integral membrane protein 2C	27.1501	27.2411	27.1991	27.0048	26.7567	27.1531	27.0027	26.6291	27.1853	26.4767
Q8BGY9	Slc5a7	solute carrier family 5 (choline transporter), member 7	20.475	22.3765	22.008	22.094	23.086	21.4108	23.4468	23.4774	21.5339	23.7949
S4R1L5	None	None	24.5	23.8971	25.3511	23.4297	24.8788	23.3971	23.5752	24.0689	24.732	24.0538
A0A1W2P7Y9	None	None	30.0586	29.8103	30.2375	29.8267	30.0217	30.0926	29.9995	30.2405	29.9415	30.2095
Q61097	Ksr1	kinase suppressor of ras 1	25.8537	25.9526	26.2184	25.4141	26.167	25.2095	26.0186	25.0036	26.5881	24.8292
Q5SUT0	Ewsr1	Ewing sarcoma breakpoint region 1	26.0682	23.912	25.7807	26.161	25.1436	25.0775	26.3069	25.6426	26.393	26.2602
Q9CR59	Gadd45gip1	growth arrest and DNA-damage-inducible, gamma interacting protein 1	23.3688	21.2831	20.4312	24.6342	23.4567	25.2215	24.2458	20.4312	24.9447	24.6223
A2AE27	None	None	26.3152	27.3258	26.0666	26.0019	26.3011	25.9641	25.6752	26.482	26.4957	25.8154
Q8K2Y9	Ccm2	cerebral cavernous malformation 2	24.5485	24.5841	24.4161	24.8988	24.6112	24.993	23.7703	24.5194	23.576	24.68
A0A0A6YY91	None	None	32.6835	32.5322	32.6835	32.4501	32.9856	32.7245	32.5322	32.5625	32.4314	32.5322
Q99JN2	Klhl22	kelch-like 22	24.271	23.7727	22.7559	21.4576	23.7433	23.741	21.1471	20.4312	21.9171	24.0869
Q9D8P4	Mrpl17	mitochondrial ribosomal protein L17	22.388	21.9449	20.4312	24.0249	20.4312	21.4108	25.3724	22.8349	21.5315	23.3578
Q6PH08	Erc2	ELKS/RAB6-interacting/CAST family member 2	22.9086	22.0674	20.4312	24.3994	22.2069	23.9505	24.8547	23.9001	20.4312	24.3053
E9Q9C4	None	None	27.1623	27.7662	28.2565	27.1067	27.8106	27.3887	26.6291	27.2372	27.9775	27.2372
Q06185	Atp5me	ATP synthase membrane subunit e	28.7162	28.3164	28.1389	28.9074	28.4403	28.8166	28.8899	28.9698	28.0082	29.1071
Q9WUB3	Pygm	muscle glycogen phosphorylase	27.6044	26.4269	25.8302	27.7986	27.2121	26.4291	27.1679	25.7561	26.298	26.8544
Q6PAJ1	Bcr	BCR activator of RhoGEF and GTPase	28.1722	30.3547	30.5013	28.2565	30.6719	27.9304	28.6319	28.3806	30.5559	28.5881
G3X9J1	Slc8a1	solute carrier family 8 (sodium/calcium exchanger), member 1	28.005	28.1932	28.0294	27.8153	28.3333	28.2544	28.3213	28.2883	27.832	28.3879
Q80XA6	Reps2	RALBP1 associated Eps domain containing protein 2	24.7053	25.2134	25.2678	23.1299	25.5062	26.2009	21.1471	20.4312	25.3249	24.2027
Q924L1	Letmd1	LETM1 domain containing 1	24.6485	25.8412	26.4416	25.6276	23.4872	26.8428	25.4035	25.6854	25.3846	25.8446
B7ZBV9	Kcnq2	potassium voltage-gated channel, subfamily Q, member 2	26.1647	26.4159	25.9908	26.663	26.353	24.4524	25.9501	26.5763	25.9694	26.5068
B7ZMP1	Xpnpep3	X-prolyl aminopeptidase 3, mitochondrial	24.8914	24.5139	23.2579	21.9326	24.5909	24.5023	24.887	23.647	25.2453	24.1996
Q99KK7	Dpp3	dipeptidylpeptidase 3	27.6957	27.5364	27.6943	27.8719	27.9253	27.7926	28.039	28.1569	27.5652	27.832
Q9D8T7	Slirp	SRA stem-loop interacting RNA binding protein	26.552	26.6358	25.9879	26.918	25.3606	27.0891	26.5627	26.7762	26.3662	26.3211
Q9QYX7	Pclo	piccolo (presynaptic cytomatrix protein)	30.8384	31.1929	31.1607	30.8448	30.9668	30.3513	30.8701	30.8544	31.337	30.6398
A0A0G2JFX7	None	None	23.6126	23.395	24.6149	25.5816	26.0886	24.3298	25.9599	25.7137	25.1784	25.2933
Q8BL86	Mblac2	metallo-beta-lactamase domain containing 2	26.2009	26.8521	26.9743	25.6259	26.5436	26.3453	25.2501	25.9951	26.8383	25.8599
Q922H2	Pdk3	pyruvate dehydrogenase kinase, isoenzyme 3	27.2485	27.2756	27.2201	27.3544	27.2485	27.663	26.9173	26.8097	27.4052	26.183
A0A0G2JDW7	None	None	28.0315	27.8026	27.9069	28.0864	28.0237	28.1433	27.8411	26.9625	27.9997	27.7775
Lrrtm3	Hspg2	perlecan (heparan sulfate proteoglycan 2)	20.475	22.3133	25.4929	26.0327	21.8873	21.4108	25.6849	23.1327	28.3611	26.2612
O35083	Agpat1	1-acylglycerol-3-phosphate O-acyltransferase 1	25.9393	25.426	25.0147	25.3231	25.4582	25.1814	25.1632	25.9393	24.9291	24.4281
Q8R0S4	Cacnb4	calcium channel, voltage-dependent, beta 4 subunit	27.4044	26.9082	27.1067	27.5283	26.71	27.329	27.4999	27.1644	27.2214	27.3043
Q8CFE4	Scyl2	SCY1-like 2 (S. cerevisiae)	25.1934	26.0769	26.2649	26.527	26.0194	25.0584	26.8116	26.4788	27.9099	26.5198
Q9D1H6	Ndufaf4	NADH:ubiquinone oxidoreductase complex assembly factor 4	25.1352	25.6119	25.315	26.356	24.2806	25.5095	26.3605	25.6392	25.6126	25.5525
Q99LB6	Mat2b	methionine adenosyltransferase 2 non-catalytic beta subunit methionine	26.2664	26.3873	25.9694	26.24	26.4582	26.5374	26.5843	26.393	25.903	26.836
A0A1Y7VNZ6	Mark3	MAP/microtubule affinity regulating kinase 3	27.2733	27.3117	27.3386	27.2986	28.0963	26.3548	27.663	27.3648	27.5263	26.8832
Q91ZP9	Necab2	N-terminal EF-hand calcium binding protein 2	22.1372	22.861	24.743	24.1933	25.0073	24.4029	25.2888	24.8122	22.8737	25.3565
P62908	Rps3	ribosomal protein S3	29.6744	28.9074	29.9515	29.6801	29.197	29.8735	29.5726	29.3458	29.9807	29.8034
Q6P9Q6	Fkbp15	FK506 binding protein 15	22.2306	25.0141	24.341	25.1672	24.8663	23.0421	22.872	22.3943	24.517	24.918
P59326	Ythdf1	YTH N6-methyladenosine RNA binding protein 1	25.8342	25.1672	25.0647	24.8008	25.0584	24.6874	25.7723	24.6426	24.1148	25.0005
Q9QUR7	Pin1	peptidyl-prolyl cis/trans isomerase, NIMA-interacting 1	28.0918	27.8631	27.9096	28.8055	27.8835	28.2077	28.5954	28.2565	28.0816	28.4774
P15532	Nme1	NME/NM23 nucleoside diphosphate kinase 1	29.1507	29.0226	29.2961	28.3373	29.372	29.3186	28.2719	28.6045	28.8188	28.8343
Q9CQW0	Emc6	ER membrane protein complex subunit 6	20.475	22.4826	23.2763	22.4367	23.3448	21.4108	21.1471	20.4312	22.5878	22.8128
O08600	Endog	endonuclease G	20.475	20.4312	20.4312	23.9644	22.9644	23.618	23.7489	21.9171	20.4312	23.912
Q80TM9	Nisch	nischarin	26.031	26.0217	26.5445	26.0269	26.7224	25.8316	25.5137	26.3984	25.3588	26.6825
Q9JHQ5	Lztfl1	leucine zipper transcription factor-like 1	25.0514	23.9854	24.4489	23.9898	23.8283	24.5503	23.8268	24.7662	23.4353	20.6289
P70296	Pebp1	phosphatidylethanolamine binding protein 1	28.8073	28.5237	27.8813	28.81	28.1537	29.2961	28.4634	29.0552	28.0611	28.8029
Q9WTX6	Cul1	cullin 1	27.2087	26.814	27.2805	27.4999	27.4455	27.0747	27.5263	27.6488	27.5439	27.2949
P32067	Ssb	small RNA binding exonuclease protection factor La	27.9471	27.6468	27.5439	27.8411	28.0144	27.7255	27.5711	27.7402	27.9489	27.2001
Q8BYB9	Poglut1	protein O-glucosyltransferase 1	24.0134	22.6797	22.975	23.6161	20.4312	21.4108	23.8048	22.872	23.9898	30.7373
Q9Z127	Slc7a5	solute carrier family 7 (cationic amino acid transporter, y+ system), member 5	26.5861	26.1138	26.6509	25.7818	26.3651	26.5013	26.4113	25.5663	25.8372	25.9221
P10852	Slc3a2	solute carrier family 3 (activators of dibasic and neutral amino acid transport), member 2	30.1314	29.9501	30.2213	30.5435	30.5435	30.8126	30.289	30.3832	30.0769	30.819
A0A087WNU5	None	None	24.5669	25.2064	25.3062	25.7741	24.8395	21.4108	24.7248	25.6198	26.8481	20.6289
Q9WTR5	Cdh13	cadherin 13	26.453	25.9465	26.9008	25.6705	27.1991	27.4808	26.6974	26.7602	26.3254	26.706
Q9EPL2	Clstn1	calsyntenin 1	20.475	24.5909	25.7964	25.3107	23.781	25.1523	23.741	25.7077	25.0808	25.5663
P11438	Lamp1	lysosomal-associated membrane protein 1	27.8221	27.2598	27.3648	26.6667	27.7588	27.7945	27.0641	26.5843	27.0415	26.8676
P63094	Gnas	GNAS complex locus	26.5108	26.9909	26.453	27.0459	26.0491	24.8263	26.1942	26.8399	26.0806	26.9082
Q60900	Elavl3	ELAV like RNA binding protein 3	26.9069	26.3437	26.4719	26.7762	26.5234	26.5336	27.5228	27.0001	26.7008	26.4318
Q8BGB7	Enoph1	enolase-phosphatase 1	20.475	22.5261	24.3671	23.2632	23.1378	22.9406	24.0967	20.4312	20.4312	20.6289
Q9JKY5	Hip1r	huntingtin interacting protein 1 related	30.955	30.8448	29.0604	28.049	28.7777	30.2796	27.8255	28.5713	29.0724	28.1455
O35598	Adam10	a disintegrin and metallopeptidase domain 10	24.2806	25.5357	25.7589	24.8474	25.5485	25.2253	23.7588	25.406	23.6686	25.3724
Q91YR1	Twf1	twinfilin actin binding protein 1	28.5921	28.3213	28.3269	27.6957	28.5779	27.9877	27.9037	28.2055	28.5113	27.8411
P06837	Gap43	growth associated protein 43	31.1698	31.6333	31.7433	31.337	31.6976	31.2932	31.1178	31.5668	31.5668	31.2932
Q60597	Ogdh	oxoglutarate (alpha-ketoglutarate) dehydrogenase (lipoamide)	31.7104	31.9193	31.7807	32.0546	31.4246	31.762	31.9295	31.9193	32.0428	31.8438
B2RSH2	Gnai1	G protein subunit alpha i1	29.0724	28.6017	29.3799	29.2211	29.3374	29.5964	29.4308	29.3329	28.8512	29.3856
Q9R0Y5	Ak1	adenylate kinase 1	27.9838	28.4474	28.8681	29.0815	28.8166	29.0348	28.3465	29.4748	28.4693	29.4896
Q9R0D8	Wdr54	WD repeat domain 54	25.231	24.2622	23.163	25.1986	24.9425	25.5062	25.6135	25.394	23.5065	25.7531
A0A571BG95	None	None	28.9156	28.7513	28.917	28.9989	28.5122	28.8591	29.0884	28.9074	28.7236	29.1014
Q9D7X3	Dusp3	dual specificity phosphatase 3 (vaccinia virus phosphatase VH1-related)	26.3437	25.251	25.9686	26.377	25.3407	27.2014	25.5516	26.9008	25.1898	26.8956
P11031	Sub1	SUB1 homolog, transcriptional regulator	25.7273	23.8614	23.6915	25.6918	22.9607	26.9056	24.7076	24.075	23.8513	27.0093
Q9DD18	Dtd1	D-tyrosyl-tRNA deacylase 1	27.1093	24.8184	23.5317	27.2565	25.8884	26.7602	27.3563	26.3586	25.3407	26.8521
Q8BR92	None	None	25.3588	25.531	25.9056	25.1352	25.674	25.9175	25.5841	24.8344	25.2933	24.4612
Q91YJ5	Mtif2	mitochondrial translational initiation factor 2	24.1496	24.8914	21.2709	24.7709	22.4333	23.9429	24.3079	24.825	24.2797	23.9459
Q9CZX7	Pip4p2	phosphatidylinositol-4,5-bisphosphate 4-phosphatase 2	24.3796	24.1441	24.0102	24.8974	23.6161	25.0514	21.1471	20.4312	24.6575	24.5456
O54988	Slk	STE20-like kinase	26.6718	27.9121	27.8913	27.5933	27.6305	27.1555	26.8964	26.9341	28.1132	26.9127
Q4FE56	Usp9x	ubiquitin specific peptidase 9, X chromosome	29.4593	29.4358	29.135	29.4015	29.5266	28.7699	29.3482	29.4421	29.1268	29.4977
Q6NVE9	Pptc7	PTC7 protein phosphatase homolog	22.7619	21.4679	22.5329	23.3838	24.1628	24.1405	21.1471	21.1695	20.6289	23.0396
A0A1B0GX27	None	None	24.9574	26.1253	26.3646	24.5139	25.546	25.9751	23.3723	24.9784	25.7067	24.4582
P17809	Slc2a1	solute carrier family 2 (facilitated glucose transporter), member 1	26.1942	26.1151	25.8618	26.7461	25.4734	27.271	26.1448	26.2324	25.678	26.893
P70188	Kifap3	kinesin-associated protein 3	25.0026	23.7949	25.2558	24.4336	23.3936	24.524	28.5921	24.606	23.922	24.9409
Q8K212	Pacs1	phosphofurin acidic cluster sorting protein 1	29.3212	29.5916	29.7312	29.4259	29.1863	29.1417	29.3896	29.3617	29.2001	29.5413
P55264	Adk	adenosine kinase	26.7909	26.7947	26.2848	27.4855	27.1246	25.9056	27.3681	26.4913	26.552	26.575
P99029	Prdx5	peroxiredoxin 5	29.311	29.4015	29.2001	29.8332	29.5201	29.4169	29.6041	30.0322	29.24	29.9313
P24529	Th	tyrosine hydroxylase	29.4421	28.917	29.83	28.4413	29.4195	29.6744	29.2211	29.5819	29.1406	29.867
Q9CYG7	Tomm34	translocase of outer mitochondrial membrane 34	24.8148	24.4407	23.9898	25.1983	24.8624	24.1256	23.4425	25.2418	24.9371	23.2615
Q5SQX6	Cyfip2	cytoplasmic FMR1 interacting protein 2	31.5394	31.4766	31.4118	31.488	31.3956	31.4159	31.5036	31.4707	31.4934	31.8647
A0A0R4J0D3	Stt3b	STT3, subunit of the oligosaccharyltransferase complex, homolog B (S. cerevisiae)	25.5779	22.7529	23.5429	25.1697	23.2229	23.9001	25.7476	24.5263	24.3008	25.1291
E9Q7G0	Numa1	nuclear mitotic apparatus protein 1	23.0272	25.5509	23.8797	24.756	23.4113	21.4108	23.407	23.299	26.2861	20.6289
Q8BHL3	Tbc1d10b	TBC1 domain family, member 10b	26.167	26.6953	26.9266	26.7285	26.5627	26.6795	27.2127	26.5901	26.6011	26.8893
Q6PGL7	Washc2	WASH complex subunit 2	23.8403	23.9346	23.9505	24.1256	20.8235	21.4108	22.8689	22.792	22.5943	23.352
B9EHJ3	Tjp1	tight junction protein 1	27.2175	27.3867	27.4884	26.2624	27.6468	26.3437	26.3687	27.3867	27.6682	26.228
A0A1L1SV25	None	None	31.3546	31.4118	31.5919	31.5754	31.3081	31.488	31.5243	31.5919	31.3709	31.6547
Q6ZPE2	Sbf1	SET binding factor 1	28.81	28.5997	28.7873	28.3637	28.5628	28.3291	28.3079	28.6499	28.7908	28.3956
Q69ZK0	Prex1	phosphatidylinositol-3,4,5-trisphosphate-dependent Rac exchange factor 1	23.8137	26.4913	26.5627	25.4695	26.482	23.6161	26.4874	24.6149	26.1253	23.9429
Q3U2G2	Hspa4	heat shock protein 4	31.4934	31.488	31.3841	31.6333	31.2506	31.4934	31.4159	31.5036	31.8246	31.5036
A0A0R4J138	Arsb	arylsulfatase B	26.4339	26.3453	26.1688	26.9728	26.9669	25.3617	26.8074	26.6667	25.7976	26.5723
O35678	Mgll	monoglyceride lipase	27.9775	27.6793	27.7014	27.8976	27.9247	28.4791	27.7699	28.0816	27.4999	28.3226
B1AWC9	None	None	28.5237	28.2805	28.1132	27.7499	28.5507	27.9471	27.3798	28.169	27.7222	28.6579
Q9CPR5	Mrpl15	mitochondrial ribosomal protein L15	26.0547	26.2612	26.244	25.9184	25.9736	25.9849	26.2799	26.2664	26.1448	26.2311
P27671	Rasgrf1	RAS protein-specific guanine nucleotide-releasing factor 1	24.0703	25.1245	24.5867	24.7662	24.0057	23.3008	25.8154	25.5796	25.3789	25.0295
P19096	Fasn	fatty acid synthase	31.2506	31.1967	30.9204	31.2584	31.0203	31.3081	31.1524	31.2096	31.1398	31.2163
Q6GQU6	Lingo3	leucine rich repeat and Ig domain containing 3	25.223	21.965	24.1434	24.4368	25.3062	21.4108	24.9872	23.6023	23.8642	22.8658
E9Q0N0	Itsn1	intersectin 1 (SH3 domain protein 1A)	29.1429	29.04	29.1079	28.7954	28.8629	28.4007	28.7398	29.122	29.1527	28.7349
Q9Z0W3	Nup160	nucleoporin 160	21.7411	25.6487	20.952	21.4679	21.2064	21.4108	21.1471	21.2252	20.4312	22.12
Q3USB7	Plcl1	phospholipase C-like 1	24.2155	25.7417	22.7995	20.4312	22.3279	21.4108	23.299	20.4312	23.8971	20.6289
Q01097	Grin2b	glutamate receptor, ionotropic, NMDA2B (epsilon 2)	28.4053	28.4874	29.2032	28.6099	29.3329	27.3715	28.3975	28.598	29.6041	27.9168
Q9D6Z1	Nop56	NOP56 ribonucleoprotein	27.1952	26.9155	26.2883	26.147	26.0574	24.8547	26.8637	26.6433	27.0048	23.6369
Q8BHN3	Ganab	alpha glucosidase 2 alpha neutral subunit	29.5347	29.7971	29.9335	29.7478	29.6989	29.4977	29.9415	29.6585	29.6532	29.3661
E9QLL2	None	None	29.6801	29.7135	29.3147	29.8103	29.921	29.8202	29.7411	29.7354	29.9758	29.7411
Q5SRX1	Tom1l2	target of myb1-like 2 (chicken)	22.5151	22.493	20.4312	23.7201	23.2615	26.1742	23.7727	22.9327	20.4312	24.8308
A0A0G2JDM3	None	None	24.3053	22.975	22.7529	20.4312	21.8628	23.7489	21.1471	20.4312	21.8771	20.6289
Q8VDM6	Hnrnpul1	heterogeneous nuclear ribonucleoprotein U-like 1	25.7429	25.171	26.6358	25.9056	26.6953	21.4108	26.3753	26.0962	26.4779	24.6874
P11798	Camk2a	calcium/calmodulin-dependent protein kinase II alpha	32.8201	33.06	32.9856	32.7399	33.3055	32.6128	32.839	32.9598	33.096	32.7399
P61082	Ube2m	ubiquitin-conjugating enzyme E2M	28.2673	28.0427	28.0144	28.249	28.2216	28.1973	27.817	28.2719	27.8474	28.1149
Q6ZQA6	Igsf3	immunoglobulin superfamily, member 3	20.475	21.2123	21.5306	24.5051	20.4312	23.3328	23.8754	24.1061	21.4277	20.6289
Q922P8	Tmem132a	transmembrane protein 132A	24.4468	22.872	24.776	23.922	23.8008	24.2348	21.1471	23.1148	22.7072	24.9055
Q9D7S9	Chmp5	charged multivesicular body protein 5	25.6872	25.5841	25.1352	24.6289	24.8352	25.6444	24.9187	25.349	25.5509	25.6752
Q8K1M6	Dnm1l	dynamin 1-like	27.5762	27.2162	27.0552	27.285	27.3936	27.9723	27.7126	27.3243	27.0459	27.4023
Q8K1N1	Pnpla8	patatin-like phospholipase domain containing 8	25.7688	26.356	26.5152	26.2184	25.9465	25.171	25.6114	26.3135	25.9482	26.4065
Q69Z26	Cntn4	contactin 4	25.4718	26.0704	25.7476	26.2588	24.7885	25.4875	26.1265	26.4981	25.5127	26.43
Q9EQQ2	Yipf5	Yip1 domain family, member 5	24.5182	24.284	24.6829	20.4312	24.8617	23.9032	21.1471	23.2519	24.1956	20.6289
Q7TNG5	Eml2	echinoderm microtubule associated protein like 2	25.8282	25.4929	25.1145	26.5457	25.6162	21.4108	25.8298	25.9175	25.7661	25.1274
Q6PD28	Ppp2r5b	protein phosphatase 2, regulatory subunit B', beta	25.0846	25.52	25.4651	25.7498	24.5651	25.0826	26.1352	25.4651	25.4842	25.5796
Q3UNZ8	Cryzl2	crystallin zeta like 2	25.4875	23.2417	24.6289	24.7934	23.4297	24.506	24.7729	24.1798	23.071	20.6289
Q05D44	Eif5b	eukaryotic translation initiation factor 5B	24.1033	23.4372	24.0217	25.1934	20.4312	24.3796	24.72	23.4209	24.8994	24.0612
Q8R4H2	None	None	24.748	26.0838	25.9526	25.5062	25.5337	24.4658	24.1673	26.0293	25.9439	24.9574
Q61503	Nt5e	5' nucleotidase, ecto	20.475	20.6289	22.9086	22.2008	24.5	23.5455	21.1471	23.5134	22.3279	25.4219
A0A0A0MQA6	Macf1	microtubule-actin crosslinking factor 1	30.7785	30.7716	30.894	30.1764	30.5971	30.1361	30.048	30.6189	31.1698	29.9113
P46471	Psmc2	proteasome (prosome, macropain) 26S subunit, ATPase 2	28.7398	28.6229	28.7191	29.0937	28.4583	28.6767	29.6973	28.8832	28.8233	28.6593
E9Q855	Scamp3	secretory carrier membrane protein 3	28.0499	27.851	27.9122	27.8445	28.0864	28.3632	27.491	27.8293	27.479	27.7274
O08553	Dpysl2	dihydropyrimidinase-like 2	33.8037	34.1429	34.0032	34.2225	33.8458	33.9265	34.2225	34.2225	33.9265	34.2952
Q9CQL5	Mrpl18	mitochondrial ribosomal protein L18	24.6101	22.3211	20.4312	24.1628	24.3269	24.7709	21.1471	23.056	20.4312	20.6289
Q62351	Tfrc	transferrin receptor	28.213	27.4389	27.3148	26.6509	27.7402	27.3681	27.1278	27.2525	27.2949	26.9669
Q8BLV3	Slc9a7	solute carrier family 9 (sodium/hydrogen exchanger), member 7	24.905	24.2419	23.536	20.4312	24.0301	25.1653	21.1471	20.4312	23.6126	20.6289
Q80ZJ1	Rap2a	RAS related protein 2a	25.4469	25.6881	25.581	26.0217	25.4959	24.0301	25.3523	25.5392	25.2274	26.2184
Q68FH0	Pkp4	plakophilin 4	26.6744	27.4334	27.9489	25.9641	27.5427	25.6854	26.4471	26.958	27.9884	25.6462
Q8BGD9	Eif4b	eukaryotic translation initiation factor 4B	28.4634	28.2739	28.4948	27.6533	28.5294	28.3193	27.6243	27.8976	28.2508	28.2565
Q91W50	Csde1	cold shock domain containing E1, RNA binding	28.2761	28.1248	28.1125	27.6435	28.1914	26.9728	27.7823	28.2018	28.2197	27.8976
E9Q2C4	None	None	21.8995	20.4312	20.6289	21.2709	22.4049	22.8689	23.4026	20.6289	20.6289	22.6066
D3YVA2	None	None	26.2227	25.1314	25.3687	26.0923	23.8724	26.7846	25.0647	25.4752	25.4718	26.6384
Q9Z1L5	Cacna2d3	calcium channel, voltage-dependent, alpha2/delta subunit 3	29.3517	29.2111	29.677	29.1445	29.4421	29.64	29.3212	29.6662	29.1507	29.8332
Q9DC61	Pmpca	peptidase (mitochondrial processing) alpha	26.985	26.7567	26.8208	27.3071	27.4528	25.9439	26.8781	27.4662	26.2152	27.2087
Q5SV64	Myh10	myosin, heavy polypeptide 10, non-muscle	31.2584	31.3709	31.6193	31.1398	31.3546	31.0311	31.1317	31.2263	31.5599	31.1929
Q9QZB1	Rgs20	regulator of G-protein signaling 20	25.9931	24.9199	22.662	24.4901	25.757	26.1003	21.1471	24.1467	24.0249	23.4136
Q61171	Prdx2	peroxiredoxin 2	29.2111	28.745	29.1429	29.3517	29.247	29.577	29.0972	29.577	28.9484	29.3212
Q8K1A6	Cc2d1a	coiled-coil and C2 domain containing 1A	26.2817	25.8641	25.7077	26.1372	25.308	25.5439	25.7207	26.0472	25.5978	25.3544
Q9JKR6	Hyou1	hypoxia up-regulated 1	29.3008	29.0503	28.7491	28.8878	28.9356	28.7513	28.6548	28.9725	29.3239	28.1307
Q9DC51	Gnai3	G protein subunit alpha i3	27.0952	26.8481	27.0691	26.9656	27.2098	26.7713	26.3314	27.0093	26.8269	27.3563
Q8K3J1	Ndufs8	NADH:ubiquinone oxidoreductase core subunit S8	23.2579	22.479	23.4834	22.5606	22.5151	25.6198	21.1471	23.8453	23.3578	24.1105
A0A1Y7VIR0	None	None	23.2199	24.752	25.3277	25.3864	22.2186	24.3033	23.912	25.2537	25.3829	25.6119
D3Z0U5	None	None	26.63	27.3481	27.3752	27.2386	26.7939	26.9644	26.9558	27.5587	27.5199	27.4052
O70456	Sfn	stratifin	32.0035	30.6823	31.1122	30.073	31.5668	31.5754	30.1445	30.4753	30.8608	30.2548
D3Z3N4	Hnrnph3	heterogeneous nuclear ribonucleoprotein H3	27.1853	26.9008	26.3104	26.9875	27.6863	27.6618	27.0415	27.3099	27.1644	27.1323
Q8CCJ3	Ufl1	UFM1 specific ligase 1	23.5599	25.4525	25.1697	25.5053	24.4209	23.1729	23.2245	25.3298	25.2144	24.1968
P68369	Tuba1a	tubulin, alpha 1A	35.4603	35.4603	35.4603	35.4603	35.4603	35.4603	35.4603	35.4603	35.0774	35.4603
Q9D2M8	Ube2v2	ubiquitin-conjugating enzyme E2 variant 2	22.887	23.0893	20.4312	23.2519	22.9472	21.4108	23.6383	20.4312	22.5016	20.6289
P61089	Ube2n	ubiquitin-conjugating enzyme E2N	27.3725	28.8779	29.0815	27.2398	27.2445	27.5401	26.1517	28.1537	26.8074	28.2667
P26450	Pik3r1	phosphoinositide-3-kinase regulatory subunit 1	23.5134	25.2902	23.1299	24.606	24.1351	23.3578	25.581	23.855	27.2411	24.5825
Q9CWF2	Tubb2b	tubulin, beta 2B class IIB	29.6299	29.6635	29.8267	29.3212	29.8332	30.1722	29.6492	29.7086	29.7135	29.7007
Q9D0E3	Lysmd1	LysM, putative peptidoglycan-binding, domain containing 1	25.1643	25.8909	25.5559	25.7672	25.3884	25.9975	25.9518	25.2825	25.7771	25.6678
Q3TC33	Ccdc127	coiled-coil domain containing 127	23.7535	26.3999	26.3723	25.7936	25.9611	25.3906	24.7885	24.5909	25.7217	25.1436
A0A1W2P8C6	None	None	22.8411	22.792	20.4312	23.4894	20.4312	23.6404	23.5261	22.7143	20.921	23.2763
Q9DC28	Csnk1d	casein kinase 1, delta	26.2799	27.3043	26.4367	27.0977	26.7523	27.7014	26.9787	27.357	26.4318	26.8481
Q6A0D4	Rftn1	raftlin lipid raft linker 1	22.239	21.5339	23.0421	23.4113	22.5056	21.4108	21.1471	20.4312	24.0393	22.2306
Q9CPW3	Mrpl54	mitochondrial ribosomal protein L54	25.4228	21.9171	21.4277	23.0338	22.2306	21.4108	24.1899	24.0703	24.2973	24.6022
G3UYV7	None	None	25.5559	24.1877	25.1291	26.7802	24.2797	25.2152	26.24	26.9188	24.0839	27.1545
Q8VDH1	Fbxo21	F-box protein 21	24.6022	23.2826	22.7181	24.6526	22.8585	24.6075	23.7841	23.6673	24.2661	24.0393
Q505D7	Opa3	optic atrophy 3	25.4913	25.4734	24.9199	25.0355	23.9543	26.3178	25.1505	25.175	24.8638	25.23
A0A0B4J1E2	Snw1	SNW domain containing 1	24.9771	24.9595	23.618	23.6724	24.6972	23.9095	24.7575	22.3553	25.6162	20.6289
Q91VA7	Idh3b	isocitrate dehydrogenase 3 (NAD+) beta	31.8438	31.8769	31.8769	32.0728	31.5243	31.8323	32.0428	32.019	32.019	31.7927
Q6P5E4	Uggt1	UDP-glucose glycoprotein glucosyltransferase 1	27.4313	27.6682	27.285	27.5263	27.1093	27.5532	27.1623	26.7413	27.4965	27.2048
Q7TT50	Cdc42bpb	CDC42 binding protein kinase beta	28.1275	28.1594	28.4755	27.2445	28.2696	27.6044	27.3012	28.0987	28.3524	27.4898
Q9CQF8	Mrpl57	mitochondrial ribosomal protein L57	24.2689	20.4312	23.3448	21.5643	22.8768	21.4108	24.5726	24.0869	22.5923	24.3033
P61922	Abat	4-aminobutyrate aminotransferase	33.1698	33.1572	33.0844	33.2537	33.2072	32.8201	33.1698	33.1247	33.3371	32.9598
Q03517	Scg2	secretogranin II	22.0881	21.5816	20.6289	22.164	20.916	23.1169	21.1471	20.4312	23.074	22.727
Q9Z1X2	Ptdss2	phosphatidylserine synthase 2	23.618	20.4312	20.4312	23.734	20.4312	21.4108	23.7535	21.4679	22.6921	24.1337
Q8VD65	Pik3r4	phosphoinositide-3-kinase regulatory subunit 4	26.1253	25.7771	26.2488	25.9951	25.8966	25.7634	25.8354	26.551	26.0923	27.0952
A0A0N4SV66	None	None	32.1295	32.695	32.5625	32.7802	32.3551	32.0355	33.06	33.0125	33.0844	32.501
Q8CGA0	Ppm1f	protein phosphatase 1F (PP2C domain containing)	23.2905	24.1268	24.6133	24.8308	23.9516	25.1436	23.577	22.5796	23.6404	23.4383
A2AI91	Phka1	phosphorylase kinase alpha 1	26.5494	20.4312	20.4312	20.4312	26.8399	26.8186	22.8564	26.244	21.7578	26.0769
Q99JI4	Psmd6	proteasome (prosome, macropain) 26S subunit, non-ATPase, 6	27.7775	27.2537	27.6906	27.4674	27.9287	27.8272	27.6664	27.738	27.5817	27.9786
D3YUB6	None	None	26.735	26.9656	27.5247	26.893	27.6185	24.6149	26.663	26.9127	27.7795	27.0205
Q9ET77	Jph3	junctophilin 3	24.9945	23.407	23.8926	22.1083	20.4312	23.9078	21.1471	20.4312	20.4312	23.5402
P56376	Acyp1	acylphosphatase 1	25.9623	25.4469	25.5053	26.3023	25.8718	26.5353	26.7461	25.9509	24.9621	26.7224
Q8BN59	Larp6	La ribonucleoprotein 6, translational regulator	25.0047	24.4109	25.2933	22.8539	22.008	21.4108	23.971	23.6629	24.8606	20.6289
A2ATK9	Fam171a1	family with sequence similarity 171, member A1	24.6829	24.524	25.1199	21.503	24.6485	25.0567	23.7949	24.8638	25.2095	25.0066
Q8BHS6	Armcx3	armadillo repeat containing, X-linked 3	23.2453	24.5574	24.886	24.0612	20.475	21.4108	24.5263	20.4312	24.3419	20.6289
Q9WUD1	Stub1	STIP1 homology and U-Box containing protein 1	26.2381	27.7463	27.2743	26.6433	26.673	26.7129	25.6426	26.1634	27.3192	26.814
P53811	Pitpnb	phosphatidylinositol transfer protein, beta	20.475	22.6527	22.1083	25.9537	25.4423	23.9364	24.9199	24.1321	24.4109	24.3796
Q9R1Q9	Atp6ap1	ATPase, H+ transporting, lysosomal accessory protein 1	25.5095	25.433	20.772	26.5449	25.9686	25.7818	25.8282	26.1749	24.9665	26.7593
Q7TPS5	C2cd5	C2 calcium-dependent domain containing 5	25.0506	26.4028	25.9838	25.5889	25.6593	21.4108	25.8994	25.6259	25.9838	25.3704
Q8VEH5	Epm2aip1	EPM2A interacting protein 1	25.6297	25.6414	25.5075	25.9002	24.8424	24.5279	26.3167	26.4447	25.674	26.6237
Q5M8N0	Cnrip1	cannabinoid receptor interacting protein 1	27.7222	27.9099	28.2521	28.4819	28.8343	28.3432	28.7276	28.8166	27.8961	28.6992
Q9Z0H3	Smarcb1	SWI/SNF related, matrix associated, actin dependent regulator of chromatin, subfamily b, member 1	23.7588	20.4312	21.836	23.8048	20.4312	21.4108	22.8234	23.9067	24.2144	22.3588
Q61553	Fscn1	fascin actin-bundling protein 1	31.9193	32.0035	32.101	31.7682	32.0035	31.8246	31.8989	31.7927	32.101	31.7807
Q9R1R8	None	None	25.4154	22.0303	24.2123	24.2806	25.8185	25.3606	25.4445	25.1531	24.3622	24.8082
P70441	Nherf1	NHERF family PDZ scaffold protein 1	25.2537	26.1647	26.2696	20.4312	27.0063	26.7895	24.8435	26.7366	26.3135	26.483
Q9JHU4	Dync1h1	dynein cytoplasmic 1 heavy chain 1	33.0125	32.9598	32.8492	33.0125	32.8201	32.7928	32.9856	33.1572	33.06	33.0125
P63054	Pcp4	Purkinje cell protein 4	25.6119	25.3659	25.7846	25.1429	25.5841	26.3466	25.6944	25.2215	25.7797	25.5053
F8WHN4	Ralgapb	Ral GTPase activating protein, beta subunit (non-catalytic)	26.3687	26.147	25.137	26.3586	26.0269	25.4975	26.8342	26.463	26.1336	26.7285
P70302	Stim1	stromal interaction molecule 1	27.0734	26.6659	27.0048	26.4159	26.4742	26.0179	26.7265	26.5108	26.9632	26.3984
Q9CQ65	Mtap	methylthioadenosine phosphorylase	24.7279	24.8328	24.3994	20.4312	25.3864	24.8467	23.8971	20.4312	23.7433	20.6289
Q6IR34	Gpsm1	G-protein signalling modulator 1 (AGS3-like, C. elegans)	25.2215	25.5663	25.1588	25.7771	27.2087	25.5739	23.9203	25.8641	24.1916	26.4028
Q9D6J6	Ndufv2	NADH:ubiquinone oxidoreductase core subunit V2	20.475	23.5655	25.0449	24.3269	24.1877	25.0368	24.2317	24.9037	23.0421	24.6468
Q8VCT3	Rnpep	arginyl aminopeptidase (aminopeptidase B)	27.2372	26.6566	26.5436	26.4913	27.1301	27.3583	25.8215	26.6679	25.3386	26.9226
Q9D7N9	Apmap	adipocyte plasma membrane associated protein	27.5652	28.1973	27.8778	28.0427	28.1248	27.6943	28.249	27.8272	27.6	27.6435
A2AEW8	Gripap1	GRIP1 associated protein 1	27.6917	27.957	27.8341	27.5083	28.039	27.5083	27.3366	27.8341	27.7035	27.943
Q922F4	Tubb6	tubulin, beta 6 class V	28.9698	28.621	28.6686	29.1046	28.9945	28.9788	28.8415	28.8415	29.6744	28.9206
E0CZ78	Ppp3cb	protein phosphatase 3, catalytic subunit, beta isoform	27.0522	27.5247	27.2519	26.7947	28.2381	28.2346	27.3867	27.5933	27.2888	27.8153
Q5DTL9	Slc4a10	solute carrier family 4, sodium bicarbonate cotransporter-like, member 10	27.1842	27.3099	27.664	27.2724	26.8951	25.9951	27.4334	27.0459	26.9689	27.4585
Q9QZ06	Tollip	toll interacting protein	25.9117	25.3209	26.0547	25.2172	26.1067	27.2175	25.4695	25.7723	25.9751	25.9002
Q99LC3	Ndufa10	NADH:ubiquinone oxidoreductase subunit A10	30.0217	30.0797	30.2405	30.0783	30.4259	30.5435	30.0669	30.3383	29.9839	30.6254
P15327	Bpgm	2,3-bisphosphoglycerate mutase	23.3723	23.6678	22.2847	20.4312	22.479	24.3685	21.1471	20.4312	21.2123	20.6289
Q4VBD2	Tapt1	transmembrane anterior posterior transformation 1	23.0368	23.7201	26.1424	20.4312	26.5861	25.1784	21.1471	23.741	22.4413	20.6289
G3X928	Sec23ip	Sec23 interacting protein	22.2528	23.6487	24.1321	26.7179	23.971	23.1924	21.1471	23.395	23.536	24.8881
Q80XN0	Bdh1	3-hydroxybutyrate dehydrogenase, type 1	31.1877	31.3956	31.2717	31.7807	31.0084	31.4513	31.7807	31.5394	31.2163	31.4246
Q9JHK4	Rabggta	Rab geranylgeranyl transferase, a subunit	24.321	24.1985	25.5788	25.3298	26.24	23.7433	21.1471	25.8302	25.0214	25.4154
P97792	Cxadr	coxsackie virus and adenovirus receptor	27.6943	28.0584	28.0573	27.2048	28.7678	27.8361	27.3544	28.0185	27.4938	27.7126
Q8K209	Adgrg1	adhesion G protein-coupled receptor G1	23.3993	25.6107	25.1274	23.643	24.887	24.1467	23.8642	24.0733	24.5314	23.8869
Q9QXG4	Acss2	acyl-CoA synthetase short-chain family member 2	24.6289	23.7857	24.1061	25.0781	24.581	23.6091	24.8565	23.6369	24.8774	23.1996
Q8BVI5	Stx16	syntaxin 16	26.393	25.7498	26.4471	24.2861	26.3167	25.5663	24.8122	25.6937	25.5779	25.433
P62835	Rap1a	RAS-related protein 1a	29.7007	29.3896	30.0834	30.2644	29.2861	29.894	30.0834	30.0217	29.6075	30.1445
P58064	Mrps6	mitochondrial ribosomal protein S6	25.2709	24.8728	25.0879	24.4322	23.7367	25.3829	23.8351	25.5994	25.0265	25.6426
Q3UWE6	Wdr20	WD repeat domain 20	23.7505	24.2806	23.8453	22.8827	24.9961	24.2544	21.1471	23.7062	24.339	23.0251
Q91ZW3	Smarca5	SWI/SNF related, matrix associated, actin dependent regulator of chromatin, subfamily a, member 5	20.475	23.0722	22.7413	21.2896	23.979	23.2519	22.851	22.6744	24.026	22.1508
Q8C854	Myef2	myelin basic protein expression factor 2, repressor	28.9381	28.7954	28.5628	28.5736	28.8878	28.6791	28.607	28.4774	29.04	28.1845
Q80X50	Ubap2l	ubiquitin-associated protein 2-like	26.5436	26.2009	26.4779	24.5263	26.1326	26.4957	26.6718	25.546	27.1406	26.2203
Q6P8X1	Snx6	sorting nexin 6	25.2933	25.6294	25.9175	25.0957	25.3846	25.5163	25.231	25.9439	25.7137	25.8298
Q62178	Sema4a	sema domain, immunoglobulin domain (Ig), transmembrane domain (TM) and short cytoplasmic domain, (semaphorin) 4A	24.7738	24.9187	25.1672	25.5274	24.9899	25.4219	21.1471	24.9595	24.7885	25.18
S4R2F1	Cacng8	calcium channel, voltage-dependent, gamma subunit 8	28.1867	28.4375	28.7101	27.9106	28.8275	28.3059	28.4053	28.2914	28.0028	28.1949
Q9QZB9	Dctn5	dynactin 5	26.0704	22.4333	25.5369	25.4183	25.5674	26.377	25.8627	25.0933	25.5525	25.4469
Q3UZV7	Elapor2	endosome-lysosome associated apoptosis and autophagy regulator family member 2	20.475	24.2408	24.9717	22.5796	24.4481	21.4108	21.1471	22.8539	23.6147	23.1022
Q78IK2	Atp5mk	ATP synthase membrane subunit k	29.9839	29.7411	29.5014	30.2548	29.5014	29.8267	30.0586	30.2938	29.4737	30.3872
Q9D4F2	Plpp6	phospholipid phosphatase 6	23.6915	22.8411	22.0991	20.4312	21.9326	22.8768	23.8465	22.5701	21.1044	24.341
D3Z2K2	Mrps14	mitochondrial ribosomal protein S14	23.5455	23.7282	23.123	20.4312	22.9023	23.9203	21.1471	20.4312	23.163	20.6289
Q6ZQ38	Cand1	cullin associated and neddylation disassociated 1	30.6231	30.7567	30.5128	30.7373	30.7373	30.7567	30.6823	30.955	30.4377	31.1698
E9Q6H8	Plekha5	pleckstrin homology domain containing, family A member 5	24.4658	26.0392	26.2861	25.011	25.0214	24.4161	24.5934	24.4818	26.893	23.0501
Q8BWG8	Arrb1	arrestin, beta 1	27.2445	27.3629	27.3867	27.8241	27.2589	27.4839	26.482	27.2525	27.2789	27.5401
A0A1D5RLZ6	None	None	26.7476	26.3118	26.3254	25.8899	26.5092	26.7366	21.1471	26.1352	26.4694	26.2133
P70362	Ufd1	ubiquitin recognition factor in ER-associated degradation 1	26.1215	25.9491	25.4913	25.8263	24.9684	25.8302	25.2349	26.319	26.3954	25.9668
Q9ER35	Fn3k	fructosamine 3 kinase	25.433	24.6507	25.3523	24.5796	26.1723	23.7841	25.176	23.9078	26.3897	24.2123
A0A1Y7VJ48	None	None	25.5439	25.7661	25.4154	26.5013	25.2643	25.6146	25.9221	26.1144	25.6076	26.5791
Q8C3X4	Guf1	GUF1 homolog, GTPase	22.2472	22.8768	23.0272	23.4792	20.9273	21.4108	22.6797	21.4041	23.3064	20.6289
Q9CQC6	Bzw1	basic leucine zipper and W2 domains 1	24.8828	25.23	25.2888	26.0082	24.859	23.9683	21.1471	25.6076	24.905	26.269
A0A991ELE1	Ptprg	protein tyrosine phosphatase receptor type G	23.364	23.0454	23.3754	21.4379	21.7411	24.4138	21.1471	23.9229	22.8631	24.0689
O35459	Ech1	enoyl coenzyme A hydratase 1, peroxisomal	23.3501	21.394	22.3608	24.6857	26.3897	26.5282	23.8986	24.4695	22.8585	25.6037
Q91YJ2	Snx4	sorting nexin 4	27.9321	27.7499	26.8521	27.5199	27.5963	27.2572	27.3243	27.2768	26.9524	27.7679
Q9D9V3	Echdc1	enoyl Coenzyme A hydratase domain containing 1	25.606	25.0375	23.6302	25.5908	25.5137	25.2709	24.7738	24.9083	21.2709	25.1401
A8Y5P4	Map7d1	MAP7 domain containing 1	26.7108	27.3725	27.4023	25.9611	27.0115	25.4414	27.0326	26.228	27.2629	26.514
Q91XY0	Pcdhga8	protocadherin gamma subfamily A, 8	22.4757	23.185	23.7243	20.4312	23.9078	23.5833	21.1471	21.1778	23.0878	20.6289
Q3UE31	5031439G07Rik	RIKEN cDNA 5031439G07 gene	22.479	23.7367	22.4259	20.4312	26.0516	23.5188	21.1471	23.2395	21.3986	20.6289
Q9ERE7	Mesd	mesoderm development LRP chaperone	25.8354	25.5788	25.2263	23.8642	25.4154	24.2952	25.3687	24.8308	25.0947	24.4396
Q810J8	Zfyve1	zinc finger, FYVE domain containing 1	26.4957	27.1053	26.4677	26.1289	26.6679	25.4834	26.9031	25.8122	26.5914	26.5952
B9EKR1	Ptprz1	protein tyrosine phosphatase receptor type Z, polypeptide 1	29.6369	29.1313	29.64	29.6248	29.1183	30.2095	29.1638	29.6883	29.4556	29.64
Q9CQI7	Snrpb2	U2 small nuclear ribonucleoprotein B	26.7602	25.0879	24.6456	25.7923	26.9127	26.065	25.5663	24.2878	26.2414	23.9898
Z4YKM2	None	None	23.9578	26.2355	25.7417	23.6773	26.3687	24.3644	21.1471	24.8804	26.4703	24.1916
F7BAB2	Tmem132b	transmembrane protein 132B	24.2245	23.0523	24.9371	22.3943	24.5752	23.5317	23.3008	25.8041	24.3316	25.5274
Q99M07	Coa5	cytochrome C oxidase assembly factor 5	24.4439	24.044	21.5463	20.4312	24.517	21.4108	21.1471	20.4312	24.0017	22.9501
Q62132	Ptprr	protein tyrosine phosphatase receptor type R	22.0246	22.3056	20.4312	23.0272	22.3716	21.4108	24.1148	23.618	20.8691	24.0017
P70202	Lxn	latexin	26.5445	26.8572	26.5901	26.7523	26.3508	27.1382	26.5353	26.7895	26.2636	27.4474
A0A087WS96	None	None	24.075	25.2393	24.7738	23.6248	24.4396	25.6735	24.4734	24.026	22.2306	22.4156
Q9WV91	Ptgfrn	prostaglandin F2 receptor negative regulator	24.2544	24.201	26.024	22.9607	25.0372	24.9972	24.2806	25.363	24.6972	25.8537
Q01279	Egfr	epidermal growth factor receptor	23.4297	25.175	24.8328	21.324	25.2453	23.2099	23.9683	20.4312	24.8728	22.5261
Q8BHS3	Rbm22	RNA binding motif protein 22	24.6526	20.6289	20.4312	22.4494	22.6884	21.4108	21.1471	20.6289	21.782	22.0574
Q9R1T4	Septin6	septin 6	28.9095	29.2211	29.1485	29.5485	28.8832	28.8415	29.6922	29.4259	29.1313	29.5347
P54728	Rad23b	RAD23 homolog B, nucleotide excision repair protein	25.448	23.8626	25.1852	25.2888	23.7727	25.426	24.8101	24.9409	24.8008	25.4399
Q9D0D3	Mtpap	mitochondrial poly(A) polymerase	24.1628	24.6044	24.7332	24.9733	25.3742	24.3008	24.7804	23.9188	24.6075	24.9595
A0A0R4J2C2	Syt2	synaptotagmin II	26.9569	25.586	26.553	27.0628	26.4688	26.0769	26.0516	26.5436	25.6288	26.7762
Q9D6J5	Ndufb8	NADH:ubiquinone oxidoreductase subunit B8	27.1053	25.1274	23.4872	27.2276	25.9072	21.4108	25.1943	26.1742	25.1697	25.7458
Q07113	Igf2r	insulin-like growth factor 2 receptor	24.7852	24.8435	25.0957	20.4312	25.4219	21.4108	21.1471	21.8052	25.223	24.9328
E9PWX1	Dpp6	dipeptidylpeptidase 6	30.6804	30.5799	30.3383	30.7146	30.6804	30.7688	30.6965	30.7937	30.4055	30.8053
Q8VDN2	Atp1a1	ATPase, Na+/K+ transporting, alpha 1 polypeptide	33.0844	32.6689	33.06	32.7928	32.7802	32.9856	32.8201	32.6128	32.7608	32.7245
Q9CQD1	Rab5a	RAB5A, member RAS oncogene family	28.0472	27.8496	28.3333	28.1537	27.8547	28.2578	28.2521	28.544	27.5587	28.5941
A6H644	Ppp1r12b	protein phosphatase 1, regulatory subunit 12B	25.3617	25.8196	26.1326	24.5909	25.7858	25.0047	25.18	25.109	26.1508	24.4524
P54071	Idh2	isocitrate dehydrogenase 2 (NADP+), mitochondrial	29.2428	29.8267	29.6635	29.8432	29.577	29.5385	29.7045	29.851	29.9023	29.7478
Q9CZN4	Shisa9	shisa family member 9	23.5031	24.8395	25.4937	24.2419	25.223	23.8351	25.9686	25.9537	25.2914	24.7683
Q9R112	Sqor	sulfide quinone oxidoreductase	23.0134	24.1351	21.9823	23.6739	22.2514	23.7201	21.1471	20.4312	23.4938	22.6744
A2AU62	None	None	27.3798	27.7543	27.3583	26.2324	26.573	27.0285	26.0806	26.4855	28.049	24.8474
A0A0G2JFV3	None	None	23.9188	22.662	25.0355	23.5545	22.292	23.2417	24.026	24.8292	23.4041	24.6829
Q80X95	Rraga	Ras-related GTP binding A	24.9255	25.9313	25.3357	26.2762	25.6015	24.8492	25.7771	25.4305	25.347	25.3742
Q91V36	None	None	25.9526	26.0597	25.2694	25.0141	25.7417	25.6126	25.176	23.9472	25.7484	25.7137
Q4KMM3	Oxr1	oxidation resistance 1	29.7999	30.0969	29.867	29.5819	29.7162	30.3631	29.6248	29.7971	30.2291	29.8143
Q8CIN4	Pak2	p21 (RAC1) activated kinase 2	27.8361	27.8598	27.7338	28.0294	27.2411	28.0963	27.7274	27.8184	27.8867	27.8547
Q922Q8	Lrrc59	leucine rich repeat containing 59	28.0756	27.4441	27.1301	28.1761	26.9082	27.8735	27.5739	27.8241	27.8934	27.7712
Q9EQ80	Nif3l1	Ngg1 interacting factor 3-like 1 (S. pombe)	24.4612	24.506	24.2458	24.1877	25.0715	25.2825	24.3644	24.8606	23.8048	26.1688
P28738	Kif5c	kinesin family member 5C	30.112	30.0553	30.2644	30.1504	30.2841	29.9318	30.2501	29.9627	30.2447	30.103
Q91Z49	Fyttd1	forty-two-three domain containing 1	20.475	23.9095	20.6289	22.2528	22.3854	21.4108	23.0084	22.8658	23.0338	22.5978
Q9ESX5	Dkc1	dyskeratosis congenita 1, dyskerin	25.4141	25.4875	25.394	24.8663	25.4695	24.0451	25.8618	24.7279	25.7531	24.5023
Q8CE50	Snx30	sorting nexin family member 30	20.475	25.7476	25.5547	25.4676	25.6881	25.4651	25.5033	25.7429	25.1824	25.8342
Q00493	Cpe	carboxypeptidase E	25.3789	25.6705	26.2624	25.4567	26.7036	24.2458	25.2064	26.3646	25.8641	25.7484
Q9CPU4	Mgst3	microsomal glutathione S-transferase 3	29.677	29.6299	29.4276	29.867	29.4176	29.4092	30.3872	29.995	29.3212	29.8958
O35295	Purb	purine rich element binding protein B	29.24	28.8372	29.6801	29.3065	29.0884	29.5014	29.4896	29.2712	29.7626	28.9989
P08113	Hsp90b1	heat shock protein 90, beta (Grp94), member 1	30.8863	30.7235	30.7373	30.8334	30.5629	30.4674	30.9443	30.5799	30.8384	30.3221
Q01065	Pde1b	phosphodiesterase 1B, Ca2+-calmodulin dependent	30.6965	30.3456	30.7146	30.6093	30.4535	30.6509	30.6231	30.6359	30.4898	30.8384
P97379	G3bp2	G3BP stress granule assembly factor 2	28.3067	28.2667	28.1949	27.7823	28.059	28.1125	28.0611	28.1307	28.8211	28.2645
Q9CR60	Golt1b	golgi transport 1B	23.2826	23.9944	24.048	23.8268	22.1029	21.4108	22.9501	23.074	23.3723	23.9001
Q9D6R2	Idh3a	isocitrate dehydrogenase 3 (NAD+) alpha	29.6075	29.5161	29.2235	30.0866	29.5886	29.9501	29.7946	30.2039	29.1445	29.9758
Q9D1Q6	Erp44	endoplasmic reticulum protein 44	24.3551	25.2263	26.3622	25.2028	26.1352	25.4141	23.768	25.8546	25.7936	23.6383
P24472	Gsta4	glutathione S-transferase, alpha 4	26.7701	26.4957	25.6593	27.2949	26.9118	25.7649	26.9812	25.5109	25.7508	27.1153
Q9Z1M8	Ik	IK cytokine	21.6693	21.4108	22.6407	22.0991	22.1453	21.4108	22.6015	21.3819	22.1083	20.6289
A2AFG8	L1cam	L1 cell adhesion molecule	30.9726	30.7512	31.0541	30.8701	31.1929	31.2351	30.7373	30.8863	30.5128	30.8269
Q9DCP2	Slc38a3	solute carrier family 38, member 3	26.5037	25.8342	26.4028	26.4703	26.9056	27.1115	26.7169	26.6064	26.2381	26.4742
Q3TYH2	Rab15	RAB15, member RAS oncogene family	22.4826	25.1226	25.3829	22.9644	27.1967	25.9413	25.4808	25.5006	25.0514	25.1865
Q9JMD0	Zfp207	zinc finger protein 207	25.581	20.4312	24.8042	25.3407	23.0421	25.1111	25.0584	23.5599	25.0846	25.011
Q7TPH6	Mycbp2	MYC binding protein 2, E3 ubiquitin protein ligase	23.859	25.1176	24.4818	23.5534	25.3687	23.2395	24.8275	23.9989	25.4959	20.6289
Q6WQJ1	Dagla	diacylglycerol lipase, alpha	20.475	22.2736	22.5462	21.2114	23.9386	21.4108	22.5701	23.3971	22.8768	23.3888
Q9R1R2	Trim3	tripartite motif-containing 3	28.4327	28.7568	28.3203	28.4375	28.3164	28.4327	28.8124	28.5954	28.4053	28.5162
Q9JMK2	Csnk1e	casein kinase 1, epsilon	22.2808	23.9614	24.7944	20.4312	25.1291	22.9937	23.8837	23.9683	24.6371	25.5816
Q7M759	Abhd17b	abhydrolase domain containing 17B	25.3426	23.577	24.7627	25.251	24.9291	25.5428	25.3884	24.4307	24.581	25.8505
G3X8R0	Reep5	receptor accessory protein 5	28.5479	29.0191	28.7852	28.6686	30.2095	28.109	28.9149	28.634	28.9957	28.9957
P61087	Ube2k	ubiquitin-conjugating enzyme E2K	23.0893	23.2053	20.4312	20.4312	23.2961	23.734	21.1471	23.4353	22.8282	23.0302
Q3TKT4	Smarca4	SWI/SNF related, matrix associated, actin dependent regulator of chromatin, subfamily a, member 4	23.2395	24.5752	24.4237	25.4937	25.6001	24.3593	25.1111	23.0084	25.6735	20.6289
Q8BU30	Iars1	isoleucyl-tRNA synthetase 1	26.4893	24.6843	25.1469	26.8988	25.7468	25.9849	26.2861	25.9975	25.9056	26.8074
P23506	Pcmt1	protein-L-isoaspartate (D-aspartate) O-methyltransferase 1	25.2342	26.3508	24.5433	26.3211	24.9245	24.3316	23.787	26.3662	24.9595	25.313
Q9D1J3	Sarnp	SAP domain containing ribonucleoprotein	25.175	26.0428	25.4818	26.1508	25.0867	25.5963	24.4161	24.4029	26.6414	24.6677
Q3UHX2	Pdap1	PDGFA associated protein 1	26.3909	26.5832	26.7224	26.4447	26.6737	26.4028	26.6404	26.4861	26.814	27.1301
Q9ET43	Cldn12	claudin 12	23.5065	22.6744	22.8393	20.4312	22.1774	24.6265	21.1471	20.4312	20.4312	20.6289
Q8C5H8	Nadk2	NAD kinase 2, mitochondrial	27.3192	26.5407	27.2456	26.3466	27.3099	27.2048	27.2398	26.8637	27.317	27.158
Q8VDU5	Snrk	SNF related kinase	23.2356	22.4209	24.6772	20.4312	24.9187	21.4108	21.1471	22.5744	22.164	24.0057
A0A1L1SR84	Igsf9b	immunoglobulin superfamily, member 9B	22.872	26.8598	26.9632	26.4709	22.5016	21.4108	22.8349	25.8196	22.9829	26.3466
Q791V5	Mtch2	mitochondrial carrier 2	29.9113	29.4722	29.7649	29.6973	29.6801	29.7788	29.8432	29.6973	29.8366	29.7196
Q99LI8	Hgs	HGF-regulated tyrosine kinase substrate	28.3213	28.3203	28.4244	27.7463	28.3291	27.9641	28.169	27.5652	28.6188	27.8526
P98191	Cds1	CDP-diacylglycerol synthase 1	20.475	21.2709	23.5895	22.9705	22.4259	21.4108	23.7776	22.4444	22.9785	23.2711
Q8K4R4	Pitpnc1	phosphatidylinositol transfer protein, cytoplasmic 1	26.4742	28.1963	27.1093	26.7643	28.3172	27.7499	26.0019	27.7076	26.5449	26.5353
P19324	Serpinh1	serine (or cysteine) peptidase inhibitor, clade H, member 1	25.251	25.347	25.251	26.0114	23.6665	25.2865	25.664	25.8994	25.3551	25.1723
Q8C996	Tmem163	transmembrane protein 163	25.678	25.8122	25.7263	23.4209	26.3605	26.1221	21.1471	25.2753	25.076	24.8449
Q8K2C9	Hacd3	3-hydroxyacyl-CoA dehydratase 3	27.9424	28.7823	28.8211	28.8362	28.2615	28.8029	28.3706	28.7191	29.162	28.598
P35550	Fbl	fibrillarin	22.4583	24.9245	23.5507	24.3351	23.922	21.4108	21.1471	24.7332	23.4372	24.5574
Q3TPX4	Exoc5	exocyst complex component 5	27.8496	27.1531	27.5652	27.2629	27.7909	27.0723	27.0105	27.2986	28.0336	27.1615
D3YXA6	Trim46	tripartite motif-containing 46	27.6623	27.0522	27.4009	26.7627	27.0611	24.6206	27.2386	27.3503	27.8735	26.1647
Q80Z38	Shank2	SH3 and multiple ankyrin repeat domains 2	27.6488	27.8778	27.8255	27.6598	27.7578	26.2414	27.6254	27.8913	28.6017	26.3508
Q8VEJ9	Vps4a	vacuolar protein sorting 4A	27.086	26.5851	26.3586	25.9694	26.2675	27.2598	25.0265	24.8624	26.7866	26.0547
Q9CXW4	Rpl11	ribosomal protein L11	28.1949	27.1115	27.2175	28.3069	27.3412	27.985	28.2883	27.8547	27.5228	27.7945
Q8R5H6	Wasf1	WASP family, member 1	29.135	29.3065	29.2585	29.1638	29.0754	29.2893	29.1111	29.1465	29.3329	29.3482
Q9DB15	Mrpl12	mitochondrial ribosomal protein L12	23.5317	24.7018	23.056	23.2488	22.861	24.2275	21.1471	23.7489	23.9324	20.6289
Q8BW96	Camk1d	calcium/calmodulin-dependent protein kinase ID	25.9247	25.7976	25.7067	26.3634	26.3118	26.5436	26.2762	26.3152	25.5121	26.4779
Q8JZR6	Slc4a8	solute carrier family 4 (anion exchanger), member 8	23.7367	20.4312	24.2477	23.6219	20.6289	25.2914	23.5567	23.498	24.8706	20.6289
E9Q8N8	Slc4a4	solute carrier family 4 (anion exchanger), member 4	30.3221	30.2405	29.921	30.4674	30.0505	29.9335	30.3832	30.2447	29.6429	30.0797
F8WI64	None	None	23.0156	22.0419	20.4312	22.3912	22.9406	21.4108	23.618	23.4297	22.3056	22.7995
Q8R570	Snap47	synaptosomal-associated protein, 47	27.7727	27.7945	27.7699	28.1594	27.8719	28.0336	27.5392	27.6987	27.2724	28.0756
J3QJX3	None	None	23.734	26.158	24.5051	25.0947	25.696	25.2902	25.4183	25.903	25.4875	25.0867
Q60631	Grb2	growth factor receptor bound protein 2	24.9083	25.1814	25.4163	26.3437	26.5471	26.393	25.1291	26.6265	25.5109	26.7789
Q9D0A3	Arpin	actin-related protein 2/3 complex inhibitor	24.4766	23.7776	25.4589	24.5433	24.8962	25.0355	21.1471	25.1588	24.1381	24.2177
D3Z4U0	Zranb2	zinc finger, RAN-binding domain containing 2	20.475	22.0126	24.0967	22.0246	20.4312	23.7098	21.1471	21.401	23.8351	22.8325
A0A1W2P8E1	None	None	23.787	23.8268	20.921	24.0733	23.2679	24.72	23.593	23.5188	22.6407	24.4468
P52825	Cpt2	carnitine palmitoyltransferase 2	26.0044	25.8418	24.9684	26.536	24.6739	26.836	26.0895	24.8467	26.0666	26.2807
P47911	Rpl6	ribosomal protein L6	28.8055	28.1939	28.4183	29.1429	27.7148	28.7568	28.6992	28.5581	28.9698	28.4514
Q8C052	Map1s	microtubule-associated protein 1S	27.1246	27.4898	27.4727	27.479	27.4052	27.3398	27.6906	27.1093	27.7823	27.6943
Q60771	Cldn11	claudin 11	28.2615	27.7974	28.6121	28.3487	28.6392	28.6566	27.2811	27.7543	28.3012	28.383
Q9R190	Mta2	metastasis-associated gene family, member 2	22.6527	20.4312	21.9848	23.8626	22.0303	21.4108	25.3511	24.6302	23.6665	20.6289
P26049	Gabra3	gamma-aminobutyric acid type A receptor subunit alpha 3	24.4524	25.2215	24.5469	23.9516	23.6686	25.8718	24.4281	24.284	25.0957	24.044
Q56A07	Scn2b	sodium channel, voltage-gated, type II, beta	27.3029	26.856	27.3359	27.2768	27.6382	27.4999	27.2789	26.9625	26.8637	27.0552
Q5RKR3	Islr2	immunoglobulin superfamily containing leucine-rich repeat 2	23.8684	24.2572	24.8828	23.0234	24.3873	25.2537	23.6629	23.9244	24.7503	24.7053
E9QKC0	None	None	26.1336	26.0011	26.4694	25.4237	26.181	26.483	25.8014	26.6509	26.3125	25.9867
A2ARI4	Lgr4	leucine-rich repeat-containing G protein-coupled receptor 4	23.8614	23.618	23.1661	20.4312	23.5786	21.4108	25.0026	24.4831	23.2826	24.4561
H7BX26	Cep170	centrosomal protein 170	27.0239	28.3502	27.5308	27.4898	27.7956	26.5392	27.7974	27.3398	28.1939	26.5984
Q8C729	Hycc2	hyccin PI4KA lipid kinase complex subunit 2	27.3998	27.1122	27.0459	26.9056	27.5711	27.1738	27.2537	26.9056	26.9127	27.1668
Q9D8U8	Snx5	sorting nexin 5	26.7285	26.8668	27.2598	26.5336	26.3646	29.7649	27.0001	26.5407	26.7413	26.5108
P57759	Erp29	endoplasmic reticulum protein 29	27.1194	27.1323	27.1481	26.7985	27.4884	27.3725	26.3118	27.086	27.2133	26.7438
Q05512	Mark2	MAP/microtubule affinity regulating kinase 2	28.9333	29.0113	29.2451	28.7678	29.1288	28.5769	28.7301	28.8591	29.3856	28.8362
E9QK04	Neo1	neogenin	26.7179	27.9723	27.7582	26.5579	27.8526	27.6355	27.5532	27.9471	27.7956	27.3324
B1AXI2	None	None	26.6795	26.5315	27.158	26.3897	27.1571	26.0574	26.7444	26.3295	27.0747	26.6707
A0A0A6YXG0	None	None	25.2128	25.0488	25.5183	21.782	25.4632	25.9323	25.7807	24.5934	24.8101	25.223
Q920I9	Wdr7	WD repeat domain 7	30.7567	30.6719	30.6509	30.8488	30.5861	30.5235	30.7987	30.8701	30.7373	30.9668
Q924D1	Cyp2j9	cytochrome P450, family 2, subfamily j, polypeptide 9	20.475	20.6289	20.6289	23.7857	20.6289	23.0156	23.855	22.2555	20.4312	20.6289
Q8BIJ6	Iars2	isoleucine-tRNA synthetase 2, mitochondrial	28.8591	28.857	28.4609	29.1313	28.5921	28.4514	29.2111	29.2428	28.7117	29.1406
Q5RL20	Mrpl43	mitochondrial ribosomal protein L43	25.9095	25.4445	24.8235	23.8453	25.1542	24.9784	24.1467	24.4379	24.6918	25.1986
P83741	Wnk1	WNK lysine deficient protein kinase 1	22.1453	23.6196	24.2661	21.0508	20.4312	21.4108	24.935	23.2417	23.5623	22.4583
D3Z396	None	None	30.6823	30.1504	30.289	29.894	30.9726	30.8334	29.7999	30.1533	30.0518	30.0128
Q8JZX4	Rbm17	RNA binding motif protein 17	24.2589	21.782	20.4312	23.5234	20.4312	21.4108	24.852	22.3588	23.843	22.3191
Q9WUM3	Coro1b	coronin, actin binding protein 1B	28.5067	28.0918	28.3032	28.1794	28.2863	28.5954	28.0756	28.1484	28.5396	28.5954
Q8C145	Slc39a6	solute carrier family 39 (metal ion transporter), member 6	24.4791	22.8689	22.9472	20.4312	20.4312	24.6972	21.1471	24.5503	21.9789	23.3908
Q9WVJ2	Psmd13	proteasome (prosome, macropain) 26S subunit, non-ATPase, 13	26.9769	25.8372	25.9482	26.3605	20.475	26.1316	27.2888	26.2184	25.7321	25.5369
P48962	Slc25a4	solute carrier family 25 (mitochondrial carrier, adenine nucleotide translocator), member 4	34.2225	34.0032	34.1429	34.2765	34.2952	33.96	34.2765	34.2765	34.5728	34.3402
D3YWT0	None	None	20.475	22.7355	20.4312	24.3758	21.5199	23.086	23.5534	23.768	20.4312	22.872
Q8C0J2	Atg16l1	autophagy related 16 like 1	23.3448	23.5402	23.3977	24.9291	25.6146	21.4108	24.3198	23.5978	23.798	24.5378
P51660	Hsd17b4	hydroxysteroid (17-beta) dehydrogenase 4	28.7995	28.7873	28.2264	28.6593	28.8899	28.6933	28.0159	28.4128	28.8166	28.6263
Q8BP40	Acp6	acid phosphatase 6, lysophosphatidic	25.7964	25.1352	22.5744	25.3426	25.3021	25.1865	25.6126	25.6813	21.7411	20.6289
Q61749	Eif2b4	eukaryotic translation initiation factor 2B, subunit 4 delta	24.4489	25.4496	25.6813	25.2694	24.5139	24.9447	24.9328	25.9355	25.1983	25.7723
Q4KUS2	Unc13a	unc-13 homolog A	28.247	28.1949	28.1537	27.7279	27.9489	28.2961	27.5145	27.9132	28.1484	27.6343
Q8R5J9	Arl6ip5	ADP-ribosylation factor-like 6 interacting protein 5	26.7129	26.181	26.575	26.3984	26.3254	26.2807	27.2153	26.1372	26.0327	24.8184
Q9WVK8	Cyp46a1	cytochrome P450, family 46, subfamily a, polypeptide 1	27.2214	26.5881	26.4969	27.1356	26.8724	26.9069	26.7762	27.2214	27.0382	27.0764
Q8BGV8	Mief1	mitochondrial elongation factor 1	24.2275	22.9937	24.109	24.4075	20.6289	21.4108	21.1471	20.4312	23.3501	25.1814
F7BCN0	None	None	20.475	22.7602	22.6884	22.5329	22.8897	23.9973	21.1471	22.8585	22.7413	23.46
A0A0M3HEP7	Atp8a1	ATPase phospholipid transporting 8A1	29.6001	29.5562	29.5819	30.048	29.7857	29.6492	29.995	29.9934	29.5601	29.9415
Q8C419	Gpr158	G protein-coupled receptor 158	28.9356	29.3573	29.4048	29.1071	29.3409	28.9018	29.1593	28.9788	29.311	29.2742
Q9WUR9	Ak4	adenylate kinase 4	24.8435	23.536	23.7776	21.3464	24.1703	24.2806	21.1471	23.8048	22.3588	22.5796
P35802	Gpm6a	glycoprotein m6a	32.6689	32.1355	32.0546	31.5919	32.2738	32.2292	31.6547	32.1355	31.6333	32.1355
P49962	Srp9	signal recognition particle 9	22.7838	22.5056	21.7411	22.8936	23.476	23.6678	23.536	23.6147	21.1695	23.922
Q8BGC4	Ptgr3	prostaglandin reductase 3	24.95	26.2414	25.1734	26.1744	25.8521	26.5223	26.0769	26.2588	25.3762	25.6092
Q9ESW4	Agk	acylglycerol kinase	30.073	30.4535	30.3674	30.5559	30.3383	30.1549	30.5235	30.6254	30.8334	30.2796
Q9CQV1	Pam16	presequence translocase-asssociated motor 16	26.8997	26.4433	26.7523	26.4661	25.4975	26.8618	26.4855	26.7444	26.6198	26.453
Q921J2	Rheb	Ras homolog enriched in brain	27.5872	27.3148	27.2589	27.1853	27.6278	27.7909	27.2805	26.6953	26.4688	27.5798
P70349	Hint1	histidine triad nucleotide binding protein 1	26.3897	24.4976	25.0319	25.8618	25.1616	24.5574	25.1401	25.3588	25.4589	24.825
A0A0J9YTY0	None	None	31.0311	31.1607	31.2584	31.2022	31.1122	30.9618	31.2932	30.9726	31.1814	31.0311
P47941	Crkl	v-crk avian sarcoma virus CT10 oncogene homolog-like	23.643	23.3377	21.2441	23.6302	23.8203	24.7963	22.8827	24.7817	23.6487	22.4722
Q99PV0	Prpf8	pre-mRNA processing factor 8	27.0977	27.8293	26.7985	27.1323	27.142	25.5547	26.9708	27.5963	27.6544	26.3753
A0A0R3P9C8	None	None	30.5971	30.8053	30.8863	31.2351	30.6284	30.4753	30.9988	31.1877	31.0415	31.2022
Q6P542	Abcf1	ATP-binding cassette, sub-family F member 1	25.4959	22.0155	24.8881	24.8828	23.9973	23.4872	24.4524	25.1111	28.0185	24.4407
Q62420	Sh3gl2	SH3-domain GRB2-like 2	30.3998	30.3147	30.3147	30.3221	30.0621	30.7603	30.0128	30.5128	30.1569	30.6284
E9PYN1	Cadm1	cell adhesion molecule 1	26.893	26.5791	26.128	26.319	27.4334	27.4432	26.0044	26.0547	26.1117	26.2091
P63115	Slc7a10	solute carrier family 7 (cationic amino acid transporter, y+ system), member 10	26.1326	24.9972	24.1235	25.2753	24.8184	25.7417	24.0249	24.9447	22.9568	25.1588
Q3UTZ3	Trappc14	trafficking protein particle complex 14	23.0251	25.1111	25.4035	25.8847	24.4489	25.1772	25.3324	25.2191	25.2586	25.0235
P62892	Rpl39	ribosomal protein L39	20.475	20.4312	26.0769	26.2817	25.2289	21.4108	25.9056	25.8298	26.5553	25.7863
Q66GT5	Ptpmt1	protein tyrosine phosphatase, mitochondrial 1	24.1721	22.5796	23.5752	22.6501	20.4312	25.9509	23.6248	20.4312	23.2874	24.9665
Q99N94	Mrpl9	mitochondrial ribosomal protein L9	25.261	25.8847	24.534	25.1653	25.8263	21.4108	25.5337	25.6414	24.9945	25.4718
A0A0J9YUD8	None	None	28.2544	28.249	28.2107	28.532	28.3415	28.5237	28.3632	28.0315	28.1761	27.9997
P13595	Ncam1	neural cell adhesion molecule 1	29.7971	29.7946	29.6703	29.7196	30.2405	29.5562	28.674	30.1361	29.6137	30.048
Q8K354	Cbr3	carbonyl reductase 3	25.6735	25.5559	24.6843	25.9867	25.9623	25.7688	24.9665	25.2274	23.7735	26.1221
O89023	Tpp1	tripeptidyl peptidase I	24.6772	25.0235	23.822	24.0992	24.8235	25.0623	21.1471	24.6991	23.5109	24.7837
Q9WV34	Mpp2	membrane protein, palmitoylated 2 (MAGUK p55 subfamily member 2)	29.6429	29.5683	29.7354	29.6532	29.6585	29.7045	29.577	29.4449	29.5014	29.755
Q9CQV8	Ywhab	tyrosine 3-monooxygenase/tryptophan 5-monooxygenase activation protein, beta polypeptide	31.0953	30.6965	30.8334	30.7603	31.086	31.0084	30.6509	30.7567	30.4351	31.0269
Q9EQ06	Hsd17b11	hydroxysteroid (17-beta) dehydrogenase 11	24.852	23.6588	24.3033	25.1111	24.3338	21.4108	24.914	25.1226	21.553	25.3062
Q8K3H0	Appl1	adaptor protein, phosphotyrosine interaction, PH domain and leucine zipper containing 1	28.1327	28.2381	28.0918	27.6852	29.0815	28.3487	27.9253	28.2304	28.0918	27.4511
P53994	Rab2a	RAB2A, member RAS oncogene family	29.6948	29.9894	29.7916	29.8366	29.9415	30.0518	30.0866	30.1257	29.4629	30.112
E9PV26	Prr36	proline rich 36	25.8771	25.9554	26.2227	25.8185	26.1018	25.7508	26.2488	24.5626	26.7511	24.8999
Q62283	Tspan7	tetraspanin 7	27.541	26.6475	27.4441	26.7413	27.7662	27.6254	26.9226	26.5737	26.237	27.3503
Q8BGF8	Slc35d3	solute carrier family 35, member D3	23.299	22.3854	23.3578	22.7559	23.0338	23.995	21.1471	22.614	20.6289	23.5567
A2AHC3	Camsap1	calmodulin regulated spectrin-associated protein 1	26.5152	26.8637	26.2777	26.0392	26.4677	25.9668	26.5881	26.5253	26.6224	25.0999
F6Z9E6	None	None	29.5438	29.3784	29.7196	29.4358	29.162	29.6299	29.633	29.2742	29.8593	29.4195
Q3UNH4	Gprin1	G protein-regulated inducer of neurite outgrowth 1	30.3456	30.8126	30.2981	29.6662	30.6359	30.0969	30.2405	29.8735	30.6719	29.8267
Q9Z2D1	Mtmr2	myotubularin related protein 2	24.2861	24.9979	25.0196	25.3659	23.8137	25.4808	24.34	22.3716	24.1186	24.6991
A0A0A6YX71	None	None	28.3734	28.1389	28.586	28.1867	28.0294	28.0816	28.6045	28.5185	28.3789	28.2961
Q6NV83	U2surp	U2 snRNP-associated SURP domain containing	24.511	21.6817	23.2519	24.2317	24.68	21.4108	24.3551	24.373	23.5545	20.6289
Q8BI84	Mia3	MIA SH3 domain ER export factor 3	23.0722	24.7811	20.916	21.394	24.5772	21.4108	24.4336	20.6289	23.0454	20.6289
Q8CGF6	Wdr47	WD repeat domain 47	28.9825	28.6933	28.6819	28.7634	29.0604	28.6051	28.4403	28.8959	29.0191	28.6752
Q9CZN8	Qrsl1	glutaminyl-tRNA synthase (glutamine-hydrolyzing)-like 1	24.1365	22.727	21.6256	23.8754	23.5507	23.5978	23.822	24.0249	22.4049	24.4831
P61963	Dcaf7	DDB1 and CUL4 associated factor 7	22.7181	23.9898	24.1933	25.1961	24.8638	25.3544	25.571	25.5337	22.5744	24.9199
Q922P9	Glyr1	glyoxylate reductase 1 homolog (Arabidopsis)	25.2475	25.1469	24.2806	25.18	24.2491	23.8642	24.6963	24.3152	25.757	23.6219
O54833	Csnk2a2	casein kinase 2, alpha prime polypeptide	27.3681	27.7875	27.3481	27.6161	27.2214	27.1701	27.8026	27.9489	27.2445	28.0611
Q3KNM2	Marchf5	membrane associated ring-CH-type finger 5	27.6435	26.57	26.0983	27.541	25.6568	27.2162	27.6185	26.9839	26.4709	27.0437
G3UYC3	None	None	22.467	23.1022	20.4312	24.1365	21.3957	21.4108	21.1471	24.5772	24.5772	24.0597
Q64337	Sqstm1	sequestosome 1	24.1301	24.9409	25.4445	25.0764	25.1961	21.4108	25.2374	25.6752	24.3419	24.8122
Q9D2G2	Dlst	dihydrolipoamide S-succinyltransferase	30.2343	30.048	29.8778	30.1722	29.6429	30.4055	29.9318	30.0621	29.9078	30.2761
Q921F4	Hnrnpll	heterogeneous nuclear ribonucleoprotein L-like	25.9694	26.9188	27.1246	27.6343	26.0179	26.6509	26.9209	26.9101	27.5532	27.1289
P61202	Cops2	COP9 signalosome subunit 2	26.2248	26.8959	27.1125	27.1007	26.9728	27.5247	26.5108	27.664	26.4113	27.5392
P03899	ND3	NADH dehydrogenase subunit 3	25.8316	25.4808	25.9247	25.6614	25.5357	21.4108	26.5315	25.586	24.9316	26.1162
Q8BLQ9	Cadm2	cell adhesion molecule 2	29.851	29.492	29.7604	29.5385	29.7999	29.8366	29.3008	29.6948	29.4611	29.6521
P56387	Dynlt3	dynein light chain Tctex-type 3	24.5036	20.4312	24.4307	24.4481	24.2719	24.6559	24.1441	23.574	24.1603	25.0488
A2AS98	Nckap1	NCK-associated protein 1	31.1122	31.345	31.3234	31.4337	31.1607	31.2834	31.3081	31.2506	31.5754	31.3081
Q8K021	Scamp1	secretory carrier membrane protein 1	29.0972	29.4556	29.3617	29.12	29.8735	29.4259	29.1183	29.5438	28.8073	29.2169
P97742	Cpt1a	carnitine palmitoyltransferase 1a, liver	26.0179	25.1976	24.1899	25.7893	25.6614	25.8041	25.7263	25.5369	25.1291	26.1984
O35345	Kpna6	karyopherin subunit alpha 6	24.2317	24.3889	23.9095	24.8962	24.3671	24.075	25.0375	22.5943	24.0612	24.2458
Q7TSQ8	Pdpr	pyruvate dehydrogenase phosphatase regulatory subunit	26.6825	25.571	26.552	26.1316	27.3481	26.8269	26.7114	27.1382	25.8678	27.3752
P47963	Rpl13	ribosomal protein L13	29.0494	28.5067	28.644	28.4261	28.0177	29.226	29.0706	28.4431	28.6392	28.2883
Q99MR6	Srrt	serrate RNA effector molecule homolog (Arabidopsis)	26.1597	24.7683	24.6075	31.3546	23.9731	23.5752	25.2128	25.4842	25.8282	24.9316
Q9D7J4	Cox20	cytochrome c oxidase assembly protein 20	25.0172	23.8986	23.7098	20.4312	24.8209	24.3171	23.6358	20.4312	22.8234	22.2528
Q9D708	S100a16	S100 calcium binding protein A16	24.9291	21.3819	21.368	23.1082	24.397	23.2488	26.6566	23.7367	21.4894	24.7575
Q99J56	Derl1	Der1-like domain family, member 1	22.8202	22.2008	21.5315	22.2514	21.8291	24.026	21.1471	22.1273	21.973	23.8837
O70325	Gpx4	glutathione peroxidase 4	28.5831	28.3142	28.2077	28.4897	28.9242	28.9149	28.5779	27.8598	28.3247	27.8333
Q9JKC8	Ap3m1	adaptor-related protein complex 3, mu 1 subunit	26.1517	25.7589	25.1943	26.2301	25.2128	26.3909	26.2649	25.5137	25.5274	26.0472
Q99020	Hnrnpab	heterogeneous nuclear ribonucleoprotein A/B	27.1278	26.7846	26.377	27.3629	26.4447	26.9461	26.9909	26.9118	27.0691	26.9787
D3YUB9	None	None	24.5433	23.5752	23.2488	25.3704	23.5655	23.0396	25.3386	25.3617	23.895	25.2128
P49615	Cdk5	cyclin dependent kinase 5	27.5963	27.9366	26.9209	27.9287	27.3681	28.0269	28.1867	27.3725	27.2749	27.9925
Q80UE5	None	None	28.4791	29.1417	29.4449	28.6319	29.0917	28.4948	28.9242	28.917	29.0065	28.6045
Q8K009	Aldh1l2	aldehyde dehydrogenase 1 family, member L2	24.8547	25.5095	25.6015	25.2006	25.2191	24.6359	25.1961	25.5485	25.71	23.6726
Q9WTP6	Ak2	adenylate kinase 2	20.475	24.507	20.4312	22.9568	24.506	21.4108	23.5599	24.2601	23.7367	24.2651
Q9CRD0	Ociad1	OCIA domain containing 1	27.2411	27.7261	27.6305	27.1668	27.9884	27.9143	26.6011	27.5131	27.8153	26.5223
Q3TA40	6430548M08Rik	RIKEN cDNA 6430548M08 gene	28.0237	26.9426	27.5817	27.9321	27.6243	27.8333	27.1967	27.5263	26.3152	27.8293
A2ASZ8	Slc25a25	solute carrier family 25 (mitochondrial carrier, phosphate carrier), member 25	27.4441	27.6185	27.6957	28.2426	27.7076	27.0933	27.6468	27.6889	27.6951	27.8221
Q9D906	Atg7	autophagy related 7	23.2921	24.918	24.8413	26.6953	25.6944	24.4418	25.4487	26.5374	25.4445	26.3499
A0A0R4J1X1	None	None	20.475	23.5008	21.8154	22.239	21.5306	21.4108	23.5895	23.3305	24.0102	20.6289
A2AHG0	Lzts3	leucine zipper, putative tumor suppressor family member 3	24.5093	26.5968	26.4845	24.4237	27.2364	24.7662	23.9051	25.4827	27.2621	24.4489
P45952	Acadm	acyl-Coenzyme A dehydrogenase, medium chain	27.9253	27.6382	27.8153	27.9137	28.4352	27.7823	28.0816	27.6748	27.1679	28.1248
P16125	Ldhb	lactate dehydrogenase B	31.762	31.498	31.6091	31.8137	31.8769	31.7756	31.7756	31.6547	31.2834	31.6014
E9Q9C5	None	None	30.0969	30.289	29.3896	30.4753	30.0128	31.0415	30.2938	30.7716	29.8958	29.5964
E9Q2E4	Hectd4	HECT domain E3 ubiquitin protein ligase 4	26.3999	26.6155	26.7476	26.4318	27.4585	25.7429	25.8899	27.0115	27.1209	26.4874
P56480	Atp5f1b	ATP synthase F1 subunit beta	33.6851	33.3841	33.9265	33.8037	33.9265	34.1429	33.7576	34.1429	33.222	34.4008
E9QAH1	Golgb1	golgin B1	20.475	23.791	24.0829	27.159	20.4312	24.9621	25.8678	25.5258	20.4312	25.8695
Q6ZPQ6	Pitpnm2	phosphatidylinositol transfer protein, membrane-associated 2	28.169	28.2216	28.5237	27.8881	28.4948	27.7261	28.4431	28.8149	28.4214	28.8512
Q64519	Sdc3	syndecan 3	25.7217	25.6514	26.356	24.7279	25.4163	26.4471	25.8342	25.84	25.2342	25.8521
Q6NZL0	Mtcl3	MTCL family member 3	28.7505	28.5122	28.4352	28.2264	28.93	28.2107	28.2645	28.8275	28.7276	28.0028
Q6PB93	Galnt2	polypeptide N-acetylgalactosaminyltransferase 2	22.5406	21.5199	22.5579	22.4333	20.475	21.4108	22.4966	20.4312	22.1947	20.6289
Q9WV18	Gabbr1	gamma-aminobutyric acid type B receptor subunit 1	27.9489	27.6209	29.0348	27.6889	27.817	27.7061	27.086	27.5024	29.0937	26.7713
Q9CPR4	Rpl17	ribosomal protein L17	28.5954	28.0237	28.4874	28.4634	28.1406	28.5607	28.5607	28.2508	28.5736	28.3012
Q9JKD3	Scamp5	secretory carrier membrane protein 5	29.04	28.8629	28.5997	28.8779	28.8149	29.1638	27.5427	28.745	28.3938	29.1046
Q9JI90	Rnf14	ring finger protein 14	25.7589	24.0217	23.9067	25.5324	25.0957	24.8682	24.3702	24.3053	24.1985	24.8962
Q5DTT2	Psd	pleckstrin and Sec7 domain containing	25.5137	27.1738	26.9644	25.0506	25.8771	26.3314	25.5509	26.8521	27.2537	26.6433
A2AR02	Ppig	peptidyl-prolyl isomerase G (cyclophilin G)	20.475	24.0597	23.0941	21.5564	22.5851	21.4108	21.1471	20.4312	24.3171	20.6289
Q91WD5	Ndufs2	NADH:ubiquinone oxidoreductase core subunit S2	29.6922	29.1638	29.3441	29.7741	29.7478	29.9365	29.5916	30.0769	28.9672	30.1764
P42208	Septin2	septin 2	28.6819	29.0348	28.6167	29.0694	28.6304	28.8629	28.6752	28.9018	28.9356	29.1909
J3QMN4	None	None	26.6084	27.1043	26.6974	27.0611	27.1278	27.2589	27.2695	27.2789	26.575	26.9389
Q3U5Q7	Cmpk2	cytidine/uridine monophosphate kinase 2	24.6359	25.8086	25.4658	25.3606	25.7367	25.5274	25.1865	25.0235	24.1441	25.7236
A0A0A6YW36	Rgs7	regulator of G protein signaling 7	29.0754	28.383	28.3432	28.8149	28.2961	28.1963	28.621	28.7162	29.7045	28.8629
O70305	Atxn2	ataxin 2	25.0036	25.7872	25.6276	24.5752	25.63	23.7857	26.5282	24.511	25.9641	22.9785
Q04899	Cdk18	cyclin dependent kinase 18	23.054	23.0878	20.4312	23.5599	21.3617	23.352	21.1471	22.4494	20.6289	20.6289
Q6P9K9	Nrxn3	neurexin III	29.4048	29.6521	29.3784	29.3147	29.6369	29.3617	29.6801	29.1784	29.2781	29.4403
O54983	Crym	crystallin, mu	31.0052	30.8544	31.1029	30.8384	31.551	31.1122	31.3709	31.3956	30.7288	31.5243
B1AUQ7	None	None	24.5194	24.4336	23.6673	24.7053	24.3079	25.2643	24.2339	24.1956	23.8754	25.6155
Q8BFT9	Svop	SV2 related protein	23.6475	23.8403	24.8624	23.0893	25.1588	24.8474	21.1471	23.7535	23.1729	24.5752
Q8R435	Kcnj4	potassium inwardly-rectifying channel, subfamily J, member 4	20.475	22.2514	23.9683	20.4312	23.7841	21.4108	24.9548	22.3608	22.8489	23.2475
B9EJ80	Pdzd8	PDZ domain containing 8	23.395	24.4524	24.284	21.9578	24.534	24.0631	21.1471	22.9023	23.4247	24.1235
Q9JJV2	Pfn2	profilin 2	29.9501	29.8778	29.7857	29.8593	29.8593	30.2343	29.9285	30.1233	29.5061	30.0621
Q91VT4	Cbr4	carbonyl reductase 4	26.483	26.7502	27.0611	26.4874	26.6414	26.5933	26.9875	26.5198	27.1194	26.8342
E9QN14	Srgap3	SLIT-ROBO Rho GTPase activating protein 3	27.8735	28.2719	28.0714	28.544	27.9124	27.9121	28.2197	28.3465	28.5696	28.2843
A0A2I3BRL8	None	None	30.4332	30.4332	30.3221	29.595	30.3631	30.112	30.1484	29.9078	30.4726	29.6635
O88520	Shoc2	Shoc2, leucine rich repeat scaffold protein	24.2952	24.1163	23.6208	24.6112	23.2763	24.5909	23.9644	24.6101	23.5261	24.524
Q9QZE7	Tsnax	translin-associated factor X	25.9221	25.1772	24.2514	24.8073	24.0173	26.2032	26.2624	24.044	24.2651	25.7705
P63163	Snrpn	small nuclear ribonucleoprotein N	26.244	25.581	25.0764	24.9447	24.8275	25.4676	21.1471	25.5525	26.024	24.7709
A2A8E2	None	None	23.9229	24.0967	22.7696	25.4842	22.6797	23.9644	21.1471	25.1852	23.9177	20.6289
P62821	Rab1a	RAB1A, member RAS oncogene family	31.2932	31.1398	31.2263	30.6575	31.4513	31.4065	30.8384	31.1317	30.7785	30.902
Q9DBC7	Prkar1a	protein kinase, cAMP dependent regulatory, type I, alpha	28.1105	28.4413	27.9106	28.5346	27.8153	28.2696	28.0336	27.7274	28.1594	27.9402
A0A0J9YTU3	Specc1	sperm antigen with calponin homology and coiled-coil domains 1	23.5655	25.4183	26.5392	24.6575	26.4874	21.4108	25.7561	24.9548	26.5763	23.702
Q8BJ42	Dlgap2	DLG associated protein 2	26.5336	27.1555	27.142	26.3969	26.7985	25.4959	26.3295	26.836	27.8378	25.7444
Q9ERU9	Ranbp2	RAN binding protein 2	21.8052	24.315	24.3316	23.4567	25.3182	21.4108	24.5867	20.6289	26.6074	20.6289
A0A6Q6Q7B9	Clcn3	chloride channel, voltage-sensitive 3	24.6426	23.1757	24.701	21.8052	24.1798	21.4108	24.6456	23.9459	23.0722	22.2514
P47708	Rph3a	rabphilin 3A	30.6359	30.3674	30.6719	30.1314	30.3977	30.3741	30.045	30.289	30.7146	30.1834
D3Z6H3	Dctn6	dynactin 6	25.3511	24.7934	24.8073	25.137	25.6119	25.2393	24.5965	25.3551	22.9607	25.5559
Q8BGT8	Phyhipl	phytanoyl-CoA hydroxylase interacting protein-like	30.4818	30.26	30.0217	30.2511	30.1314	30.0834	30.2548	30.0128	30.2796	30.1484
Q9D8B6	Fam210b	family with sequence similarity 210, member B	25.4975	24.8449	25.7688	22.6066	25.2586	25.5137	24.1105	23.1044	24.8467	23.5455
Q9QUR8	Sema7a	sema domain, immunoglobulin domain (Ig), and GPI membrane anchor, (semaphorin) 7A	25.2825	22.8439	23.2199	24.095	20.4312	24.7677	23.5507	24.2098	24.0351	22.7838
O54916	Reps1	RalBP1 associated Eps domain containing protein	23.4092	24.581	23.8203	22.388	25.0005	24.1235	24.2325	24.507	23.4164	25.0214
Z4YKB8	None	None	29.1465	29.5266	29.492	29.3856	29.387	28.9074	30.0505	29.2332	29.2235	28.4448
Q3U7U3	Fbxo7	F-box protein 7	24.026	25.2453	21.7683	23.5008	23.3328	24.1163	24.1405	24.2131	24.8424	23.071
P58871	Tnks1bp1	tankyrase 1 binding protein 1	20.475	24.2601	23.46	21.7969	20.4312	21.4108	22.614	23.9032	22.5643	23.4468
Q8CAK1	Iba57	IBA57 homolog, iron-sulfur cluster assembly	24.701	24.8164	25.2289	26.1744	24.914	24.7829	26.5952	26.065	24.3053	26.1148
Q9ERB0	Snap29	synaptosomal-associated protein 29	20.475	20.6289	23.9494	20.952	23.9683	23.5109	23.8684	23.6773	20.6289	22.2868
Q640M6	Gdpd5	glycerophosphodiester phosphodiesterase domain containing 5	20.475	23.6302	22.9584	22.792	21.5536	21.4108	24.6289	20.4312	20.4312	20.6289
P60824	Cirbp	cold inducible RNA binding protein	25.8196	26.4471	26.158	26.2612	26.453	27.1289	27.1991	25.9611	26.6974	25.531
Q3TQZ7	Mapk10	mitogen-activated protein kinase 10	26.356	26.1144	23.185	24.4818	24.1321	26.9632	24.4976	25.848	26.0019	24.1163
E9Q912	Rap1gds1	RAP1, GTP-GDP dissociation stimulator 1	28.7127	28.1857	26.8572	27.2743	26.8637	27.9997	25.9931	27.5392	26.8618	27.4855
A0A0R4J079	Acbd3	acyl-Coenzyme A binding domain containing 3	22.1598	22.164	23.6147	24.4766	24.2531	24.0538	21.1471	24.1148	20.4312	23.3064
A0A1L1SQA8	None	None	27.357	30.6093	30.3872	27.8496	26.9001	27.2537	28.4276	30.4628	30.6254	30.4314
D3Z2B4	None	None	24.2918	21.5643	23.364	20.4312	23.6462	21.4108	21.1471	23.8926	22.5606	20.6289
Q8K3G9	Appl2	adaptor protein, phosphotyrosine interaction, PH domain and leucine zipper containing 2	24.936	25.3231	24.8449	25.7531	24.9015	25.5816	25.0826	25.4445	24.9972	25.4734
Q9ESN4	C1ql3	C1q-like 3	22.0035	24.0733	23.4247	24.1775	24.1197	23.7727	23.5065	23.9286	23.5188	25.0506
Q9CQE1	Nipsnap3b	nipsnap homolog 3B	28.5941	28.2346	28.4261	28.2086	28.4327	28.5396	28.4819	28.2197	28.2107	27.9287
Q60634	Flot2	flotillin 2	27.8631	27.6142	28.2615	27.8961	28.9553	28.6229	28.6579	28.5628	27.7499	28.1484
Q80Y86	Mapk15	mitogen-activated protein kinase 15	27.0415	26.2861	26.6291	26.6974	26.7114	27.2621	21.1471	26.9959	26.3314	27.0235
Q3UPL0	Sec31a	SEC31 homolog A, COPII coat complex component	28.4375	28.3247	28.5921	28.2508	27.8631	28.5479	27.986	27.4808	28.2696	28.3164
A0A1B0GRU8	None	None	24.4109	23.8724	24.2622	22.6527	21.965	21.4108	23.0722	23.3993	25.0525	20.6289
Q60865	Caprin1	cell cycle associated protein 1	27.2724	27.3071	27.0786	25.9162	26.4855	26.6643	27.2364	27.4691	27.5308	26.5013
Q5HZI2	C2cd4c	C2 calcium-dependent domain containing 4C	27.6278	27.9439	26.2355	23.6091	26.9812	25.1145	25.3317	25.9518	26.7701	25.9736
P10630	Eif4a2	eukaryotic translation initiation factor 4A2	28.621	27.986	28.039	28.7117	27.8255	28.6319	28.5113	28.6051	27.6816	28.798
Q9CQZ6	Ndufb3	NADH:ubiquinone oxidoreductase subunit B3	26.4788	27.7588	28.3734	28.0987	28.3975	27.8547	28.1199	28.546	27.6343	28.5122
Q99K85	Psat1	phosphoserine aminotransferase 1	28.7711	28.4913	28.2994	29.1268	28.5941	28.847	29.0065	28.9584	28.2077	29.0937
P14869	Rplp0	ribosomal protein lateral stalk subunit P0	29.7411	28.9788	29.17	29.5293	29.0226	29.6137	29.3617	29.1828	29.6492	29.3147
Q6TEK5	Vkorc1l1	vitamin K epoxide reductase complex, subunit 1-like 1	23.6653	21.1851	23.3888	20.4312	23.6716	21.4108	23.1327	24.0217	22.7696	24.397
A0A2I3BRT5	Tsc2	TSC complex subunit 2	25.5258	26.893	26.6718	25.3978	27.0447	25.223	26.3897	25.9908	26.9008	25.1176
A0A1D5RLN6	2900026A02Rik	RIKEN cDNA 2900026A02 gene	29.64	29.6075	29.577	29.9758	29.7764	28.9957	29.9313	29.3008	29.6211	29.9515
Q64689	St8sia3	ST8 alpha-N-acetyl-neuraminide alpha-2,8-sialyltransferase 3	23.8048	23.2356	24.3551	20.4312	24.0351	23.781	23.5317	24.1186	24.756	22.7369
Q9JJ59	Abcb9	ATP-binding cassette, sub-family B member 9	23.498	22.1083	20.4312	23.2905	21.9228	22.9546	24.8828	22.8325	20.4312	23.7282
A0A0N4SVT3	None	None	28.857	28.8512	28.4214	28.5581	29.0434	28.759	28.5758	28.3373	28.9864	28.4431
P62717	Rpl18a	ribosomal protein L18A	28.7926	27.5762	27.6142	28.0573	27.3359	28.2843	28.2615	28.049	27.7588	28.0918
B2RY56	Rbm25	RNA binding motif protein 25	24.5694	22.4899	22.3943	23.826	23.9067	21.4108	24.8474	22.1693	23.4792	22.4209
A2AF47	Dock11	dedicator of cytokinesis 11	24.743	24.9574	24.373	21.2123	24.3928	21.4108	22.7413	23.1996	23.498	25.2253
Q9EPK2	Rp2	retinitis pigmentosa 2 homolog	22.3191	24.0134	23.407	24.2325	24.9771	24.534	24.284	23.5261	23.086	26.2595
Q8BJU2	Tspan9	tetraspanin 9	23.2245	23.6462	22.8737	24.339	23.6487	25.1844	23.798	24.2508	22.2528	24.3551
Q9WV69	Dmtn	dematin actin binding protein	28.7777	28.759	29.0754	28.3269	29.0552	28.4197	28.9788	28.383	29.0434	28.3789
A0A1W2P872	Nova2	NOVA alternative splicing regulator 2	25.5509	25.2242	25.6392	25.6426	25.4913	25.8282	25.8537	25.7321	26.128	24.8804
Q9Z2L6	Minpp1	multiple inositol polyphosphate histidine phosphatase 1	20.475	20.6289	21.2064	22.5923	21.2896	21.4108	22.6501	24.1015	20.4312	20.6289
Q61937	Npm1	nucleophosmin 1	28.4413	25.7531	27.198	27.6931	26.3873	28.4261	27.2647	27.4313	26.5374	28.0427
Q6DFW4	Nop58	NOP58 ribonucleoprotein	25.7872	26.4981	24.8082	26.4471	25.7872	21.4108	27.2986	26.4028	25.7906	24.2531
P62137	Ppp1ca	protein phosphatase 1 catalytic subunit alpha	30.6398	30.4106	30.2142	30.9988	30.2501	30.8053	30.6093	30.5692	30.2841	30.9618
P56212	Arpp19	cAMP-regulated phosphoprotein 19	27.9099	27.9037	28.1559	27.6793	27.4441	28.4913	27.6598	27.663	28.0648	27.9688
Q8C754	Vps52	VPS52 GARP complex subunit	25.674	25.0742	25.7818	26.552	25.893	25.678	25.5559	25.3742	25.4695	25.9144
Q9D3P8	Plgrkt	plasminogen receptor, C-terminal lysine transmembrane protein	25.3687	25.5033	25.2961	24.7536	25.2006	25.1986	24.2098	25.4975	25.5324	24.5485
O35874	Slc1a4	solute carrier family 1 (glutamate/neutral amino acid transporter), member 4	27.3243	25.8263	26.985	27.1396	27.9106	27.7974	27.5762	27.2621	26.6612	27.4009
Q9D892	Itpa	inosine triphosphatase (nucleoside triphosphate pyrophosphatase)	23.4894	21.7411	22.2069	22.5492	23.2921	24.8606	23.6945	23.9578	20.4312	23.5031
E9PUL5	Prrt2	proline-rich transmembrane protein 2	28.0427	27.4009	27.7222	26.6541	28.3993	28.1761	27.6816	26.4941	27.3258	26.9341
Q8VIJ6	Sfpq	splicing factor proline/glutamine rich (polypyrimidine tract binding protein associated)	29.7626	29.4896	29.3823	29.5537	29.4403	29.4421	29.468	29.0507	29.7593	29.4048
P23116	Eif3a	eukaryotic translation initiation factor 3, subunit A	28.2565	27.7338	28.3069	28.5628	27.5145	27.9884	28.2216	28.1105	28.4849	28.3956
Q9Z2C4	Mtmr1	myotubularin related protein 1	25.2902	25.076	26.2248	25.8966	25.3789	25.137	25.3762	25.606	24.8122	25.8618
Q8CI71	Vps50	VPS50 EARP/GARPII complex subunit	27.8598	27.5319	27.3398	27.3856	26.7511	27.7237	27.6682	27.2949	27.3681	27.5775
Q920N7	Syt12	synaptotagmin XII	26.6074	26.564	25.7681	27.3233	26.319	27.1501	26.9082	27.1067	25.6276	27.3071
Q9Z140	Cpne6	copine VI	29.4611	29.2667	29.162	29.7354	29.7045	29.3573	29.4518	29.372	29.1247	29.5161
Q3THW5	H2az2	H2A.Z histone variant 2	32.1934	32.3551	32.0355	32.1105	31.7104	32.1295	31.9854	31.8921	32.2035	31.6333
Q80WG5	Lrrc8a	leucine rich repeat containing 8A VRAC subunit A	26.7499	27.0723	24.0631	25.8627	24.7536	26.4742	26.3233	26.2072	25.8418	25.9056
E9QAT0	Fmr1	fragile X messenger ribonucleoprotein 1	25.1274	20.6289	24.852	24.6485	24.2651	25.2221	24.2123	24.6044	24.534	24.2131
O55091	Impact	impact, RWD domain protein	27.935	28.3734	27.6731	27.5587	27.7367	27.491	28.1794	27.5872	28.0427	27.0015
P62754	Rps6	ribosomal protein S6	27.3856	27.346	27.7727	27.9997	27.2398	27.5117	26.9769	28.1949	27.9877	28.1051
Q3TLZ6	None	None	24.7709	24.6302	24.3298	23.9459	25.2172	21.4108	25.6076	24.2123	24.7033	24.1496
A0A0R4J0W7	Lmtk3	lemur tyrosine kinase 3	24.4161	23.5599	24.9245	23.8614	24.993	23.6302	24.2155	24.095	23.9203	24.6342
A2AT37	Upf2	UPF2 regulator of nonsense transcripts homolog (yeast)	23.1148	22.2306	22.861	23.6147	23.3888	22.8551	23.2099	23.3621	23.2356	23.5655
Q8R050	Gspt1	G1 to S phase transition 1	28.2739	28.2304	28.0539	27.5711	27.8014	28.3172	27.8486	27.9877	28.0294	28.3906
Q91XD7	Creld1	cysteine-rich with EGF-like domains 1	25.2263	22.3191	20.4312	24.7873	24.9733	21.4108	21.1471	23.6839	24.0134	23.2417
Q91ZA3	Pcca	propionyl-Coenzyme A carboxylase, alpha polypeptide	28.8233	28.4849	28.745	29.0706	28.7634	28.8512	28.3611	28.7602	28.5507	28.8528
F6W8Z8	None	None	24.0301	20.4312	23.5109	20.4312	24.2589	24.5139	24.952	22.8551	20.4312	24.5036
P63141	Kcna2	potassium voltage-gated channel, shaker-related subfamily, member 2	22.6921	21.9611	23.4894	23.4372	21.973	21.4108	23.2199	24.5139	23.593	23.123
A0A0U1RP47	None	None	25.0379	23.0025	24.6223	21.9611	23.7949	24.8344	22.861	22.9568	23.7588	20.6289
Q8VHJ5	Mark1	MAP/microtubule affinity regulating kinase 1	28.0451	28.7614	28.7373	27.6703	28.9455	27.9069	28.049	28.0472	28.9156	28.0816
A0A1W2P7R5	Tmem19	transmembrane protein 19	23.4468	22.3912	22.6066	22.9785	23.5978	23.5534	23.4872	22.666	22.4868	20.6289
Q9QXW9	Slc7a8	solute carrier family 7 (cationic amino acid transporter, y+ system), member 8	26.1688	23.3723	24.9915	23.791	25.1865	26.158	23.0789	23.8137	24.2491	23.3971
Q921M3	Sf3b3	splicing factor 3b, subunit 3	26.3032	25.8546	25.848	26.7933	26.3909	26.8342	25.4525	27.114	26.1547	27.0048
Q9CQ85	Timm22	translocase of inner mitochondrial membrane 22	26.1508	25.5525	25.1531	25.7872	25.406	26.7701	26.3646	24.905	25.0623	26.5832
P62267	Rps23	ribosomal protein S23	28.2521	27.7727	27.9378	27.8176	28.4007	29.1135	28.9989	27.4999	27.9786	27.8961
G5E8E0	Rgs17	regulator of G-protein signaling 17	25.1772	22.8936	22.8282	25.5547	22.9214	24.1186	25.5889	25.261	22.9406	24.3873
P35235	Ptpn11	protein tyrosine phosphatase, non-receptor type 11	28.3164	28.3789	28.1455	28.3806	28.2018	28.3111	27.785	27.8765	28.6566	28.1722
Q8CIB5	Fermt2	fermitin family member 2	27.6264	27.9069	27.8835	28.2381	27.8462	27.8221	27.9424	28.0028	28.039	28.109
[truncated: 1,727 more rows]
